# Supplementary material for: Synthesis of novel unnatural α-amino acids (UAAs) containing 7-hydroxy-2,2-dimethyl-chroman using isoxazole as a linker
Source: Royal Society of Chemistry journal article supplement (doi:10.1039/d1nj01985f), 2021-01-01

## Supporting Information

---

### Synthesis of Novel Unnatural $\alpha$ -Amino Acid (UAAs) Containing 7-Hydroxy-2, 2-Dimethyl-Chroman using Isoxazole as Linker

K. Raghavulu<sup>a, b</sup>, Ramakrishna Gudipati<sup>a, b</sup>, K. Basavaiah<sup>b</sup>, Chidananda Swamy Rumalla<sup>a</sup> Satyanarayana Yennam<sup>a</sup>  
& Manoranjan Behera<sup>\*a</sup>

<sup>a</sup>Chemistry Services, Aragen Life Sciences (Formerly known as GVK Biosciences), Survey No's: 125 (part) & 126, IDA Mallapur, Hyderabad-500076, Telangana State, India

<sup>b</sup>Department of Inorganic & Analytical Chemistry, Andhra University, Waltair Junction, Visakhapatnam, Andhra Pradesh, 530003, India

*E-mail:* [Manoranjan.behera@gvkbio.com](mailto:Manoranjan.behera@gvkbio.com); *Tel:* +040 67483507

---

## Contents

|                                                                     |       |
|---------------------------------------------------------------------|-------|
| 1. General information                                              | 2     |
| 2. General Experimental procedure and Analytical Data for compounds | 3-10  |
| 3. Spectral data                                                    | 11-79 |

**General Information:**

All the chemicals were commercially available and procured from companies like Aldrich, Spectrochem (India), S. D. Fine (India), combi-block, fluorochem, matrix and Avra (India) and have been carried forward without further purification. Solvents used in the present study are dried before prior use whenever required. Precoated TLC silica gel plates (Kieselgel 60 F254, Merck) were used for monitoring reactions. Purification was performed by column chromatography using silica gel (Particle size 60-120 mesh, Merck). Melting points were determined in open capillary tubes on cintex melting point apparatus and are uncorrected. IR (KBr) spectra were recorded on Perkin-Elmer FT/IR-4000 using ATR ( $\nu_{max}$  in  $\text{cm}^{-1}$ ) in the frequency range of 600-4000  $\text{cm}^{-1}$ .  $^1\text{H}$  NMR and  $^{13}\text{C}$  NMR spectra were recorded in  $\text{CDCl}_3/\text{DMSO}-d_6$  on a Bruker DRX-400 (400 MHz FT NMR). Chemical shifts are presented in  $\delta$  ppm employing TMS as internal reference. Splitting patterns were reported as s, singlet; d, doublet; t, triplet; q, quartet; m, multiplet; br, broad.

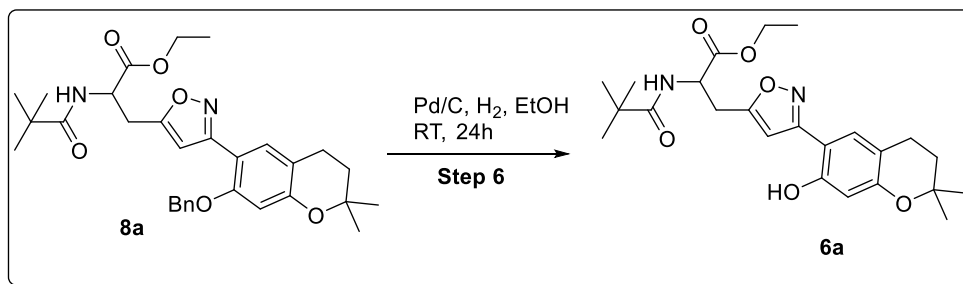

**Experimental procedure for the preparation of ethyl 3-(3-(7-hydroxy-2,2-dimethylchroman-6-yl)isoxazol-5-yl)-2-pivalamidopropanoate (6a):** To a stirred solution of compound **8a** (70 mg, 0.131mmol) in ethanol (10 ml), 10% Pd/C (30 mg) was added and stirred at room temperature for 24 h under hydrogen atmosphere (30 psi). The progress of the reaction was monitored by TLC analysis (20% ethyl acetate/pet ether). After completion of the reaction, the reaction mixture was filtered through celite bed and washed the celite bed with ethanol twice (2x10 ml). Combined organic layers were concentrated under reduced pressure to give the crude compound which was purified by Prep TLC to give compound **11** (50 mg, 86%); MR: 155-158<sup>0</sup>C; IR (KBr, cm<sup>-1</sup>): 3380, 2973.4, 2932, 2867.3, 1743, 1644, 1520, 1450, 1376, 1288,1205, 1152, 1118, 1022, 955, 879, 867, 772, 621. <sup>1</sup>H NMR (500 MHz, CDCl<sub>3</sub>): δ = 9.22 (s, 1H, -OH), 7.09 (s, 1H, Ar-H), 6.46 (s, 1H, Ar-H), 6.39-6.37 (d, *J* = 7 Hz, 1H, -NH), 6.34 (s, 1H, isoxazole-H), 4.89-4.86 (q, 1H, chiral-H), 4.30-4.22 (q, 2H, -OCH<sub>2</sub>), 3.50-3.33 (m, 2H, -CH<sub>2</sub>), 2.75-2.72 (t, *J* = 13.5 Hz, 2H, -CH<sub>2</sub>), 1.82-1.79 (t, *J* = 13.5 Hz, 2H, Ar-CH<sub>2</sub>), 1.34 (s, 6H, -(CH<sub>3</sub>)<sub>2</sub>), 1.32-1.30 (t, *J* = 13 Hz, 3H, -CH<sub>3</sub>), 1.20 (s, 9H, -(CH<sub>3</sub>)<sub>3</sub>); <sup>13</sup>C NMR (500 MHz, CDCl<sub>3</sub>) = 178.50, 170.75, 167.53, 162.54, 157.18, 156.37, 128.67, 113.18, 106.14, 105.11, 100.48, 75.08, 62.38, 50.89, 38.90, 32.96, 29.100, 27.51, 27.00, 21.86, 14.24. MS (EI): *m/z* 445 (M+1, 100); HRMS: calcd for: C<sub>24</sub>H<sub>33</sub>N<sub>2</sub>O<sub>6</sub> [M+H]: 445.2339; Found: 445.2340.

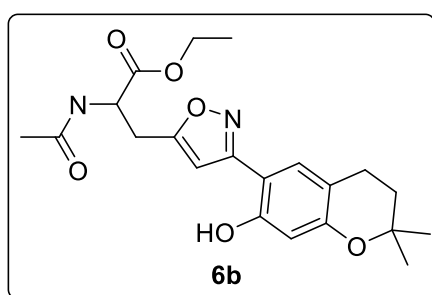

**Ethyl 2-acetamido-3-(3-(7-hydroxy-2,2-dimethylchroman-6-yl)isoxazol-5-yl)propanoate (6b):** MR: 76-79<sup>0</sup>C; IR (KBr, cm<sup>-1</sup>): 3274.3, 3065, 2980.1, 2930, 2854.7, 1741.8, 1669.4, 1635.7, 1582.6, 1518, 1448.6, 1375.3, 1287.5, 1211.3, 1154.4, 1116.8, 1027.1, 961.5, 879.5, 755.1, 599.8; <sup>1</sup>H NMR (400 MHz, CDCl<sub>3</sub>): δ = 9.20 (s, 1H, -OH), 7.12 (s, 1H, Ar-H), 6.46 (s, 1H, Ar-H), 6.37 (s, 1H, isoxazole-H), 6.26-6.25 (d, *J* = 7.2 Hz, 1H, -NH), 4.95-4.90 (q, 1H, chiral-H), 4.30-4.22 (q, 2H, -OCH<sub>2</sub>), 3.48-3.33 (m, 2H, -CH<sub>2</sub>), 2.76-2.72 (t, *J* = 13.6 Hz, 2H, -CH<sub>2</sub>), 2.04 (s, 3H, -COCH<sub>3</sub>), 1.82-1.79 (t, *J* =

13.6Hz, 2H, Ar-CH<sub>2</sub>), 1.34 (s, 6H, -(CH<sub>3</sub>)<sub>2</sub>), 1.31-1.27 (t, *J* = 14 Hz, 3H, -CH<sub>3</sub>); <sup>13</sup>C NMR (100 MHz, CDCl<sub>3</sub>) = 170.39, 169.94, 167.20, 162.43, 157.05, 156.20, 128.58, 113.03, 105.93, 104.95, 100.42, 74.93, 62.30, 50.80, 32.80, 29.67, 29.15, 26.83, 23.14, 21.68, 14.08; MS (ESI): *m/z* 403 (M+1, 100).

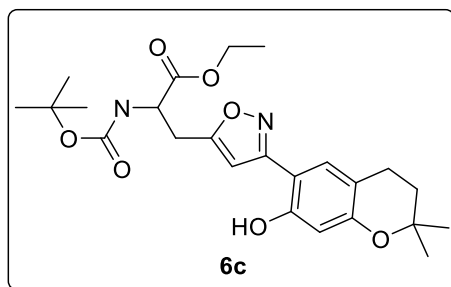

**Ethyl 2-((tert-butoxycarbonyl)amino)-3-(3-(7-hydroxy-2,2-dimethylchroman-6-yl)isoxazol-5-yl)propanoate (6c):** MR: 103-106<sup>0</sup>C; IR (KBr, cm<sup>-1</sup>): 3356.2, 3247.3, 3148.9, 2977.2, 2931.9, 2852.8, 1737.9, 1709.9, 1638.6, 1585.5, 1514.1, 1450.5, 1369.5, 1289.4, 1222.9, 1187.2, 1160.2, 1017.4, 962.5, 878.6, 846.7, 792.7, 615.3; <sup>1</sup>H NMR (500 MHz, CDCl<sub>3</sub>): δ= 9.23 (s, 1H, -OH), 7.12 (s, 1H, Ar-H), 6.46 (s, 1H, Ar-H), 6.39 (s, 1H, isoxazole-H), 5.25-5.24 (d, *J* = 7.5 Hz, 1H, -NH), 4.68-4.66 (m, 1H, chiral-H), 4.27-4.21 (q, 2H, -OCH<sub>2</sub>), 3.41-3.32 (m, 2H, -CH<sub>2</sub>), 2.75-2.73 (t, *J* = 13Hz, 2H, -CH<sub>2</sub>), 1.82-1.80 (t, *J* = 13.5Hz, 2H, Ar-CH<sub>2</sub>), 1.44 (s, 9H, -(CH<sub>3</sub>)<sub>3</sub>), 1.34 (s, 6H, -(CH<sub>3</sub>)<sub>2</sub>), 1.29-1.26 (t, *J* = 14.5 Hz, 3H, -CH<sub>3</sub>); <sup>13</sup>C NMR (150 MHz, CDCl<sub>3</sub>) = 170.58, 167.38, 162.42, 156.98, 156.22, 155.07, 128.57, 112.97, 106.03, 104.93, 100.22, 80.41, 74.90, 62.09, 51.97, 32.81, 29.71, 28.24, 26.85, 21.69, 14.09; MS (ESI): *m/z* 461 (M+1, 100).

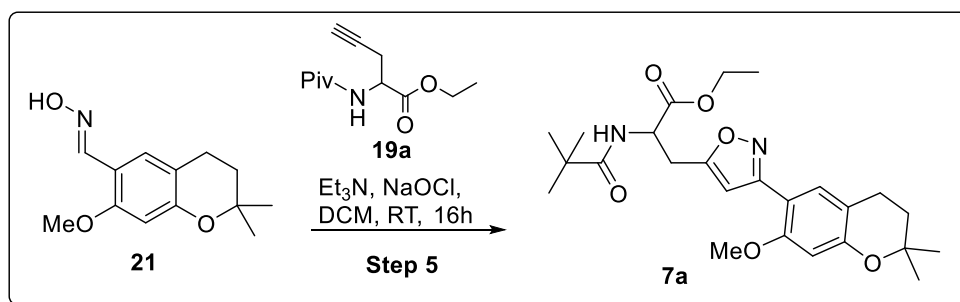

**Experimental procedure for the preparation of ethyl 3-(3-(7-methoxy-2,2-dimethylchroman-6-yl)isoxazol-5-yl)-2-pivalamidopropanoate (7a):** To a stirred solution of compound **21** (1 g, 4.255 mmol) and compound **19a** (1.148 g, 5.106 mmol) in dichloromethane (15 ml), was added triethylamine (0.888 ml, 6.382 mmol) at 0°C and stirred for 10 min then added 10% aqueous NaOCl solution (15 ml) and the reaction mixture was stirred at room temperature for 16 h. The progress of the reaction was monitored by TLC analysis (30% ethyl acetate/pet ether). After completion of the reaction, the reaction mixture was diluted with dichloromethane (250 ml) and washed with water and brine solution.

Organic layer was dried over anhydrous Na<sub>2</sub>SO<sub>4</sub> and concentrated under reduced pressure to give the crude residue which was charged on silica gel column. The column was eluted with 40% ethyl acetate/pet ether to give the compound **7a** (1.5g, 77% yield) as off white solid.

MR: 121-124<sup>0</sup>C; IR (KBr, cm<sup>-1</sup>): 3433, 3408, 2976, 2931, 1814, 1741, 1659, 1623, 1601, 1469, 1439, 1363, 1274, 1262, 1199, 1158, 1119, 1065, 1025, 752; <sup>1</sup>H NMR (400 MHz, CDCl<sub>3</sub>): δ = 7.60 (s, 1H, Ar-H), 6.51 (s, 1H, Ar-H), 6.41 (s, 1H, isoxazole-H), 6.38 (bs, 1H, -NH), 4.86-4.84 (q, 1H, chiral-CH), 4.30-4.19 (q, 2H, -OCH<sub>2</sub>), 3.79 (s, 3H, -OCH<sub>3</sub>), 3.46-3.32 (m, 2H, -CH<sub>2</sub>), 2.75-2.72 (t, *J* = 13.2 Hz, 2H, -CH<sub>2</sub>), 1.82-1.79 (t, *J* = 13.6 Hz, 2H, Ar-CH<sub>2</sub>), 1.35 (s, 6H, -(CH<sub>3</sub>)<sub>2</sub>), 1.32-1.28 (t, *J* = 14.4 Hz, 3H, -CH<sub>3</sub>), 1.21 (s, 9H, -(CH<sub>3</sub>)<sub>3</sub>); <sup>13</sup>C NMR (400 MHz, CDCl<sub>3</sub>) = 178.19, 170.71, 166.95, 129.88, 113.39, 104.50, 100.36, 75.06, 62.01, 55.44, 50.92, 38.72, 32.82, 29.00, 27.36, 26.83, 21.48, 14.10; MS (ESI): *m/z* 459 (M+1, 100).

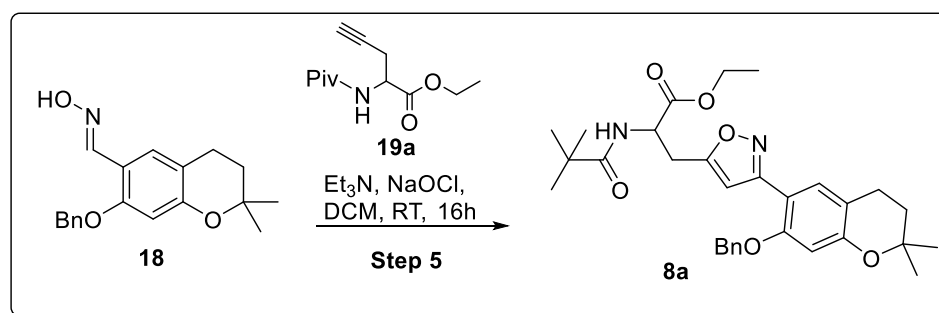

**Experimental procedure for the preparation of ethyl 3-(3-(7-(benzyloxy)-2,2-dimethylchroman-6-yl)isoxazol-5-yl)-2-pivalamidopropanoate (8a):** To a stirred solution of compound **18** (150 mg, 0.482mmol) and compound **19a** (130.2 mg, 0.578mmol) in dichloromethane (10 ml), was added triethylamine (0.1 ml, 0.723 mmol) at 0<sup>o</sup>C and stirred for 10 min then added 10% aqueous NaOCl solution (2 ml) and the reaction mixture was stirred at room temperature for 16 h. The progress of the reaction was monitored by TLC analysis (30% ethyl acetate/pet ether). After completion of the reaction, the reaction mixture was diluted with dichloromethane (25 ml) and washed with water and brine solution. Organic layer was dried over anhydrous Na<sub>2</sub>SO<sub>4</sub> and concentrated under reduced pressure to give the crude residue which was charged on silica gel column. The column was eluted with 16% ethyl acetate/pet ether to give the compound **8a** (160mg, 62% yield) as off white solid.

MR: 129-132<sup>0</sup>C; IR (KBr, cm<sup>-1</sup>): 3364, 3176, 2968, 2925, 2864, 1748, 1666, 1606, 1515, 1463, 1383, 1291, 1191, 1120, 1018, 917, 732, 695, 604; <sup>1</sup>H NMR (400 MHz, CDCl<sub>3</sub>): δ = 7.65 (s, 1H, Ar-H), 7.41-7.30 (m, 5H, Ar-H), 6.49 (s, 1H, Ar-H), 6.47 (s, 1H, isoxazole-H), 6.35 (d, *J* = 7.2 Hz, 1H, -NH), 5.06 (s, 2H, Bn-CH<sub>2</sub>), 4.84-4.80 (q, 1H, chiral-H), 4.16-4.10 (q, 2H, -OCH<sub>2</sub>), 3.38-3.27 (m, 2H, -CH<sub>2</sub>), 2.76-2.73 (t, *J* = 13.2 Hz, 2H, -CH<sub>2</sub>), 1.81-1.78 (t, *J* = 13.2Hz, 2H, Ar-CH<sub>2</sub>), 1.34 (s, 6H, -(CH<sub>3</sub>)<sub>2</sub>), 1.25-1.21 (t, *J* = 15.2 Hz, 3H, -CH<sub>3</sub>), 1.15 (s, 9H, -(CH<sub>3</sub>)<sub>3</sub>); <sup>13</sup>C NMR (400 MHz, CDCl<sub>3</sub>) = 178.14,

170.59, 167.0, 159.94, 156.47, 155.94, 136.55, 129.96, 128.64, 128.03, 127.31, 113.78, 109.86, 104.42, 101.53, 75.07, 70.44, 61.88, 50.83, 38.63, 32.76, 29.03, 27.30, 26.80, 21.50, 14.04. MS (ESI):  $m/z$  535 ( $M+1$ , 100); HRMS: Calcd for:  $C_{31}H_{39}N_2O_6$  [ $M+H$ ]: 535.2808; Found: 535.2820.

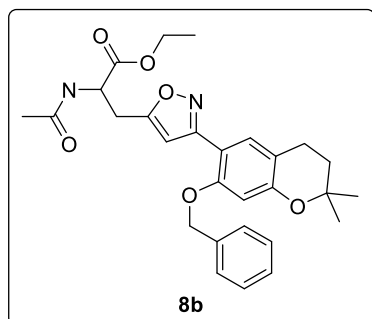

***Ethyl 2-acetamido-3-(3-(7-(benzyloxy)-2,2-dimethylchroman-6-yl)isoxazol-5-yl)propanoate (8b):***

MR: 111-114<sup>0</sup>C; IR (KBr,  $cm^{-1}$ ): 3292.6, 3065, 2978.2, 2931.9, 1741.8, 1665.6, 1516.1, 1457.2, 1383.9, 1274, 1119.7, 753.2, 698.2; <sup>1</sup>H NMR (400 MHz,  $CDCl_3$ ):  $\delta$  = 7.64 (s, 1H, Ar-H), 7.41-7.34 (m, 5H, Ar-H), 6.49 (s, 1H, Ar-H), 6.48 (s, 1H, isoxazole-H), 6.15-6.13 (d,  $J$  = 7.6 Hz, 1H, -NH), 5.06-5.05 (s, 2H, Bn- $CH_2$ ), 4.87-4.85 (m, 1H, chiral-H), 4.17-4.12 (q, 2H, - $OCH_2$ ), 3.33-3.31 (m, 2H, - $CH_2$ ), 2.77-2.73 (t,  $J$  = 16 Hz, 2H, - $CH_2$ ), 1.90 (s, 3H, - $COCH_3$ ), 1.82-1.79 (t,  $J$  = 14 Hz, 2H, Ar- $CH_2$ ), 1.34 (s, 6H, - $(CH_3)_2$ ), 1.24-1.20 (t,  $J$  = 14.4 Hz, 3H, - $CH_3$ ); <sup>13</sup>C NMR (100 MHz,  $CDCl_3$ ) = 170.39, 169.75, 166.81, 160.01, 156.49, 155.94, 136.56, 129.98, 128.65, 128.12, 127.48, 113.78, 109.81, 104.39, 101.46, 75.09, 75.50, 62.00, 50.83, 32.74, 29.21, 26.81, 23.00, 21.50, 14.05; MS (ESI):  $m/z$  493 ( $M+1$ , 100).

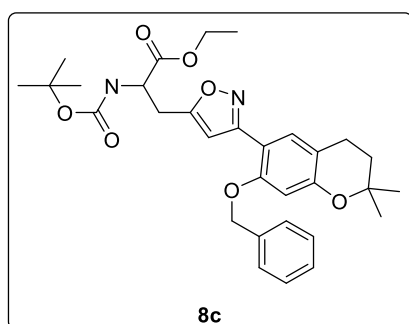

***Ethyl 3-(3-(7-(benzyloxy)-2,2-dimethylchroman-6-yl)isoxazol-5-yl)-2-((tert-butoxycarbonyl)amino)propanoate (8c):***MR: 149-152<sup>0</sup>C; IR (KBr,  $cm^{-1}$ ): 3347.6, 2977.2, 2930, 2864.4, 1736.9, 1708, 1600.9, 1519.9, 1457.2, 1384.9, 1290.4, 1220.9, 1167.9, 1116.8, 1060.8, 1019.4, 926.8, 732.9, 696.3; <sup>1</sup>H NMR (400 MHz,  $CDCl_3$ ):  $\delta$  = 7.64 (s, 1H, Ar-H), 7.40-7.32 (m, 5H, Ar-H), 6.51 (s, 1H, Ar-H), 6.48 (s, 1H, isoxazole-H), 5.22-5.20 (d,  $J$  = 8 Hz, 1H, -NH), 5.07 (s, 2H, Bn- $CH_2$ ), 4.61-4.59 (m, 1H, chiral-H), 4.15-4.09 (q, 2H, - $OCH_2$ ), 3.28-3.27 (d,  $J$  = 4.4 Hz, 2H, - $CH_2$ ), 2.76-2.73 (t,  $J$  = 13.2 Hz, 2H, - $CH_2$ ),

1.82-1.79 (t,  $J = 13.2$  Hz, 2H, Ar-CH<sub>2</sub>), 1.42 (s, 9H, -(CH<sub>3</sub>)<sub>3</sub>), 1.34 (s, 6H, -(CH<sub>3</sub>)<sub>2</sub>), 1.22-1.18(t,  $J = 14.4$  Hz, 3H, -CH<sub>3</sub>); <sup>13</sup>C NMR (100 MHz, CDCl<sub>3</sub>): = 170.67, 166.97, 160.0, 156.44, 155.92, 155.06, 136.58, 130.17, 129.86, 128.78, 128.46, 128.15, 127.83, 127.16, 113.77, 109.98, 104.44, 104.17, 101.68, 101.43, 80.13, 75.06, 70.48. 70.13, 61.78, 52.2, 52.06, 32.76, 29.27, 28.27, 28.21, 26.86, 26.77, 21.72, 21.51, 14.12. 13.98; MS (ESI): m/z 551 (M+1, 100).

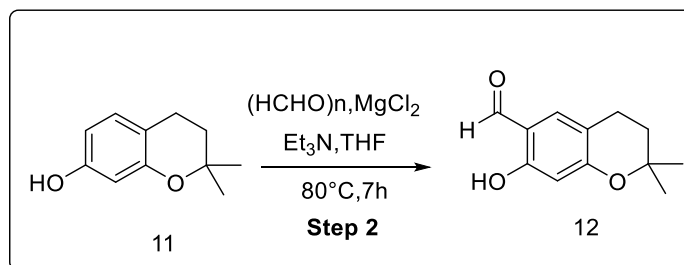

**Experimental procedure for the preparation of (7-hydroxy-2, 2-dimethylchromane-6-carbaldehyde)**

**(12):** To a stirred solution of compound **11** (1g, 5.617 mmol) in THF (30 ml), were added MgCl<sub>2</sub> (802 mg, 8.425 mmol) and triethylamine (2.892 ml, 20.782 mmol) at RT and stirred for 20 min. Then was added Para formaldehyde (3.145g, 37.92 mmol) and stirred for 1 h at RT followed by reflux for 7 h. The reaction was monitored by TLC analysis (10% ethyl acetate/pet ether). After completion of the reaction, THF was evaporated under reduced pressure and the reaction mixture was diluted with Ethyl acetate (100 ml) and passed through celite bed. Bed was washed with ethyl acetate (100 ml). Combined RM was washed with water (100 ml) and brine solution. Organic layer was dried over anhydrous Na<sub>2</sub>SO<sub>4</sub> and concentrated under reduced pressure to give the crude residue which was charged on silica gel column. The column was eluted with 5% ethyl acetate/pet ether to give the compound **12** (810 mg, 70% yield). <sup>1</sup>H NMR (400 MHz, CDCl<sub>3</sub>): δ 11.07 (s, 1H, -CHO), 9.66 (s, 1H, -OH), 7.21 (s, 1H, Ar-H), 6.31 (s, 1H, Ar-H), 2.77-2.73 (t,  $J = 13.2$  Hz, 2H, -CH<sub>2</sub>), 1.84-1.81 (t,  $J = 13.2$  Hz, 2H, Ar-CH<sub>2</sub>), 1.36 (s, 6H, -(CH<sub>3</sub>)<sub>2</sub>); MS (ESI): m/z 207 (M+1,100).

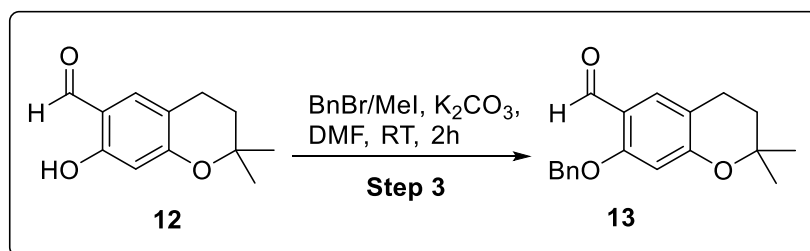

**Experimental procedure for the preparation of 7-(benzyloxy)-2, 2-dimethylchromane-6-carbaldehyde (13):**

To a stirred solution of compound **12** (400 mg, 1.951 mmol) in DMF (5 ml), were added K<sub>2</sub>CO<sub>3</sub> (538 mg, 3.902 mmol) and Benzyl bromide (0.243 ml, 2.048mmol), stirred for 2 h at RT. The reaction was monitored by TLC analysis (10% ethyl acetate/pet ether). After completion of

the reaction, the reaction mixture was diluted with Ethyl acetate (100 ml) and washed with water (100 ml) and brine solution. Organic layer was dried over anhydrous  $\text{Na}_2\text{SO}_4$  and concentrated under reduced pressure to give the crude residue which was charged on silica gel column. The column was eluted with 8% ethyl acetate/pet ether to give the compound **13** (550 mg, 95% yield).:  $^1\text{H NMR}$  (400 MHz,  $\text{CDCl}_3$ ):  $\delta$  10.36 (s, 1H, -CHO), 7.62 (s, 1H, Ar-H), 7.44-7.34 (m, 5H, Ar-H), 6.42 (s, 1H, Ar-H), 5.10 (s, 2H,  $-\text{OCH}_2$ ), 2.76-2.72 (t,  $J = 13.6$  Hz, 2H,  $-\text{CH}_2$ ), 1.83-1.79 (t,  $J = 13.6$  Hz, 2H, Ar- $\text{CH}_2$ ), 1.35 (s, 6H,  $-(\text{CH}_3)_2$ ); MS (ESI):  $m/z$  297 ( $\text{M}+1$ , 100).

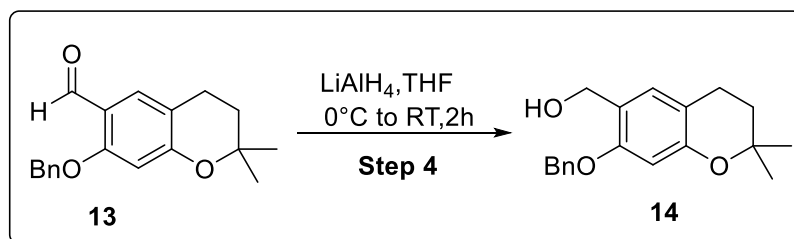

**Experimental procedure for the preparation of (7-(benzyloxy)-2,2-dimethylchroman-6-yl)methanol (14):** To a stirred solution of compound **13** (500mg, 1.689 mmol) in THF (10 ml) was added LAH (128.3 mg, 3.378 mmol (1M in THF)) at  $0^\circ\text{C}$  and stirred for 2 h at RT. The progress of the reaction was monitored by TLC analysis (10% ethyl acetate/pet ether). After completion of the reaction, the reaction mixture was diluted with ethyl acetate (100 ml) and washed with water and brine solution. Organic layer was dried over anhydrous  $\text{Na}_2\text{SO}_4$  and concentrated under reduced pressure to give the crude residue which was charged on silica gel column. The column was eluted with 15% ethyl acetate/pet ether to give the compound **14** (420 mg, 83% yield) as off white solid.

$^1\text{H NMR}$  (400 MHz,  $\text{CDCl}_3$ ):  $\delta$  7.40-7.33 (m,  $J = 29.6$  Hz, 5H, Ar-H), 6.96 (s, 1H, Ar-H), 6.43 (s, 1H, Ar-H), 5.03 (s, 2H,  $-\text{OCH}_2$ ), 4.63-4.62 (d,  $J = 5.6$  Hz, 2H,  $-\text{OCH}_2$ ), 2.71-2.68 (t,  $J = 13.2$  Hz, 2H,  $-\text{CH}_2$ ), 2.15 (bs, 1H,  $-\text{OH}$ ), 1.79-1.76 (t,  $J = 13.6$  Hz, 2H, Ar- $\text{CH}_2$ ), 1.32 (s, 6H,  $-(\text{CH}_3)_2$ ); MS (APCI):  $m/z$  280 ( $[\text{M}-\text{OH}]^+$ , 100).

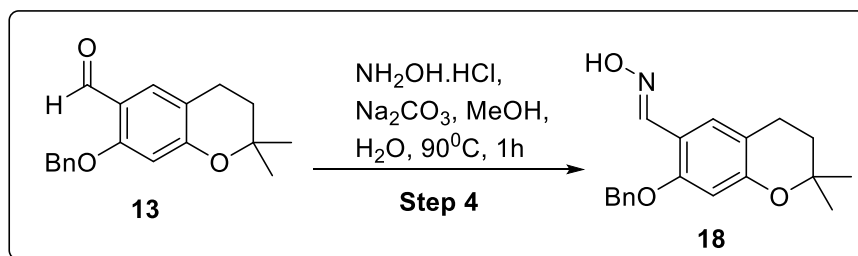

**Experimental procedure for the preparation of (E)-7-(benzyloxy)-2,2-dimethylchroman-6-carbaldehyde oxime (18):** To a stirred solution of compound **13** (400mg, 1.35 mmol) in Methanol: water (16:4 ml) were added  $\text{NH}_2\text{OH}\cdot\text{HCl}$  (111.8 mg, 1.62 mmol), and  $\text{Na}_2\text{CO}_3$  (171 mg, 1.62mmol) and heated at  $90^\circ\text{C}$  for 1 h. The progress of the reaction was monitored by TLC analysis (20% ethyl



acetate/pet ether). After completion of the reaction, the reaction mixture was concentrated under reduced pressure. Water was added to reaction mixture, white solid was precipitated. Filtered the precipitate and dried under vacuum to give the compound **18** (300 mg, 71% yield) as off white solid.; <sup>1</sup>H NMR (400 MHz, CDCl<sub>3</sub>): δ = 8.48 (s, 1H, -N=CH), 7.48 (s, 1H, Ar-H), 7.40-7.32 (m, 5H, Ar-H), 7.03 (s, 1H, -OH), 6.41 (s, 1H, Ar-H), 5.01 (s, 2H, Bn-CH<sub>2</sub>), 2.73-2.70 (t, *J* = 10.8 Hz, 2H, -CH<sub>2</sub>), 1.80-1.77 (t, *J* = 13.2 Hz, 2H, Ar-CH<sub>2</sub>), 1.33 (s, 6H, -(CH<sub>3</sub>)<sub>2</sub>). MS (ESI): *m/z* 312 (M+1, 100).

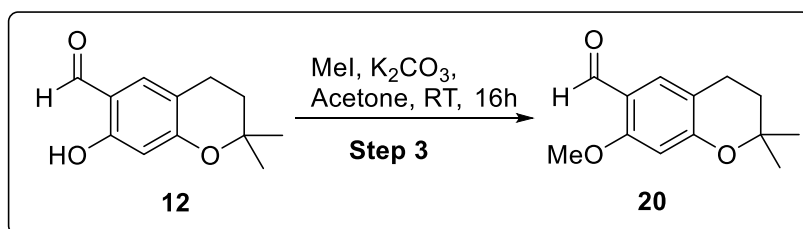

**Experimental procedure for the preparation of 7-hydroxy-2, 2-dimethylchromane-6-carbaldehyde (20):** To a stirred solution of compound **12** (2.5 g, 12.135 mmol) in Acetone (25 ml) were added K<sub>2</sub>CO<sub>3</sub> (5.02 g, 36.20 mmol) and CH<sub>3</sub>I (1.87 ml, 29.12 mmol) at 0°C and stirred at RT for 16 h. The progress of the reaction was monitored by TLC analysis (10% ethyl acetate/pet ether). After completion of the reaction, the reaction mixture was diluted with ethyl acetate (250 ml) and washed with water and brine solution. Organic layer was dried over anhydrous Na<sub>2</sub>SO<sub>4</sub> and concentrated under reduced pressure to give the crude residue which was charged on silica gel column. The column was eluted with 5% ethyl acetate/pet ether to give the compound **20** (2.4 g, 90% yield).

<sup>1</sup>H NMR (400 MHz, CDCl<sub>3</sub>): δ = 10.26 (s, 1H, -CHO), 7.59 (s, 1H, Ar-H), 6.34 (s, 1H, Ar-H), 3.84 (s, 3H, -OCH<sub>3</sub>), 2.75-2.72 (t, *J* = 13.2 Hz, 2H, -CH<sub>2</sub>), 1.83-1.79 (t, *J* = 14 Hz, 2H, Ar-CH<sub>2</sub>), 1.35 (s, 6H, -(CH<sub>3</sub>)<sub>2</sub>); MS (ESI): *m/z* 221 (M+1, 100).

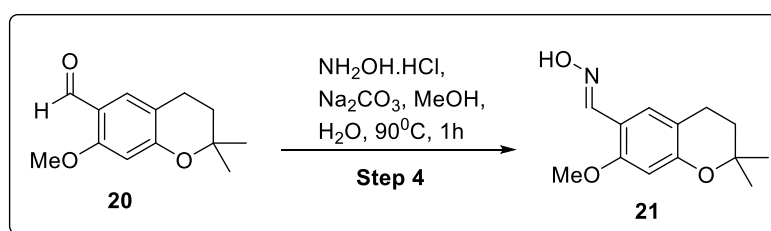

**Experimental procedure for the preparation of (E)-7-methoxy-2, 2-dimethylchromane-6-carbaldehyde oxime (21):** To a stirred solution of compound **20** (2.2g, 10 mmol) in Methanol and water (20:5 ml) were added NH<sub>2</sub>OH.HCl (820.5 mg, 11.891 mmol) and Na<sub>2</sub>CO<sub>3</sub> (1.26 g, 11.891mmol) and heated at 90°C for 1 h. The progress of the reaction was monitored by TLC analysis (20% ethyl acetate/pet ether). The reaction mixture was concentrated under reduced pressure. Water was added to reaction the mixture, white solid was precipitated. Filtered the precipitate and dried under vacuum to give the compound **21** (2g, 85% yield) as off white solid.; <sup>1</sup>H NMR (400 MHz, CDCl<sub>3</sub>): δ = 8.38 (s,

1H, -N=CH), 7.80 (bs, 1H, -OH), 7.38 (s, 1H, Ar-H), 6.33 (s, 1H, Ar-H), 3.78 (s, 3H, -OCH<sub>3</sub>), 2.72-2.69 (t, *J* = 13.2 Hz, 2H, -CH<sub>2</sub>), 1.80-1.77 (t, *J* = 13.2 Hz, 2H, Ar-CH<sub>2</sub>), 1.34 (s, 6H, -(CH<sub>3</sub>)<sub>2</sub>); MS (ESI): *m/z* 236 (*M*+1, 100).

GVK-RAG-1-51

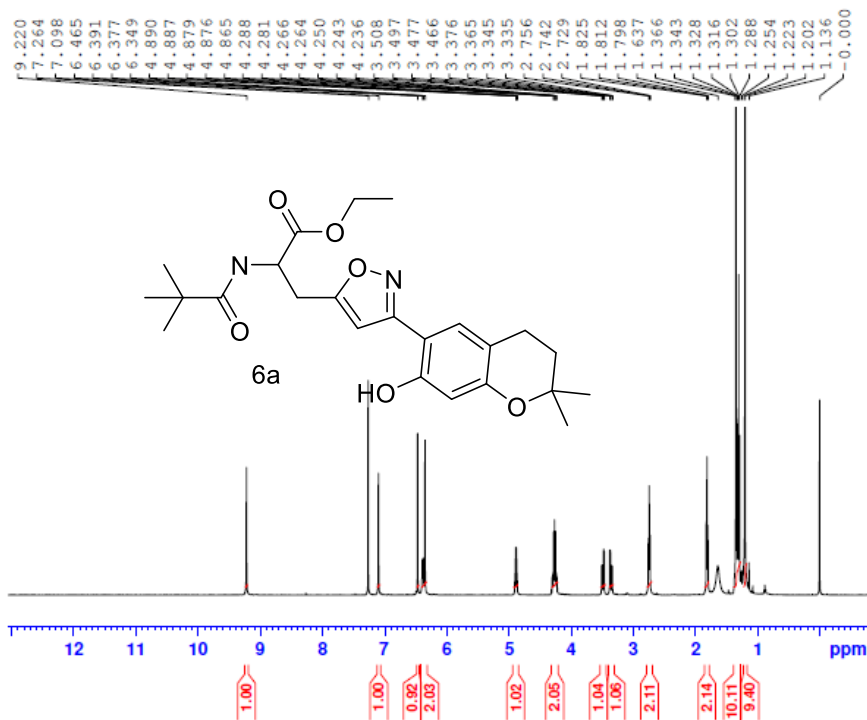

Current Data Parameters  
 NAME 51805A6233  
 EXPNO 1  
 PROCNO 1

F2 - Acquisition Parameters  
 Date\_ 20180607  
 Time 21.28 h  
 INSTRUM spect  
 PROBHD Z119470\_0294 (zg30)  
 PULPROG zg30  
 TD 65536  
 SOLVENT CDCl3  
 NS 8  
 DS 0  
 SWH 10000.000 Hz  
 FIDRES 0.152588 Hz  
 AQ 3.2767999 sec  
 RG 111.07  
 DW 50.000 usec  
 DE 6.50 usec  
 TE 298.2 K  
 D1 1.00000000 sec  
 TDO 1  
 SFO1 500.1330885 MHz  
 NUC1 1H  
 P1 10.00 usec  
 PIW1 20.38699913 W

F2 - Processing parameters  
 SI 65536  
 SF 500.1300100 MHz  
 WDW EM  
 SSB 0  
 LB 0.30 Hz  
 GB 0  
 PC 1.00

GVK-RAG-1-51

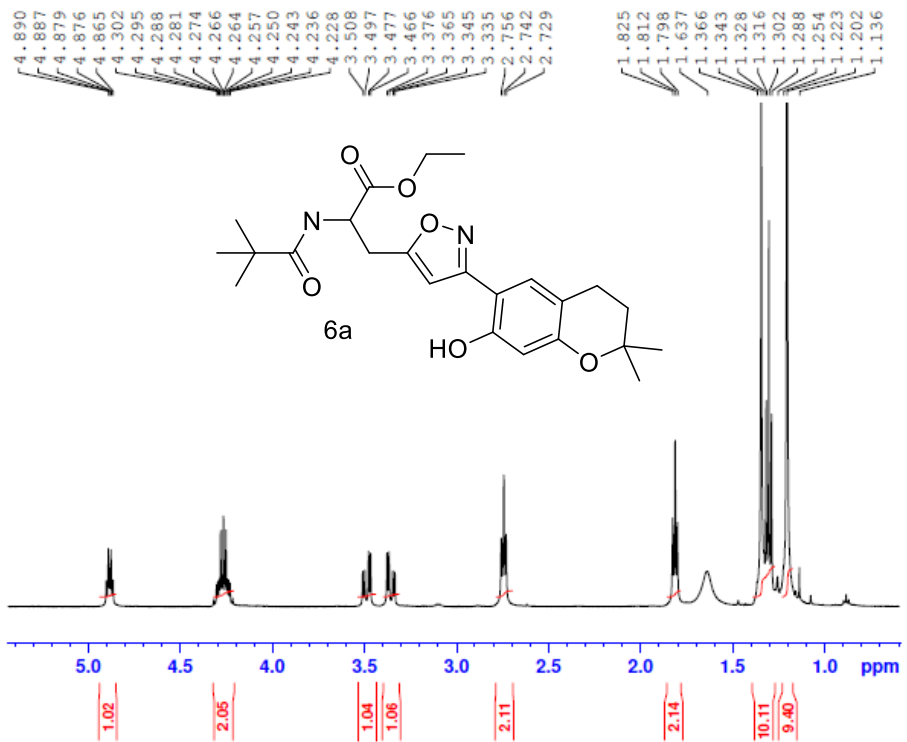

Current Data Parameters  
 NAME 51805A6233  
 EXPNO 1  
 PROCNO 1

F2 - Acquisition Parameters  
 Date\_ 20180607  
 Time 21.28 h  
 INSTRUM spect  
 PROBHD Z119470\_0294 (zg30)  
 PULPROG zg30  
 TD 65536  
 SOLVENT CDCl3  
 NS 8  
 DS 0  
 SWH 10000.000 Hz  
 FIDRES 0.152588 Hz  
 AQ 3.2767999 sec  
 RG 111.07  
 DW 50.000 usec  
 DE 6.50 usec  
 TE 298.2 K  
 D1 1.00000000 sec  
 TDO 1  
 SFO1 500.1330885 MHz  
 NUC1 1H  
 P1 10.00 usec  
 PIW1 20.38699913 W

F2 - Processing parameters  
 SI 65536  
 SF 500.1300100 MHz  
 WDW EM  
 SSB 0  
 LB 0.30 Hz  
 GB 0  
 PC 1.00

GVK-RAG-1-51

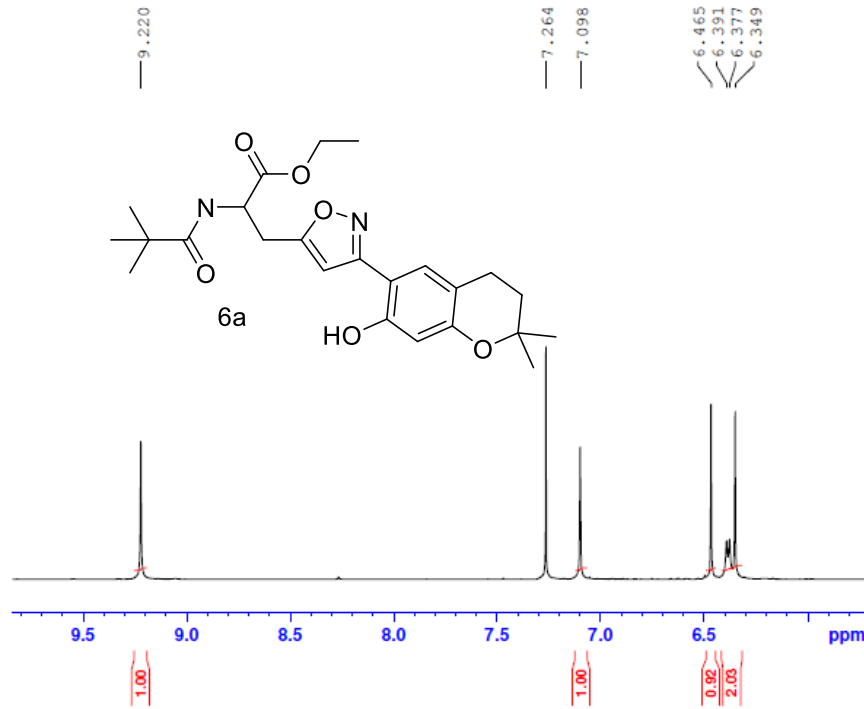

```

Current Data Parameters
NAME      51806A6233
EXPNO    1
PROCNO   1

F2 - Acquisition Parameters
Date_    20180607
Time     21.28 h
INSTRUM  spect
PROBHD   Z119470_0294 (
PULPROG  zg30
TD        65536
SOLVENT  CDCl3
NS        8
DS        10000.000 Hz
SWH       0.152588 Hz
FIDRES    3.2767999 sec
AQ         111.07
RG         50.000 usec
DE         6.50 usec
TE         298.2 K
D1         1.00000000 sec
D11        1
SFO1      500.1330885 MHz
NUC1       1H
P1         10.00 usec
PIW1      20.38699913 W

F2 - Processing parameters
SI         65536
SF         500.1300100 MHz
WVW        EM
SSB         0
LB          0.30 Hz
GB          0
PC          1.00
    
```

GVK-RAG-1-51

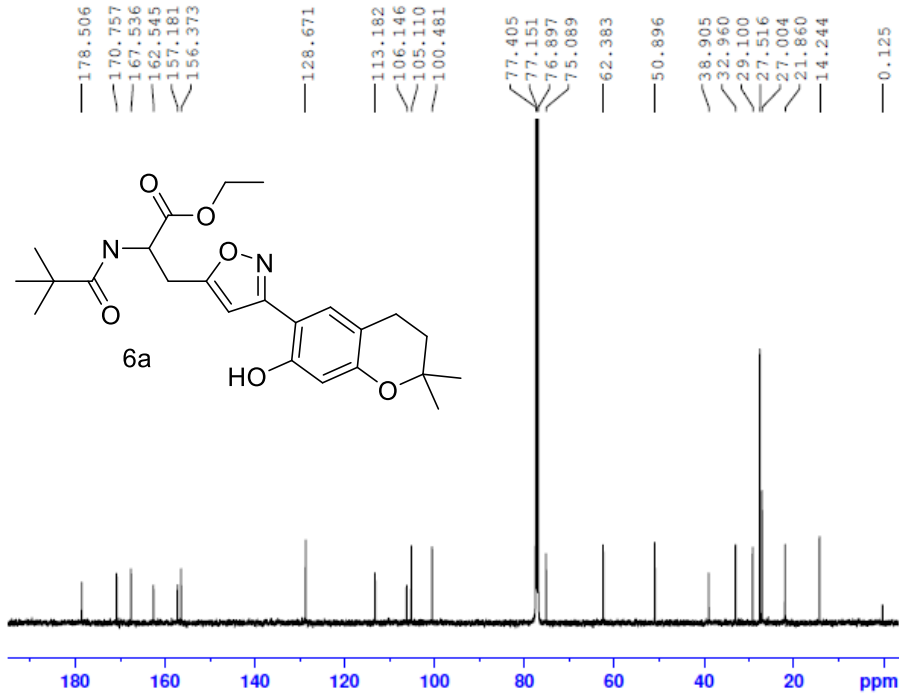

```

Current Data Parameters
NAME      511806A6233
EXPNO    2
PROCNO   1

F2 - Acquisition Parameters
Date_    20180607
Time     22.48 h
INSTRUM  spect
PROBHD   Z119470_0294 (
PULPROG  zgpg30
TD        65536
SOLVENT  CDCl3
NS        1024
DS        4
SWH       29761.904 Hz
FIDRES    0.454131 Hz
AQ         1.1010048 sec
RG         197.72
DE         16.800 usec
TE         298.2 K
D1         3.00000000 sec
D11        0.03000000 sec
D12        1
SFO1      125.7703643 MHz
NUC1       13C
P1         10.00 usec
PIW1      79.88800049 W
SFO2      500.1320005 MHz
NUC2       1H
CPDPRG2  waltz16
PCPD2     90.00 usec
PIW2      20.38699913 W
PIW12     0.25169000 W
PIW13     0.16023000 W

F2 - Processing parameters
SI         32768
SF         125.7577726 MHz
WVW        EM
SSB         0
LB          2.00 Hz
GB          0
PC          1.40
    
```

GVK-RAG-1-51

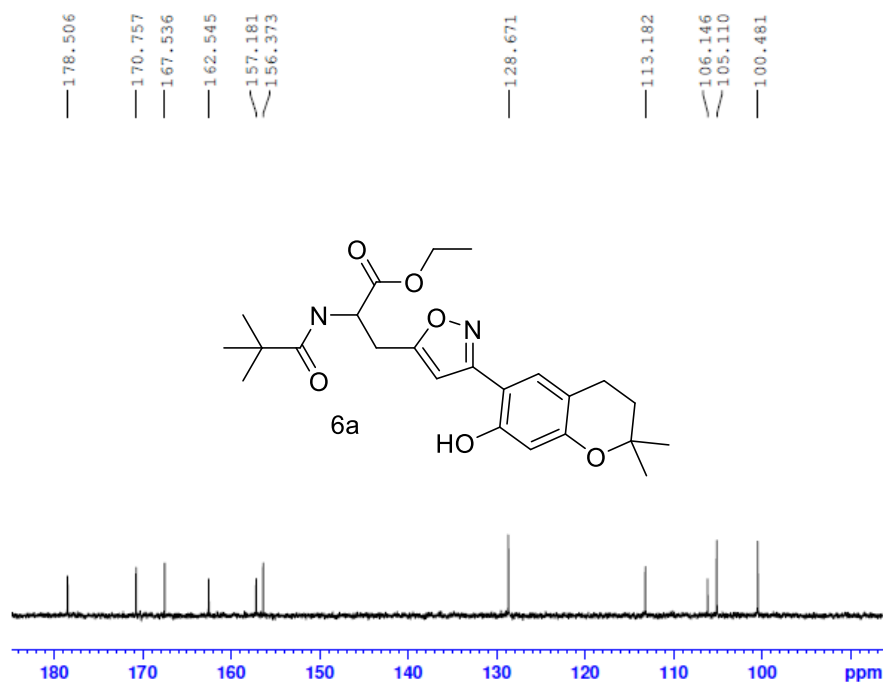

```

Current Data Parameters
NAME      511806A6233
EXPNO    2
PROCNO   1

F2 - Acquisition Parameters
Date_    20180607
Time     22.48 h
INSTRUM  spect
PROBHD   Z119470_0294 (
PULPROG  zgpg30
TD        65536
SOLVENT  CDCl3
NS        1024
DS        4
SWH       29761.904 Hz
FIDRES    0.454131 Hz
AQ        1.1010048 sec
RG        197.72
DW        16.800 usec
DE        6.50 usec
TE        298.2 K
D1        3.0000000 sec
D11       0.0300000 sec
TDO       1
SF01      125.7703643 MHz
NUC1      13C
P1        10.00 usec
PIW1      79.8880049 W
SF02      500.1320005 MHz
NUC2      1H
CPDPRG2   waltz16
PCPD2     90.00 usec
PIW2      20.3869913 W
PIW12     0.25169000 W
PIW13     0.16023000 W

F2 - Processing parameters
SI         32768
SF         125.7577726 MHz
WVW        EM
SSB        0
LB         2.00 Hz
GB         0
PC         1.40
    
```

GVK-RAG-1-51

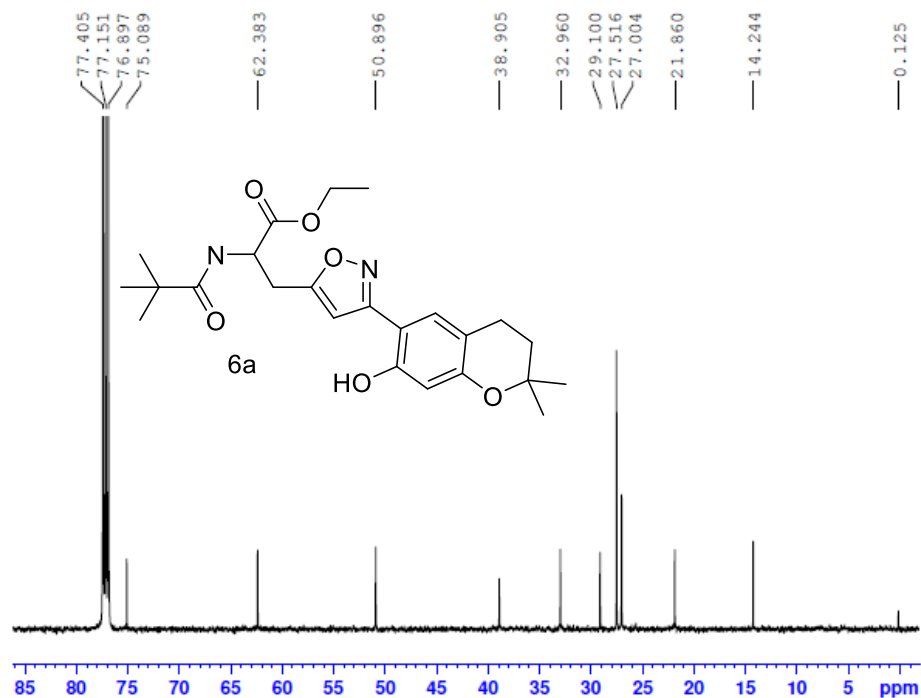

```

Current Data Parameters
NAME      511806A6233
EXPNO    2
PROCNO   1

F2 - Acquisition Parameters
Date_    20180607
Time     22.48 h
INSTRUM  spect
PROBHD   Z119470_0294 (
PULPROG  zgpg30
TD        65536
SOLVENT  CDCl3
NS        1024
DS        4
SWH       29761.904 Hz
FIDRES    0.454131 Hz
AQ        1.1010048 sec
RG        197.72
DW        16.800 usec
DE        6.50 usec
TE        298.2 K
D1        3.0000000 sec
D11       0.0300000 sec
TDO       1
SF01      125.7703643 MHz
NUC1      13C
P1        10.00 usec
PIW1      79.8880049 W
SF02      500.1320005 MHz
NUC2      1H
CPDPRG2   waltz16
PCPD2     90.00 usec
PIW2      20.3869913 W
PIW12     0.25169000 W
PIW13     0.16023000 W

F2 - Processing parameters
SI         32768
SF         125.7577726 MHz
WVW        EM
SSB        0
LB         2.00 Hz
GB         0
PC         1.40
    
```

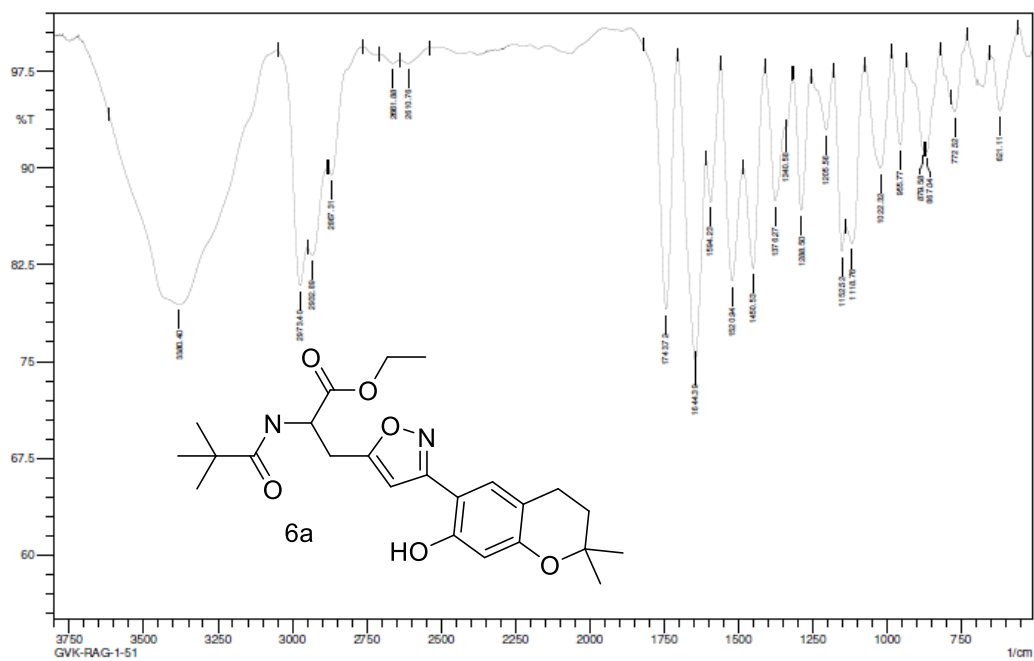

Comment: IN Kbr  
GVK-RAG-1-51

No. of Scans:  
Resolution:  
Apodization:

Date: 6/8/2018 12:57:05 PM  
User: Admin

GVK BIOSCIENCES PVT. LTD.  
 MEDICINAL CHEMISTRY LABORATORY - ANALYTICAL RESEARCH  
 LCMS REPORT

```

=====
Date of Analysis : 6/7/2018           7:09:28 PM           Vial position : P1-B-05
Acq. Method      : RND-FA-4.01 MIN      Injection Vol  : 1.000µl
Sample Name      : GVK-RAG-1-51         Instrument ID  : ANL-MCL5-LCMS-001
=====
    
```

```

=====
RND-FA 4.01 MIN.M
Column          : ACQUITY UPLC BEH C18 (50mmx2.1mm, 1.7µm)
Mobile Phase    : B1: 0.1 % FA IN WATER A1: 0.1%FA IN ACN
Gradient        : Time (min) /%B1: 0/3, 0.3/3, 2.3/98,3.5/98,4/3,4.01/3
Column Flow     : 0.6 ml/min
Column Temp     : 50°C
=====
    
```

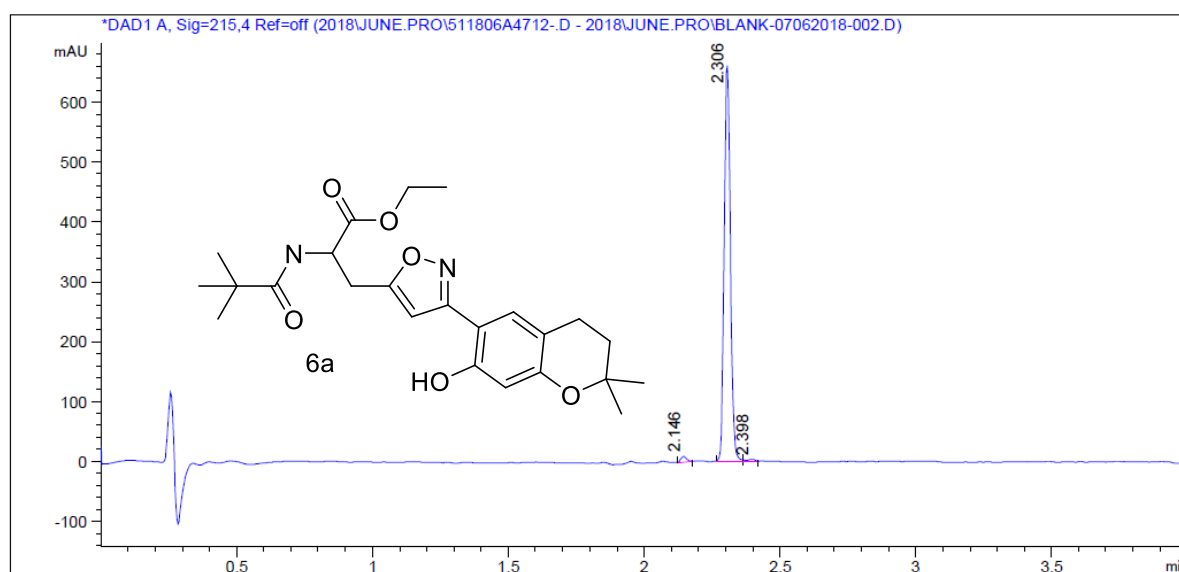

DAD1 A, Sig=215,4 Ref=off

| Peak No | RT min | Height  | Area     | Area % |
|---------|--------|---------|----------|--------|
| 1       | 2.15   | 9.722   | 14.902   | 1.380  |
| 2       | 2.31   | 666.513 | 1056.928 | 97.900 |
| 3       | 2.40   | 3.570   | 7.768    | 0.720  |

MS Spectrum

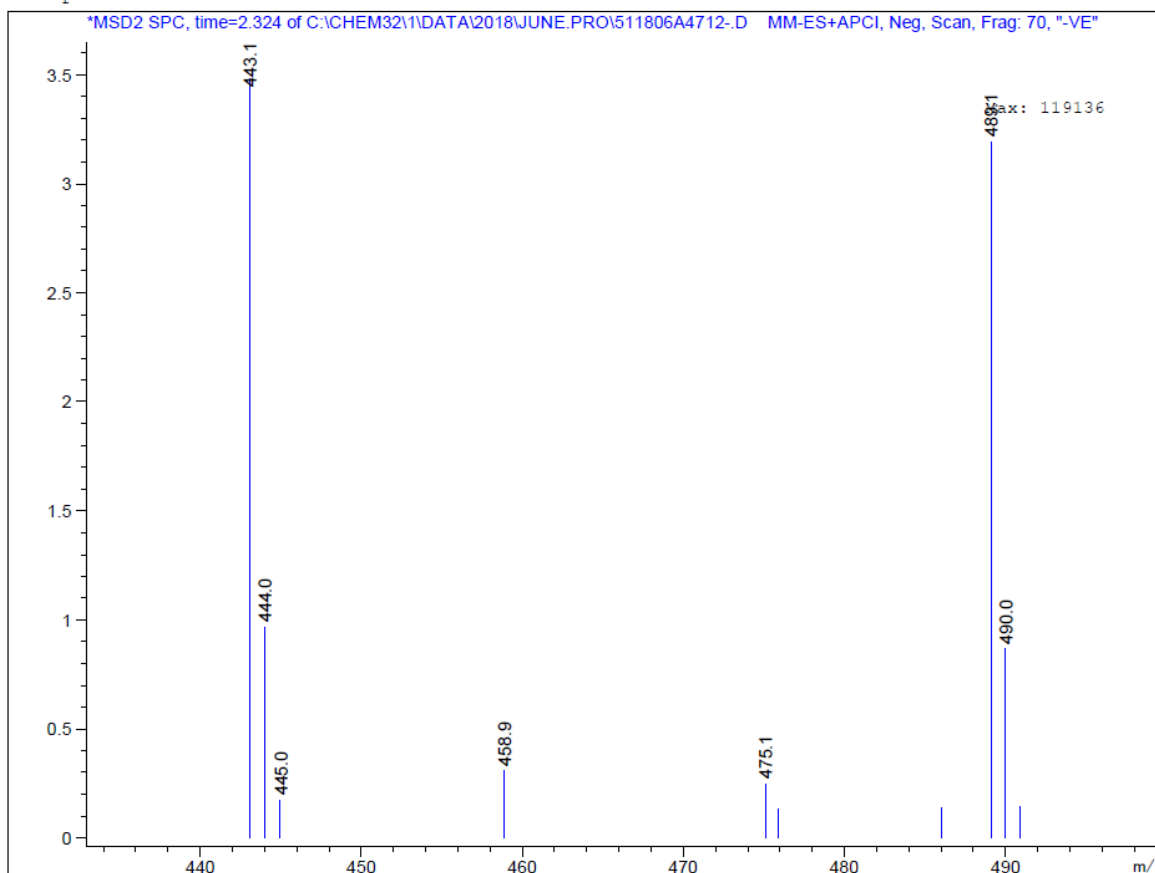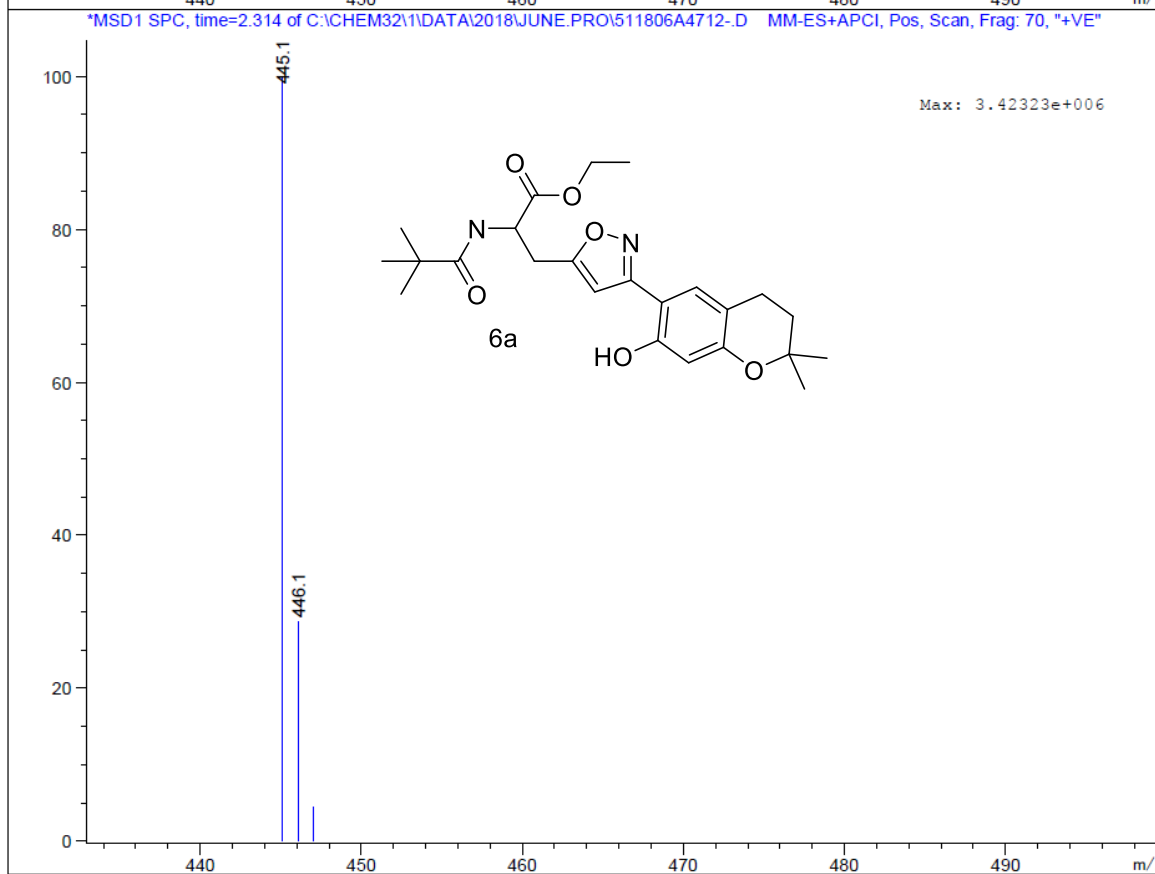



GVK-RAG-2-56

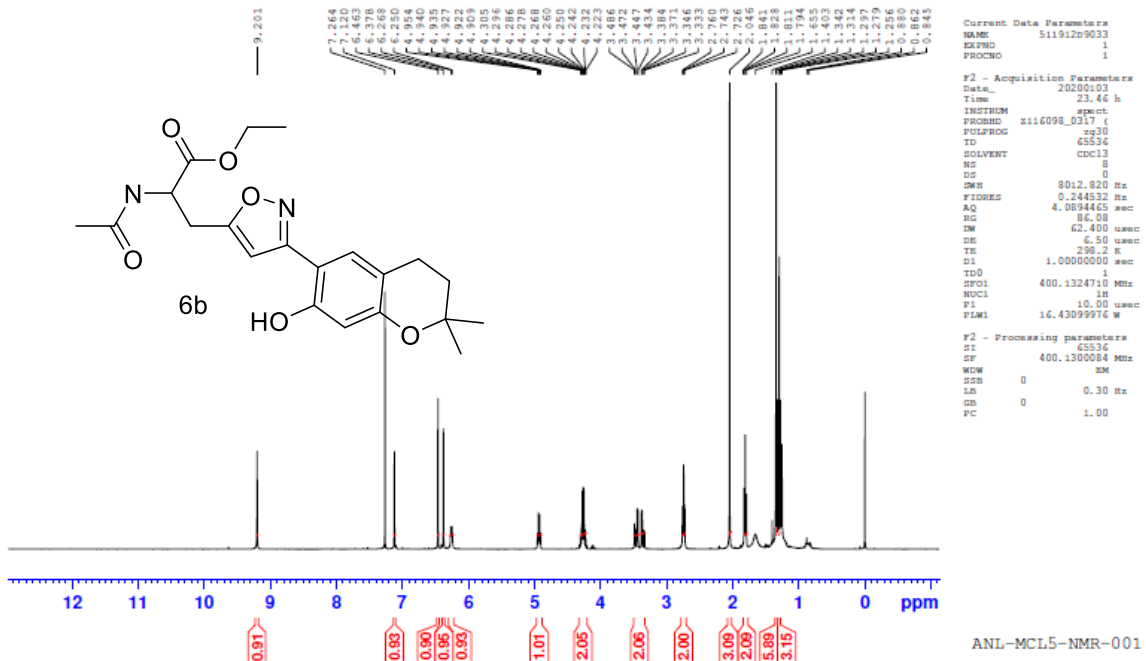

GVK-RAG-2-56

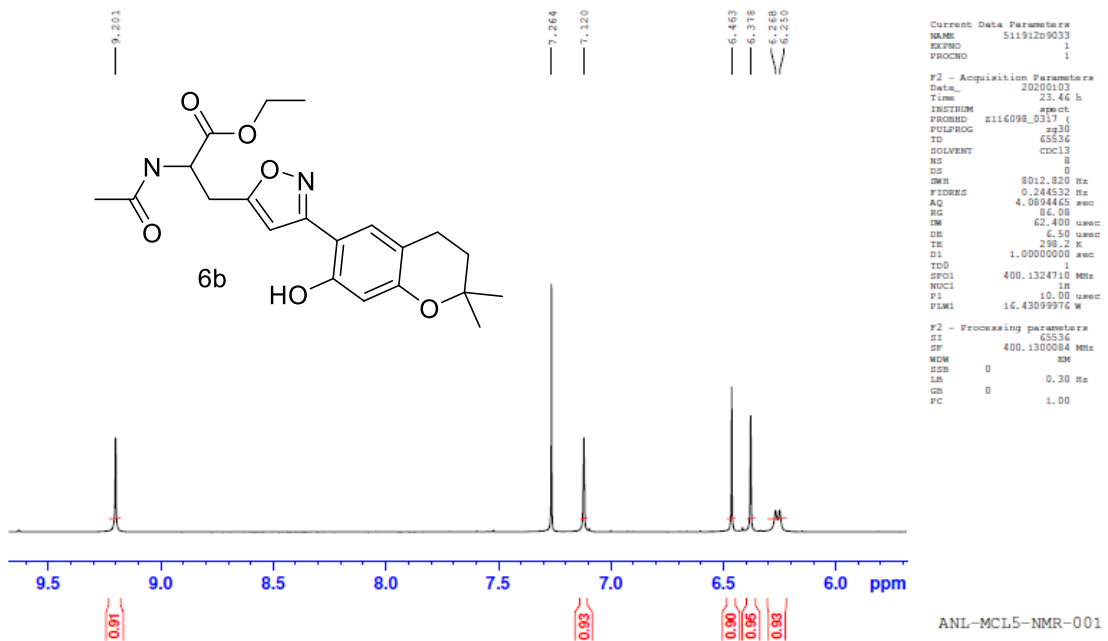

GVK-RAG-2-56

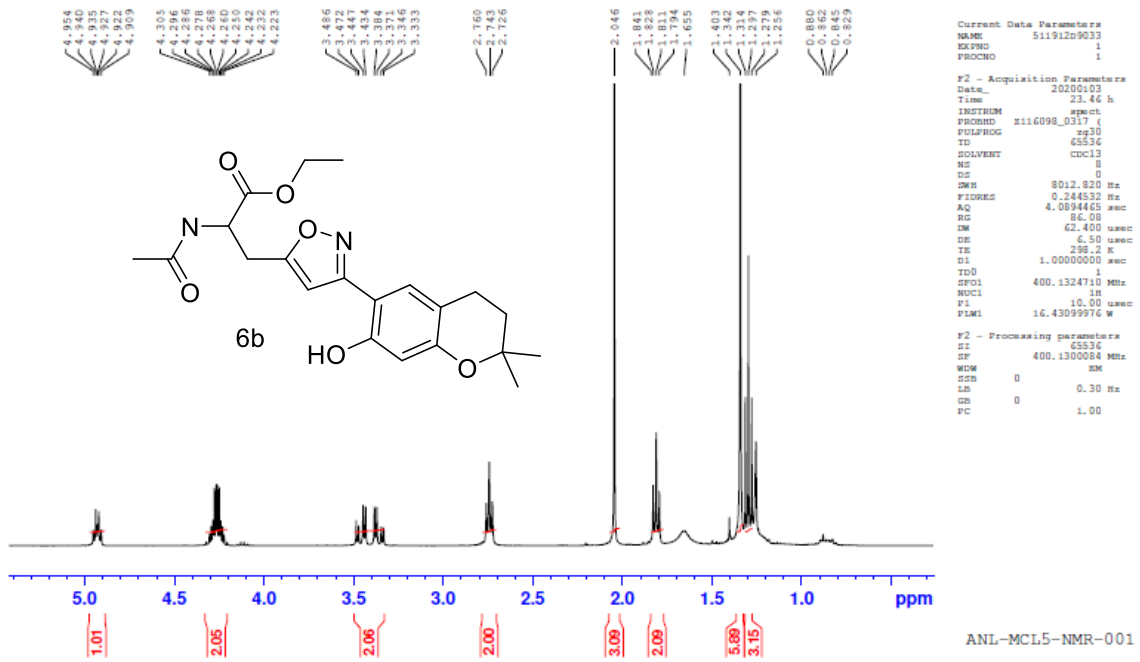

GVK-RAG-2-56

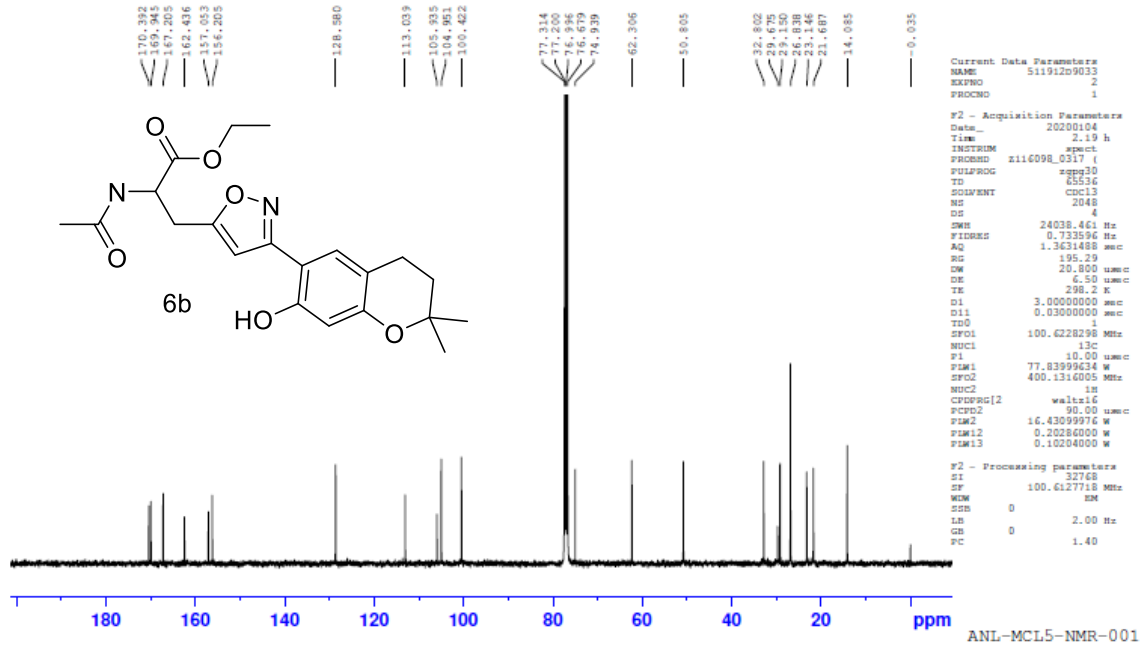

GVK-RAG-2-56

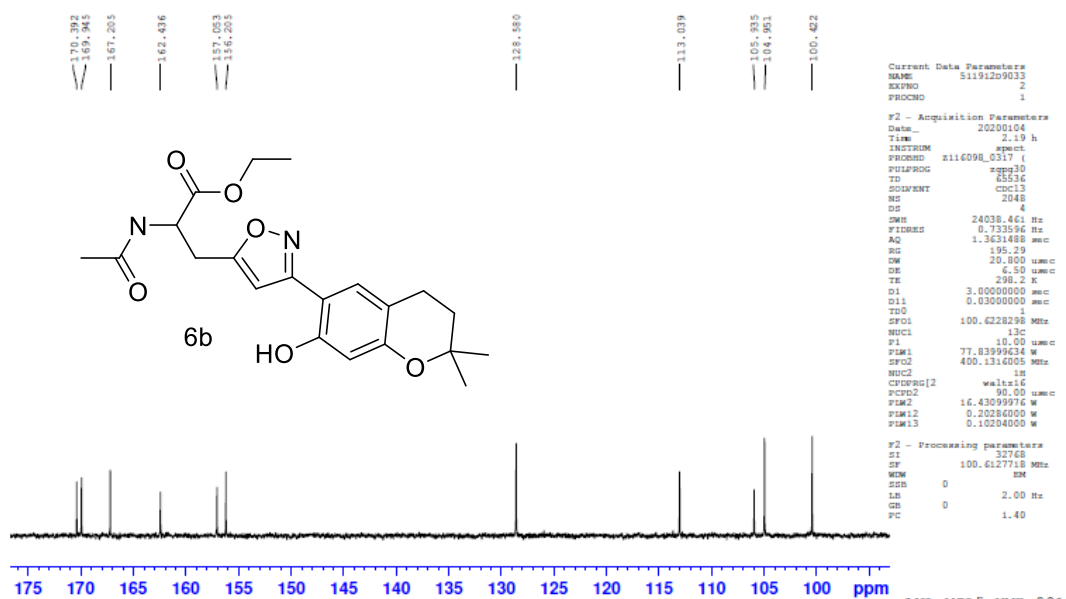

GVK-RAG-2-56

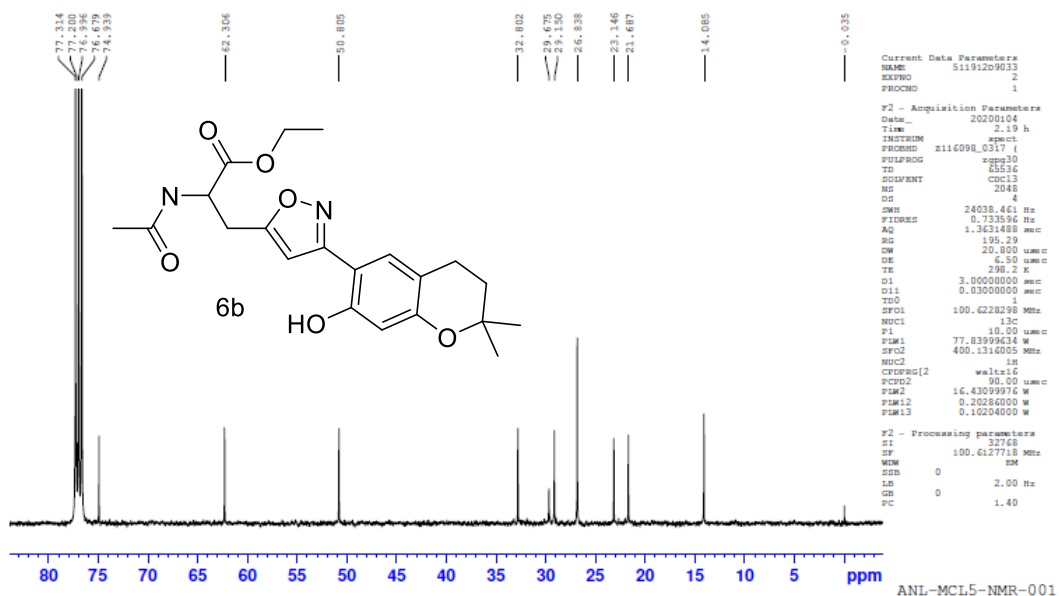

GVK BIOScience Private Limited  
Discovery Chemistry- Analytical Services

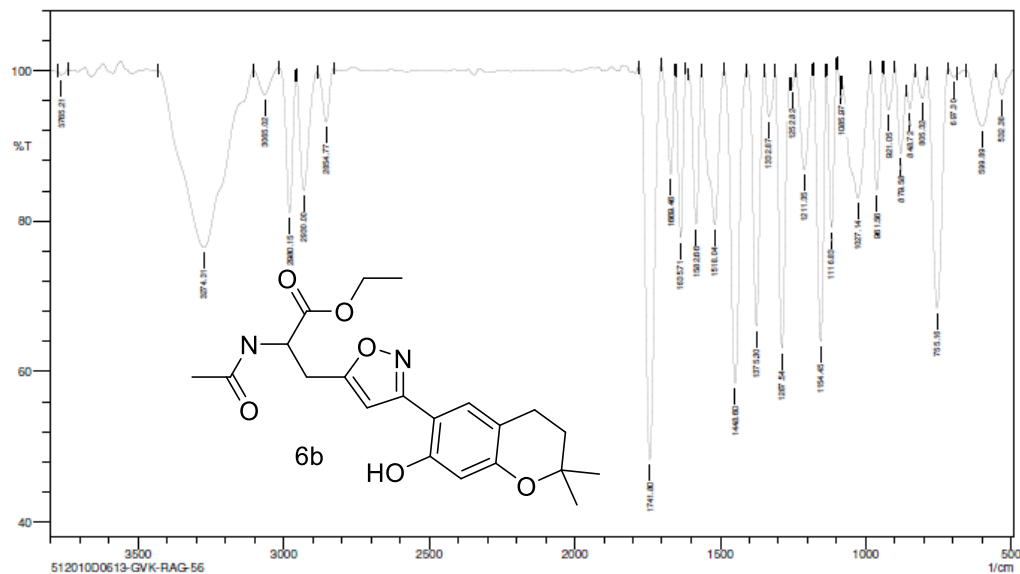

Sample Name:  
512010D0613-GVK-RAG-56

No. of Scans:

Date/Time: 10/31/2020 2:41:49 PM

User: GVKBIO

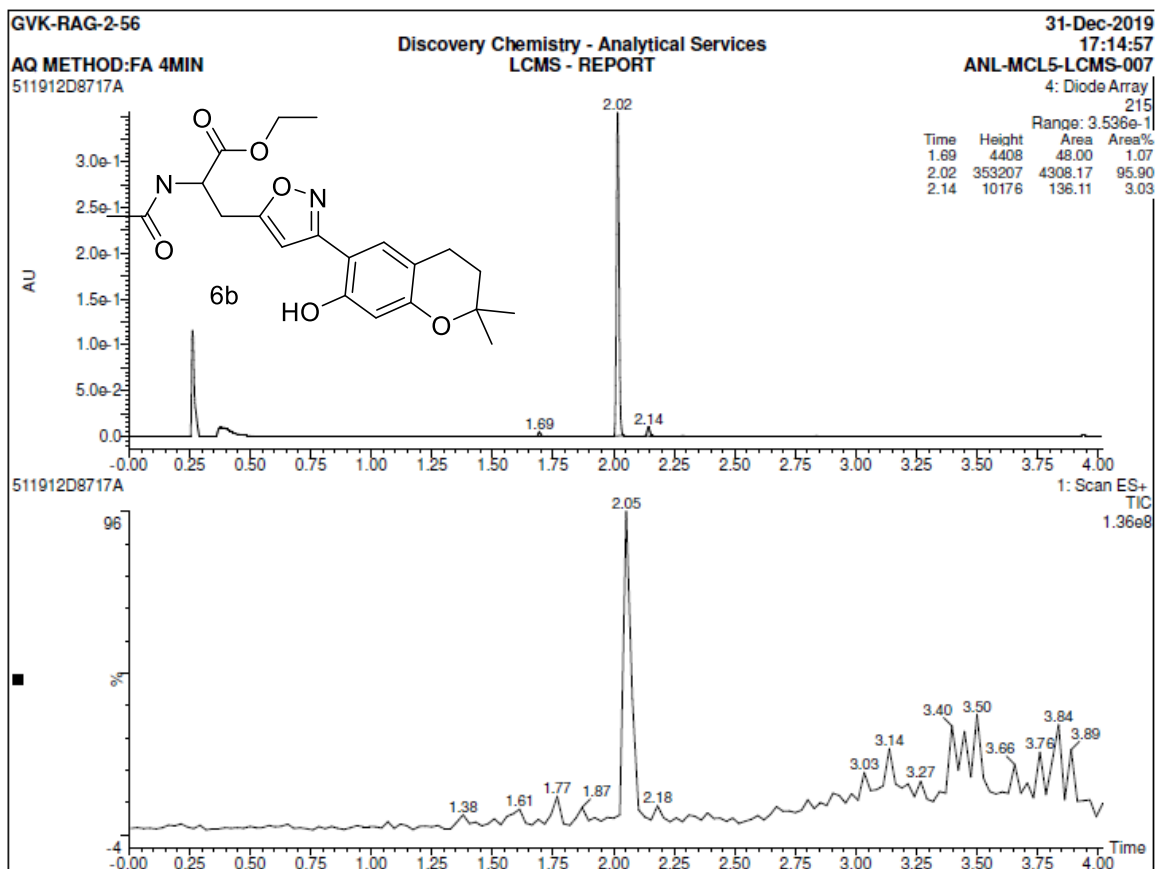

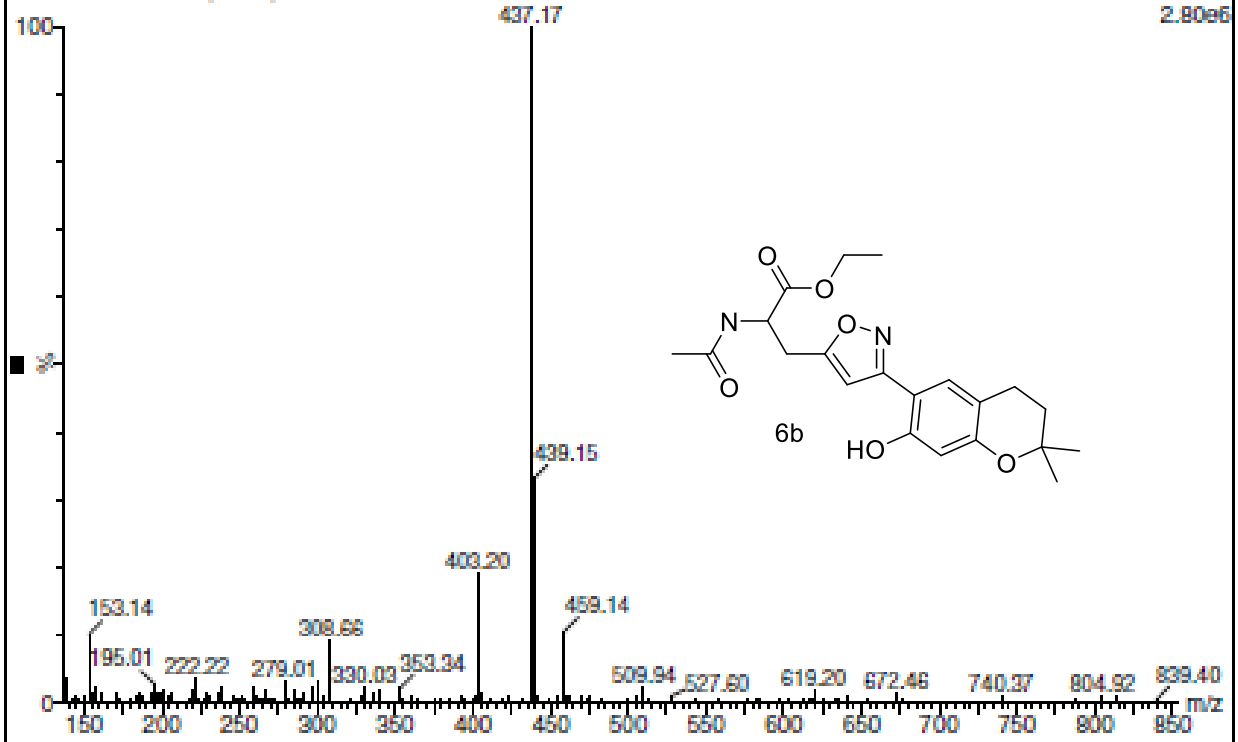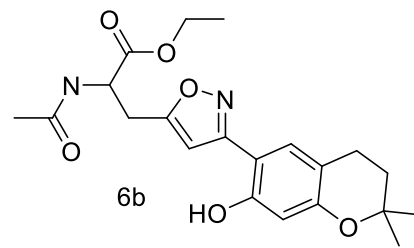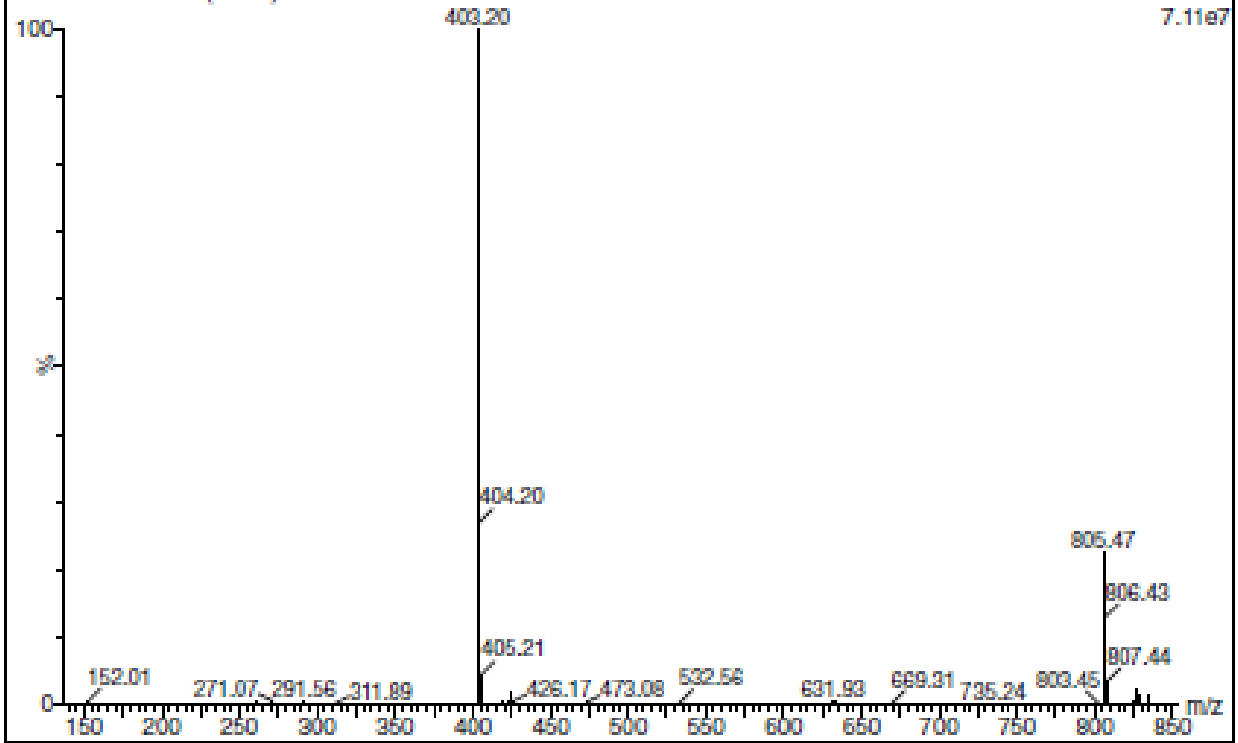

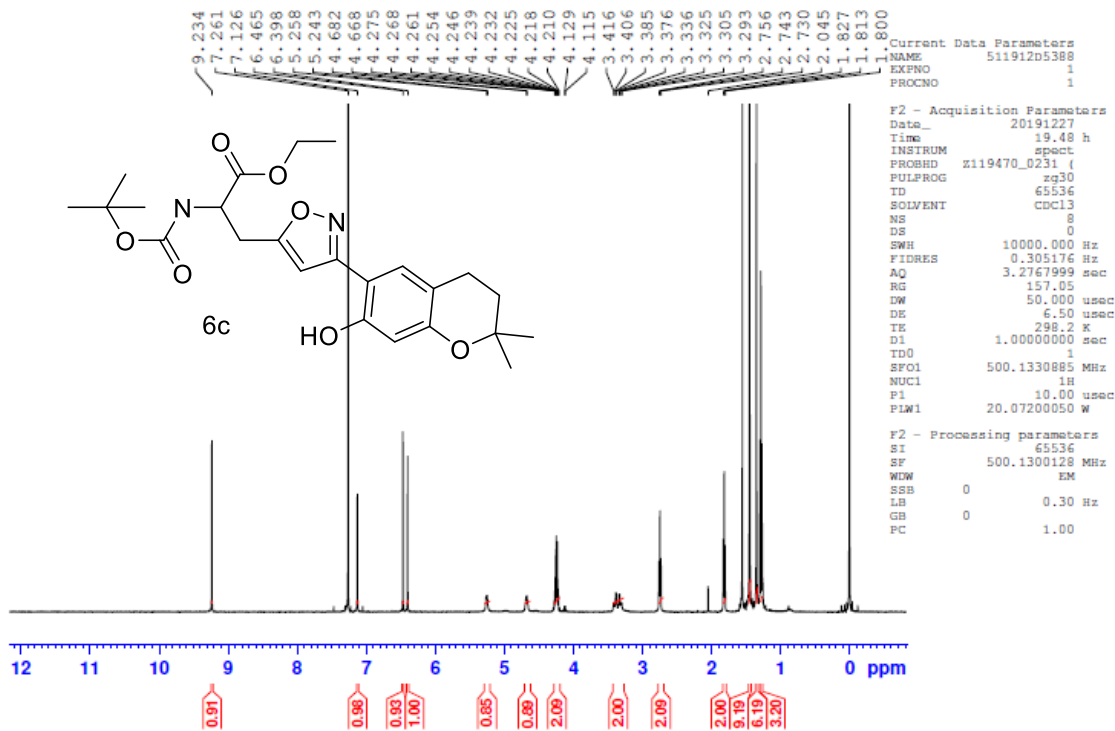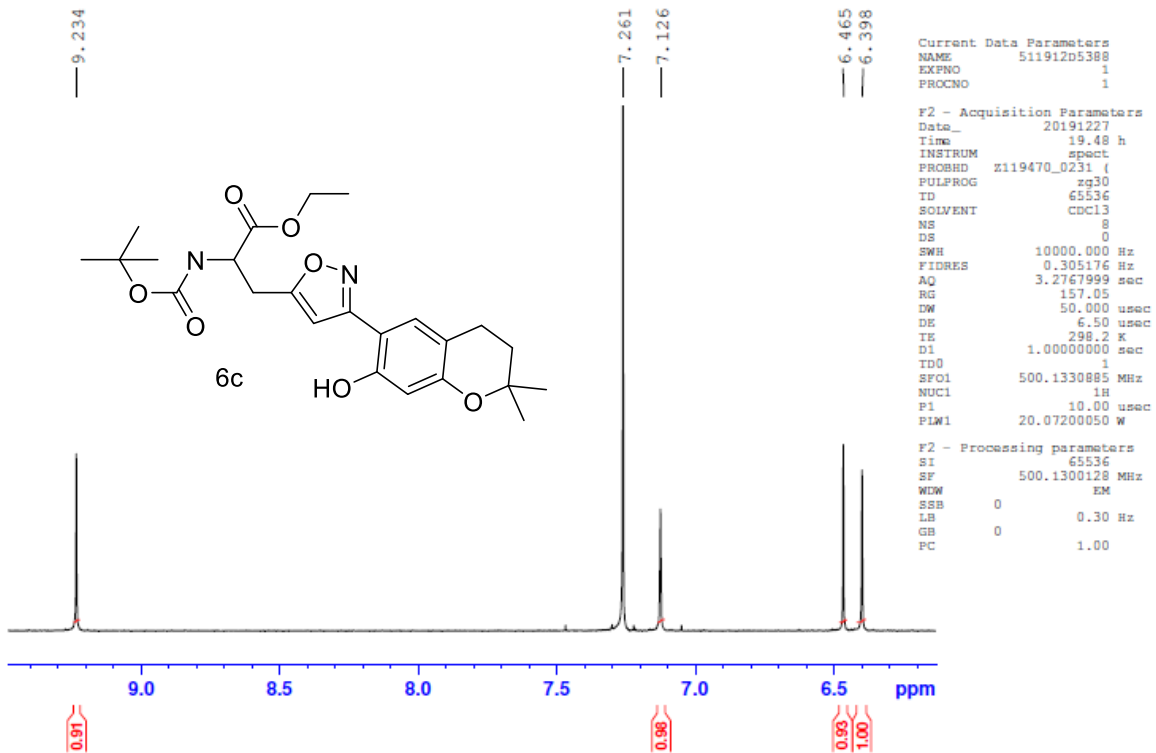

GVK-RAG-2-53

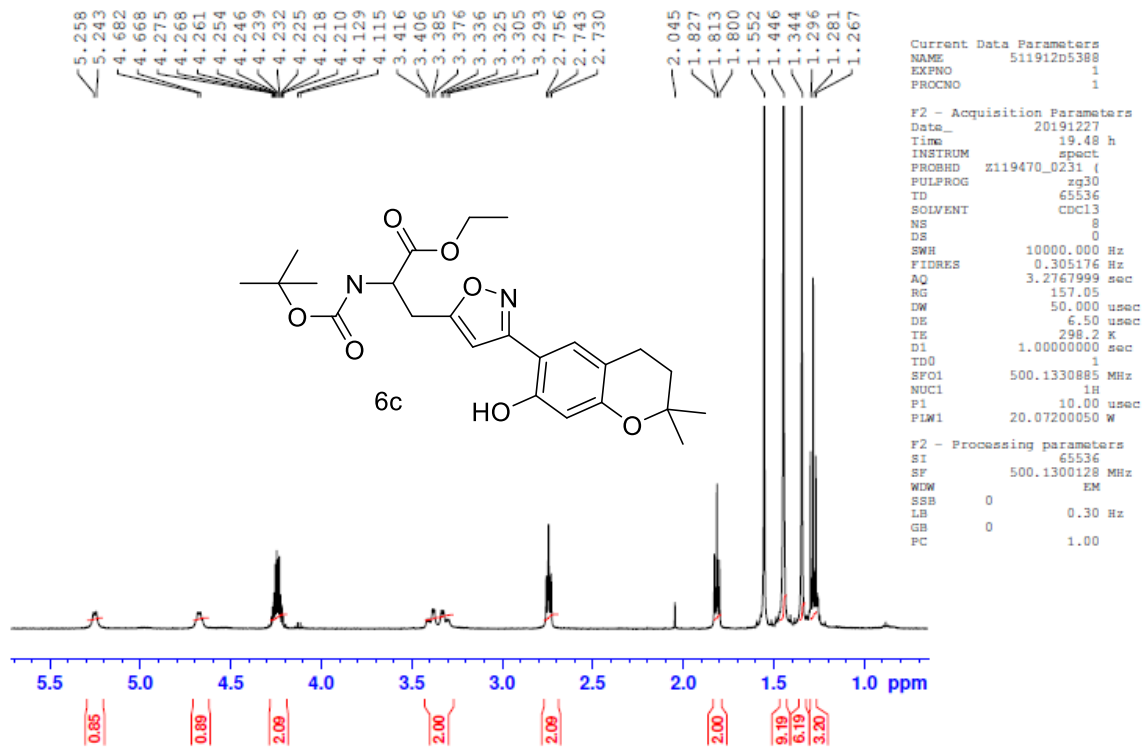

GVK-RAG-2-53

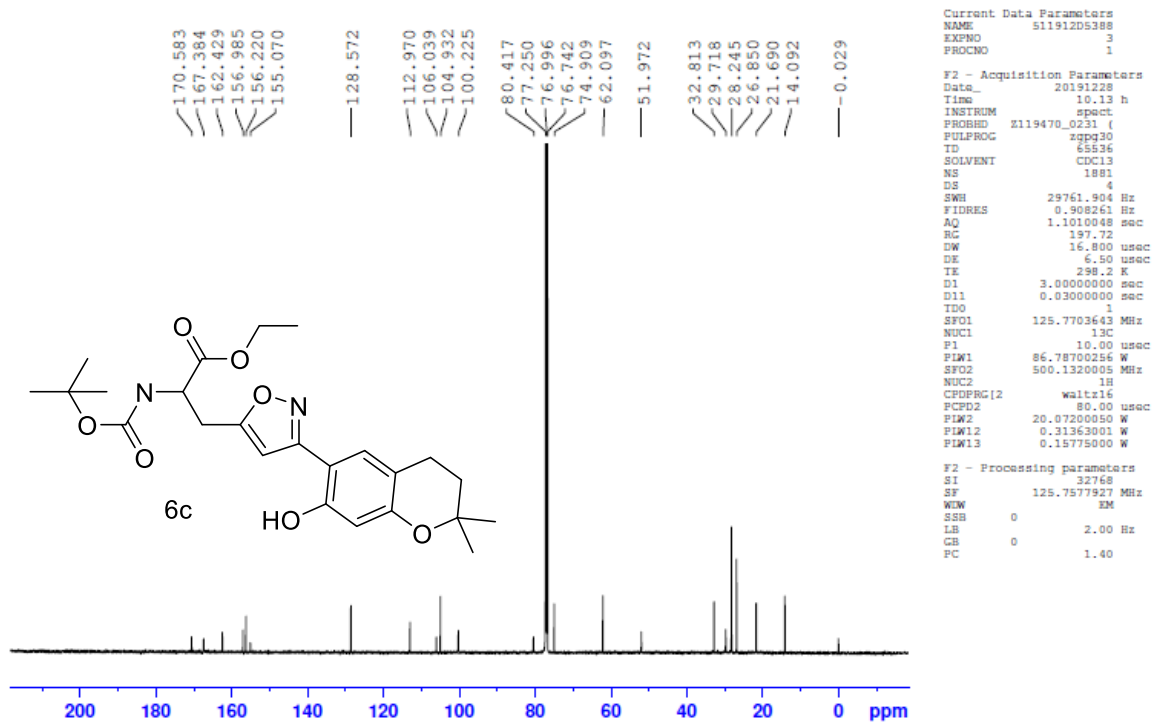

GVK-RAG-2-53

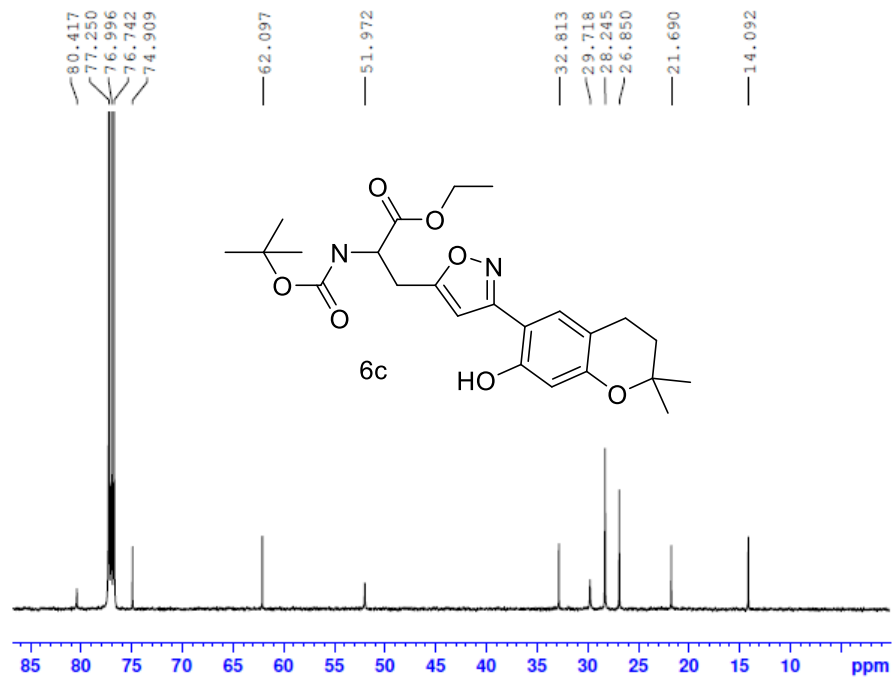

```

Current Data Parameters
NAME      511912D5388
EXPNO    3
PROCNO   1

F2 - Acquisition Parameters
Date_    20191228
Time     10.13 h
INSTRUM spect
PROBHD   Z119470_0231 (
PULPROG zgpg30
TD       65536
SOLVENT  CDCl3
NS       1881
DS       4
SWH      29761.904 Hz
FIDRES   0.908261 Hz
AQ       1.1010048 sec
RG       197.72
DW       16.800 usec
DE       6.50 usec
TE       298.2 K
D1       3.0000000 sec
D11      0.0300000 sec
TD0      1
SF01     125.7703643 MHz
NUC1     13C
P1       10.00 usec
PLW1     86.78700256 W
SF02     500.1320005 MHz
NUC2     1H
CPDPRG2 waltz16
PCPD2    80.00 usec
PLW2     20.07200050 W
PLW12    0.31363001 W
PLW13    0.15775000 W

F2 - Processing parameters
SI       32768
SF       125.7577927 MHz
WVW      EM
SSB      0
LB       2.00 Hz
GB       0
PC       1.40
    
```

GVK-RAG-2-53

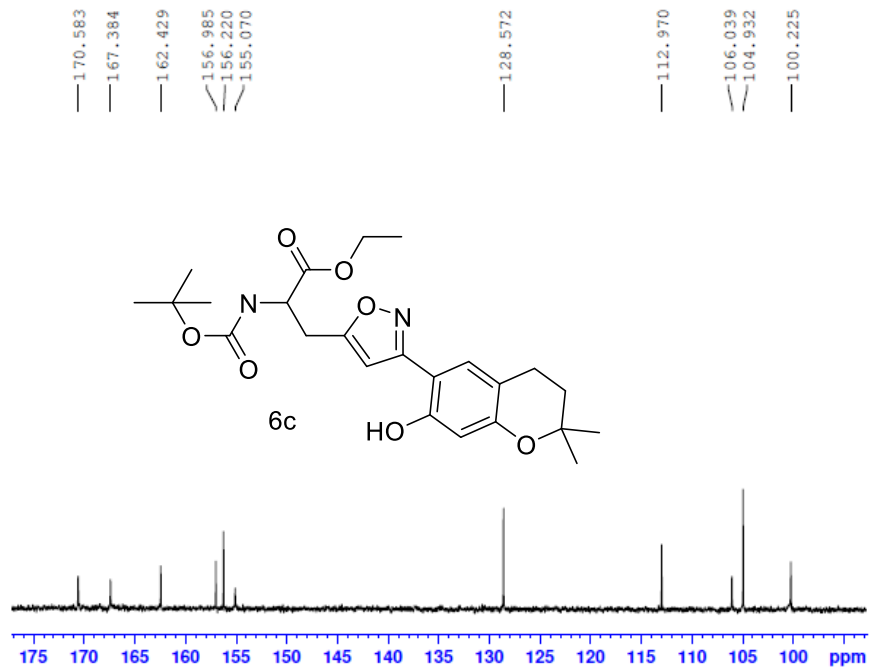

```

Current Data Parameters
NAME      511912D5388
EXPNO    3
PROCNO   1

F2 - Acquisition Parameters
Date_    20191228
Time     10.13 h
INSTRUM spect
PROBHD   Z119470_0231 (
PULPROG zgpg30
TD       65536
SOLVENT  CDCl3
NS       1881
DS       4
SWH      29761.904 Hz
FIDRES   0.908261 Hz
AQ       1.1010048 sec
RG       197.72
DW       16.800 usec
DE       6.50 usec
TE       298.2 K
D1       3.0000000 sec
D11      0.0300000 sec
TD0      1
SF01     125.7703643 MHz
NUC1     13C
P1       10.00 usec
PLW1     86.78700256 W
SF02     500.1320005 MHz
NUC2     1H
CPDPRG2 waltz16
PCPD2    80.00 usec
PLW2     20.07200050 W
PLW12    0.31363001 W
PLW13    0.15775000 W

F2 - Processing parameters
SI       32768
SF       125.7577927 MHz
WVW      EM
SSB      0
LB       2.00 Hz
GB       0
PC       1.40
    
```



GVK BIOScience Private Limited  
Discovery Chemistry- Analytical Services

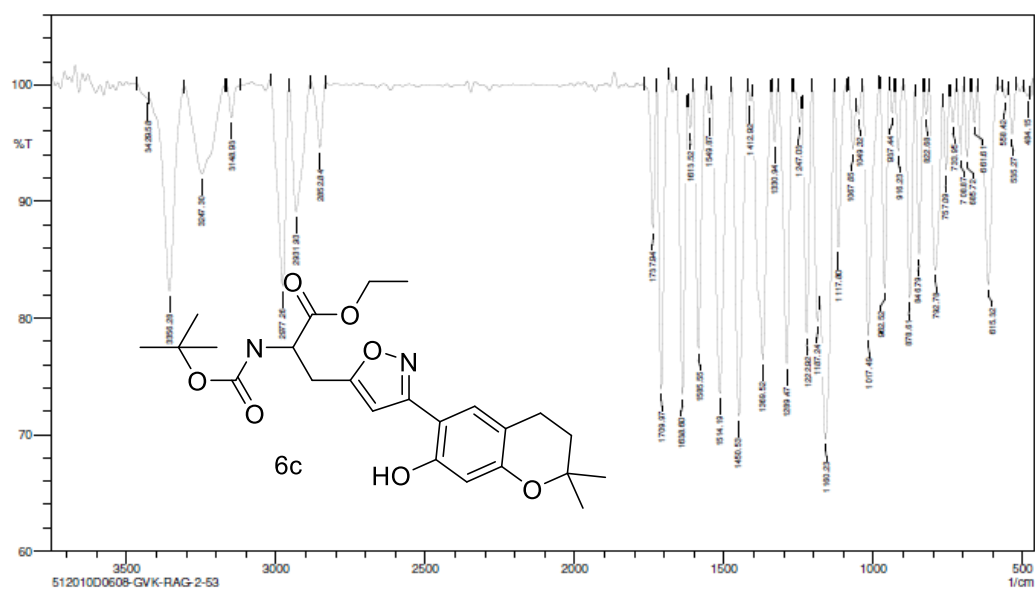

Sample Name:  
512010D0608-GVK-RAG-2-53

No. of Scans:

Date/Time: 10/31/2020 12:29:26 PM

User: GVKBIO

GVK-RAG-2-53

Discovery Chemistry - Analytical Services  
LCMS - REPORT

27-Dec-2019

19:10:19

AQ METHOD:FA 4MIN

ANL-MCL5-LCMS-007

511912D5387A

4: Diode Array

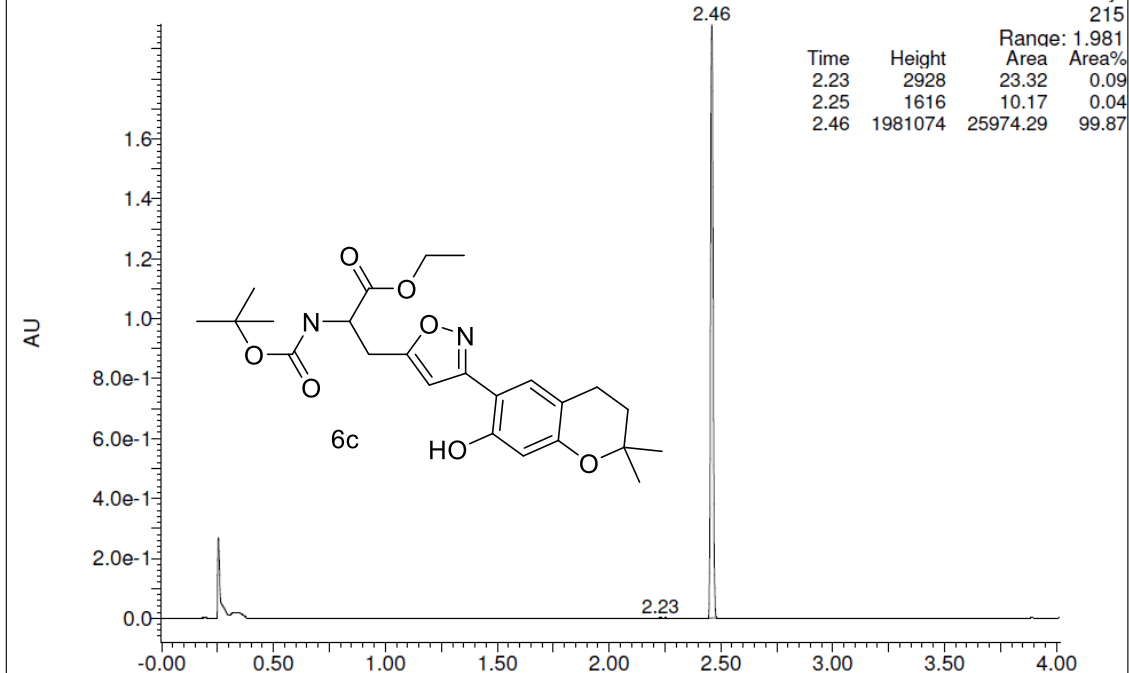

511912D5387A

1: Scan ES+  
TIC  
2.21e8

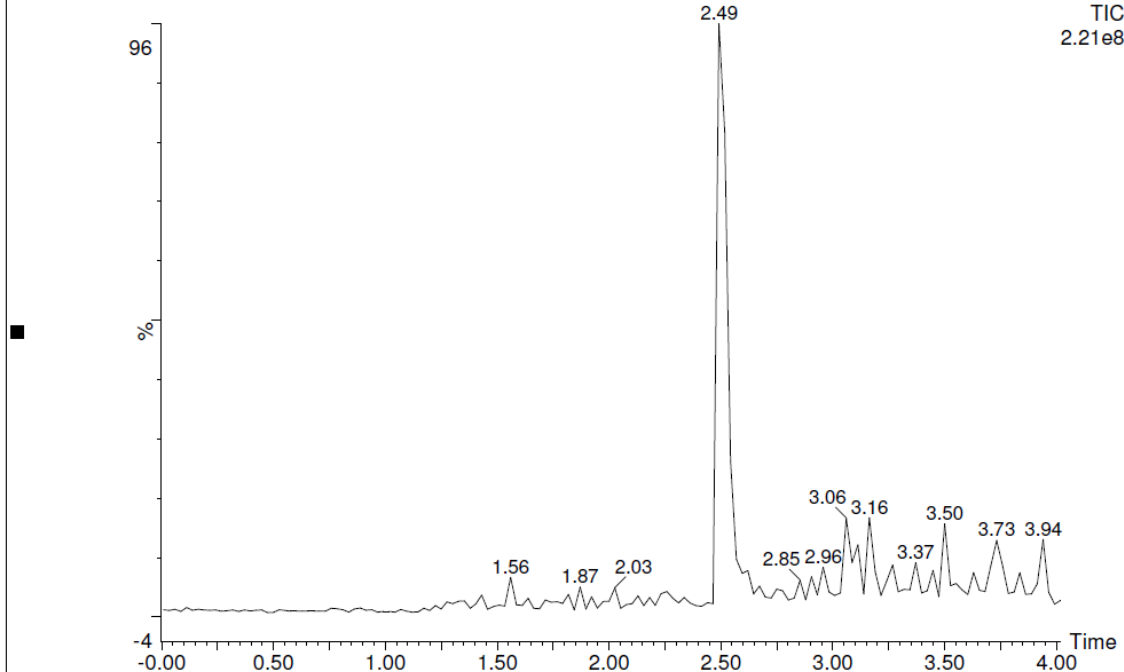

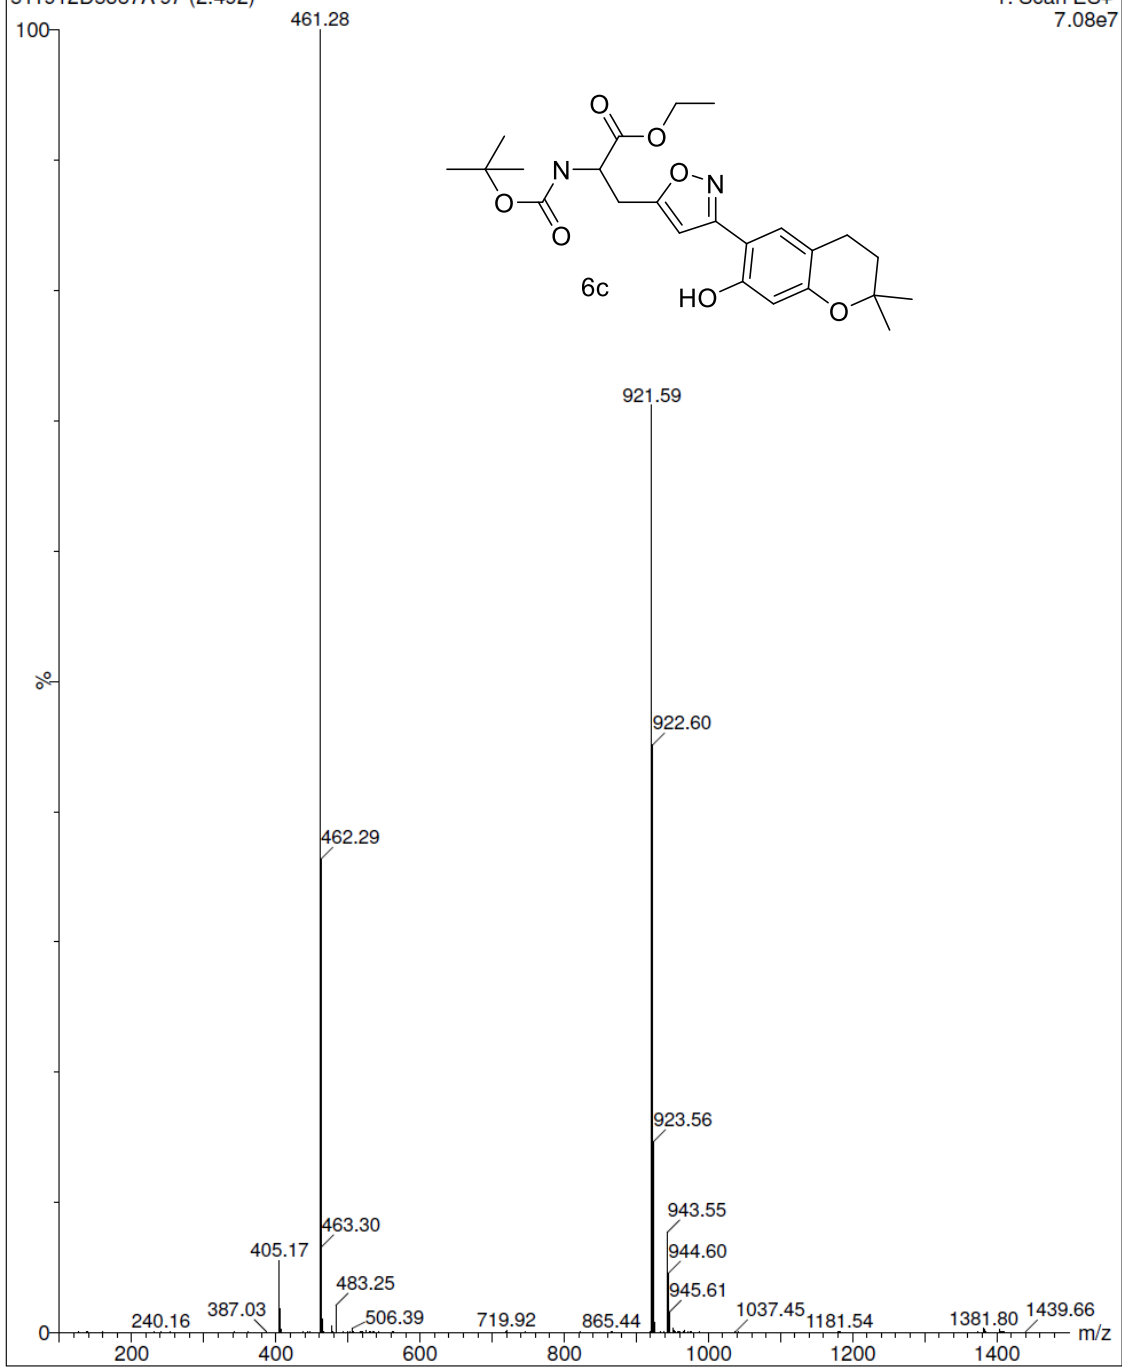

GVX-RAG-1-80  
AR NO-NMR/18/11/0243

Reference Code: 511811A2544-GVX-RAG-1-80  
Solvent: cdcl3  
Archive directory:  
/home/gvxbio/data/2018/Nov  
Agilent 400-MEDD2  
Data collected on: Nov 2 2018  
Experiment: PROTON

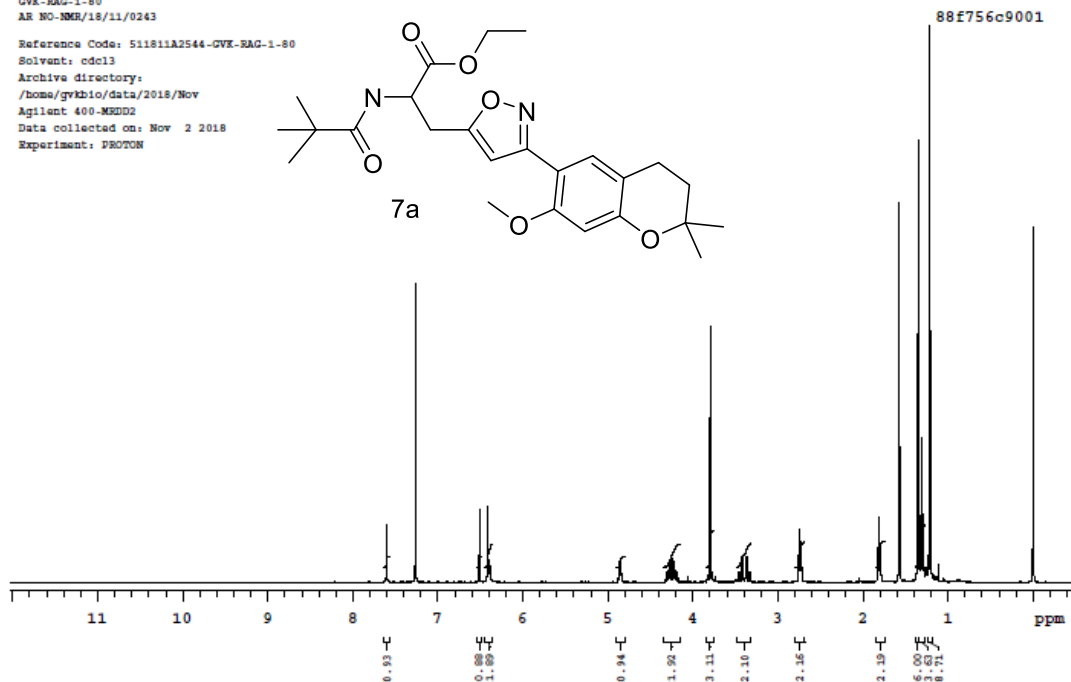

Plotname: 511811A2544-GVX-RAG-1-80\_PROTON\_01.REC\_plot01

GVX-RAG-1-80  
AR NO-NMR/18/11/0243

Reference Code: 511811A2544-GVX-RAG-1-80  
Solvent: cdcl3  
Archive directory:  
/home/gvxbio/data/2018/Nov  
Agilent 400-MEDD2  
Data collected on: Nov 2 2018  
Experiment: PROTON

88f756c9001

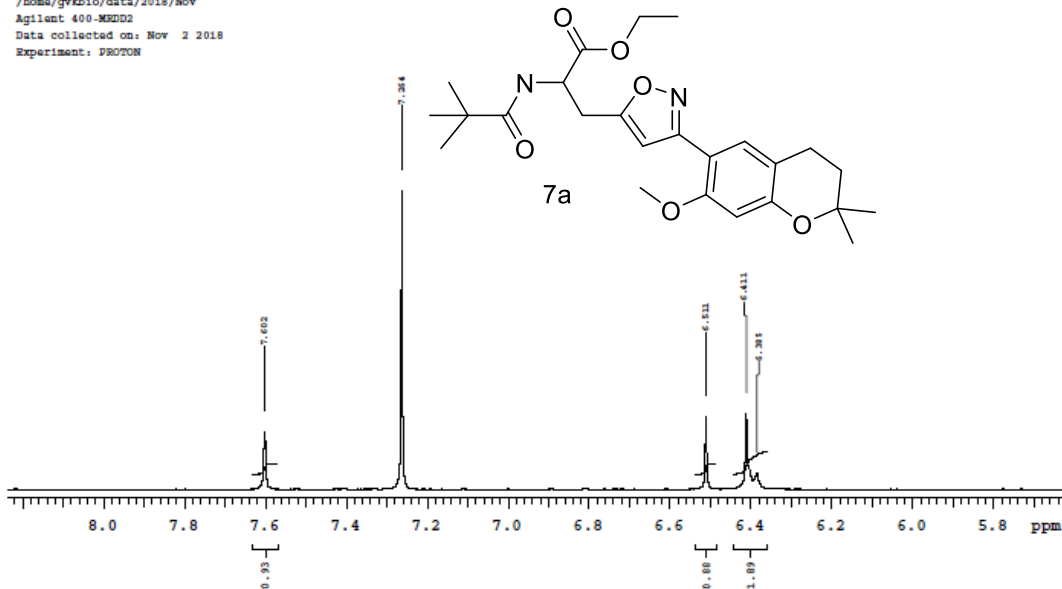

Plotname: 511811A2544-GVX-RAG-1-80\_PROTON\_01.REC\_plot02

GVK-RAG-1-80

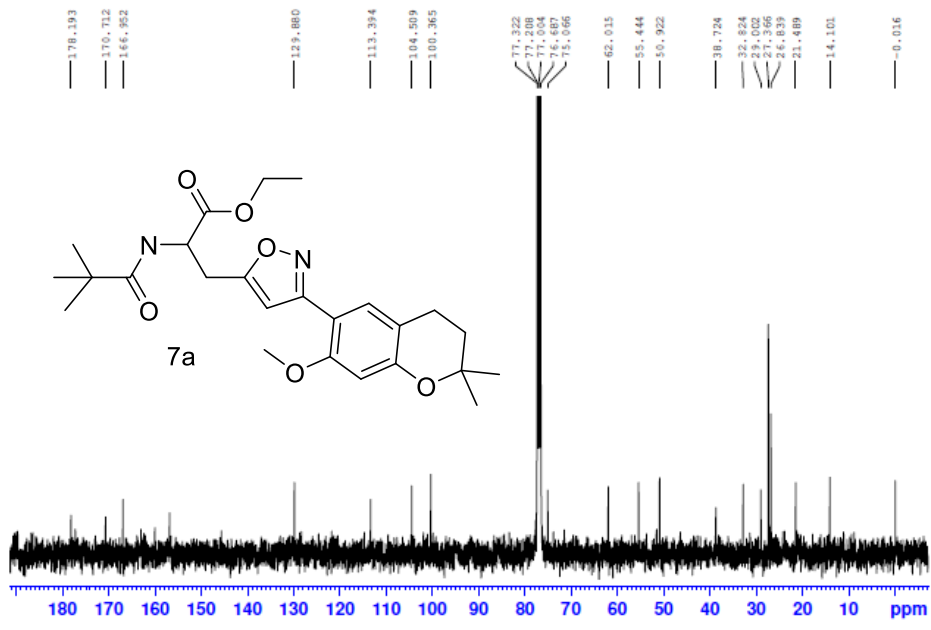

```

Current Data Parameters
NAME 3121000020-DVS-RAG-1-80
EXPNO 2
PROCNO 1
F2 - Acquisition Parameters
Date_ 2021101
Time 6.10 h
INSTRUM spect
PROBHD 116098_017
PULPRG2 zgpg30
TD 65536
SOLVENT CDCl3
NS 4
DS 4
SWH 24028.461 Hz
FIDRES 0.733596 Hz
AQ 1.3631488 sec
RG 159.29
SQ 20.100 usec
SE 6.50 usec
TE 300.2 K
SI 3.0000000 sec
S11 0.0300000 sec
TDD 1
SFO1 100.6228298 MHz
NUC1 13C
P1 10.00 usec
F1 70.6080071 W
SFO2 400.1316005 MHz
NUC2 1H
CPDPRG2 waltz16
PCPD2 30.00 usec
P2 16.8290047 W
F2 0.20776001 W
SFO3 0.1040000 W
F2 - Processing parameters
SI 32768
SF 100.6127485 MHz
WDW EM
SSB 0
LB 2.00 Hz
GB 0
PC 1.40
    
```

ANL-MCL5-NMR-001

GVK-RAG-1-80

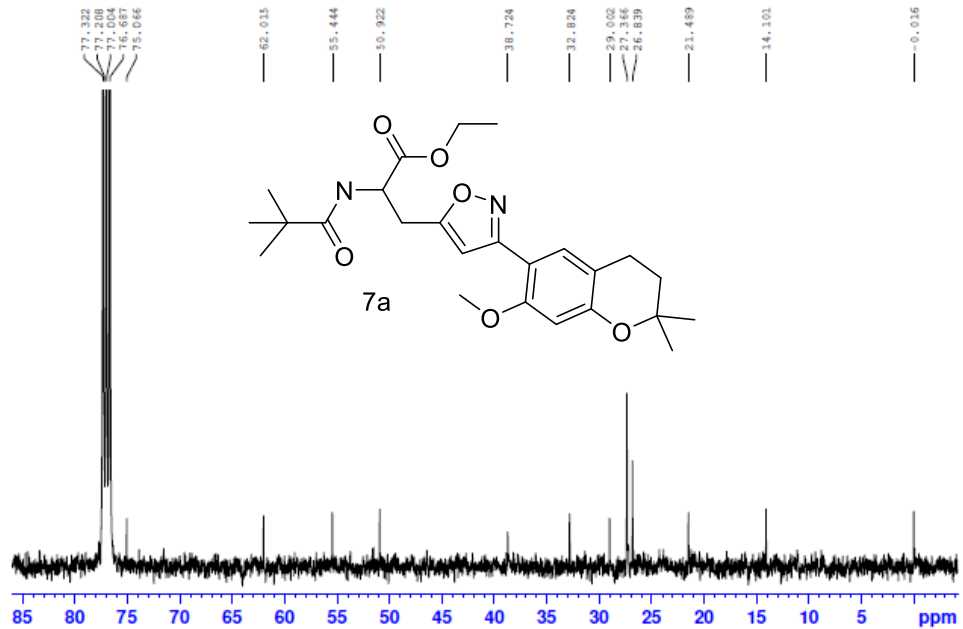

```

Current Data Parameters
NAME 3121000020-DVS-RAG-1-80
EXPNO 2
PROCNO 1
F2 - Acquisition Parameters
Date_ 2021101
Time 6.10 h
INSTRUM spect
PROBHD 116098_017
PULPRG2 zgpg30
TD 65536
SOLVENT CDCl3
NS 4
DS 4
SWH 24028.461 Hz
FIDRES 0.733596 Hz
AQ 1.3631488 sec
RG 159.29
SQ 20.100 usec
SE 6.50 usec
TE 300.2 K
SI 3.0000000 sec
S11 0.0300000 sec
TDD 1
SFO1 100.6228298 MHz
NUC1 13C
P1 10.00 usec
F1 70.6080071 W
SFO2 400.1316005 MHz
NUC2 1H
CPDPRG2 waltz16
PCPD2 30.00 usec
P2 16.8290047 W
F2 0.20776001 W
SFO3 0.1040000 W
F2 - Processing parameters
SI 32768
SF 100.6127485 MHz
WDW EM
SSB 0
LB 2.00 Hz
GB 0
PC 1.40
    
```

ANL-MCL5-NMR-001

GVK BIOScience Private Limited  
Discovery Chemistry- Analytical Services

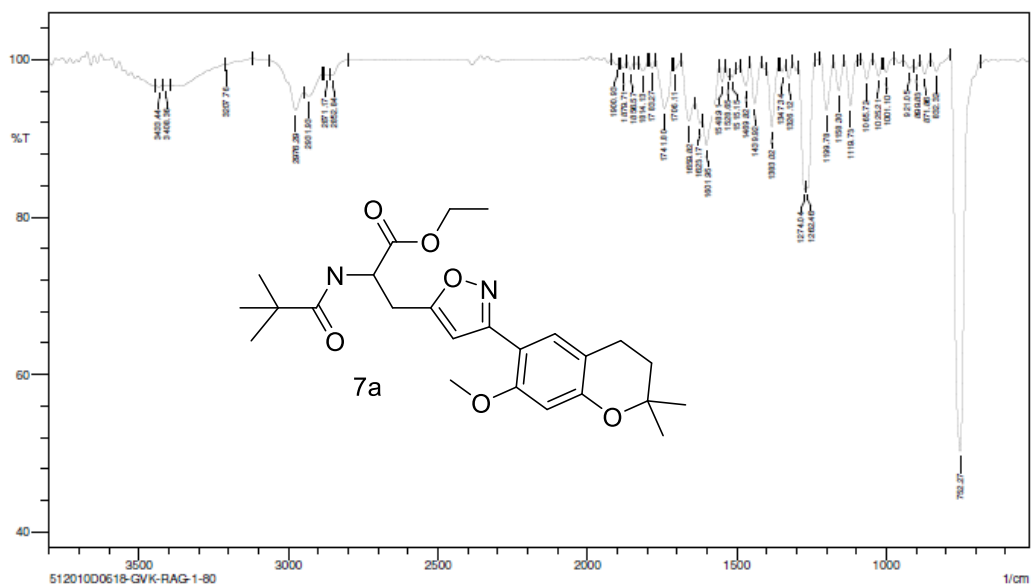

Sample Name:  
512010D0618-GVK-RAG-1-80

No. of Scans:

Date/Time: 10/31/2020 2:23:43 PM

User: GVKBIO

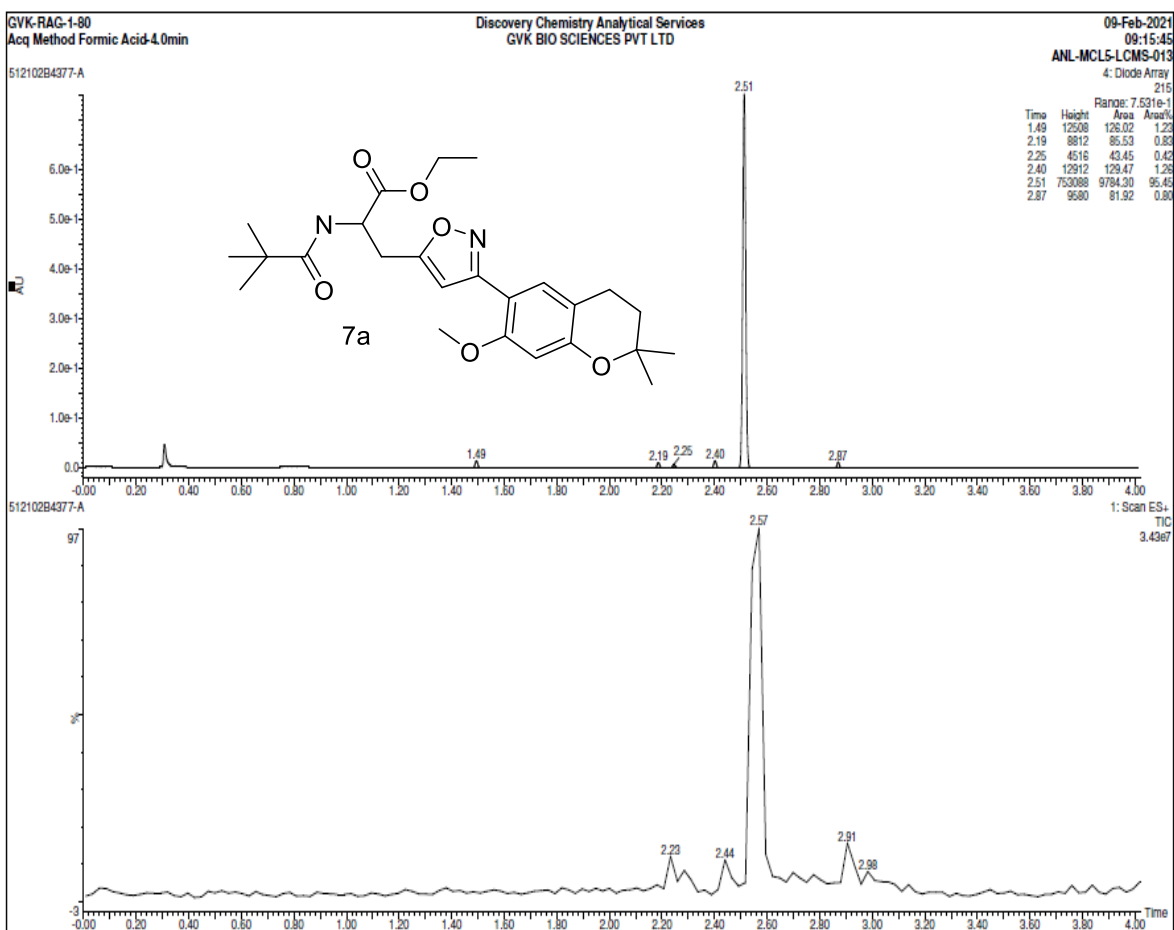

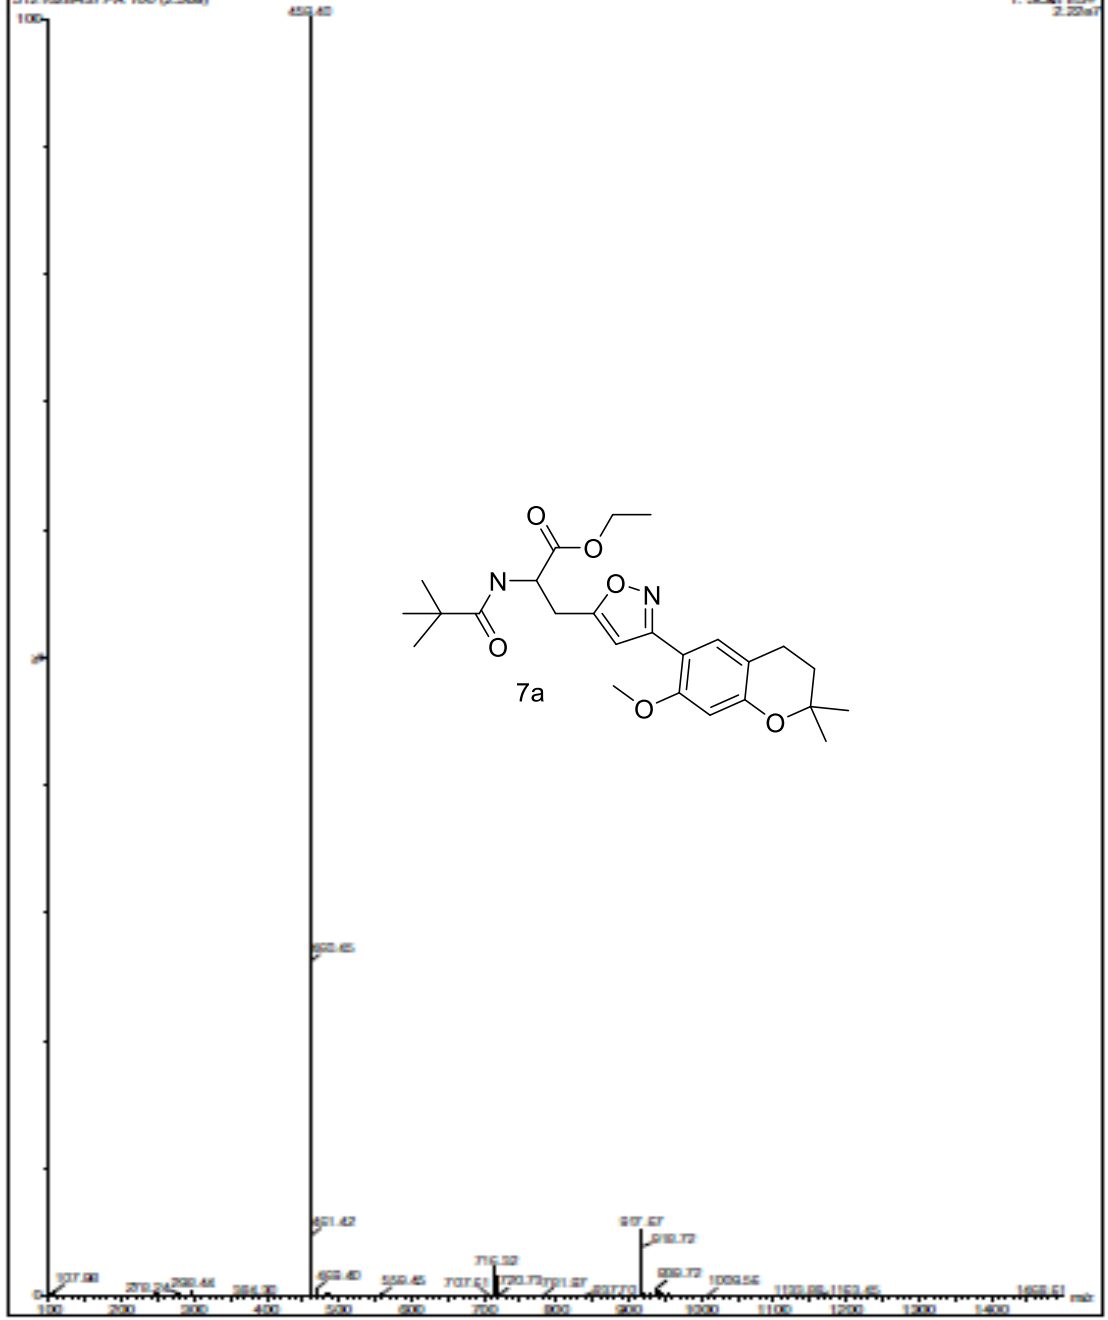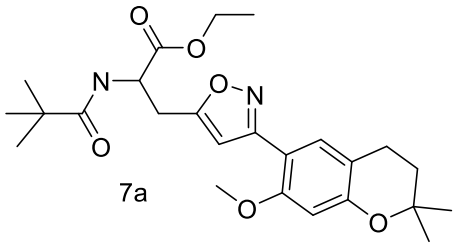

GVK-RAG-1-50

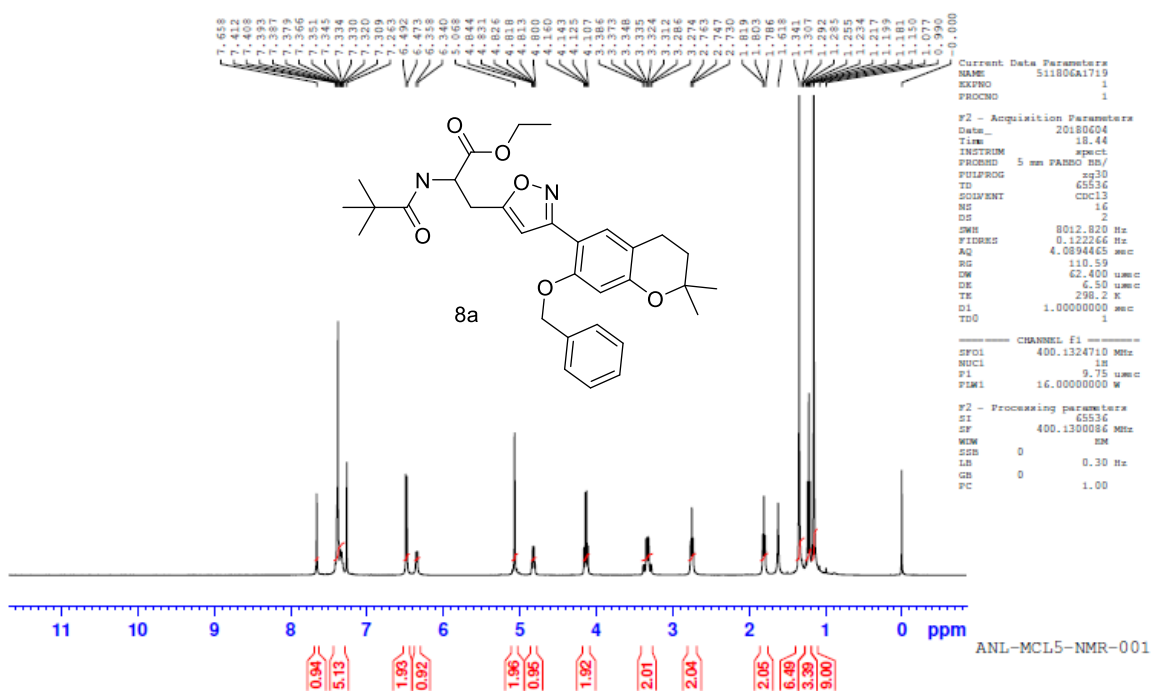

GVK-RAG-1-50

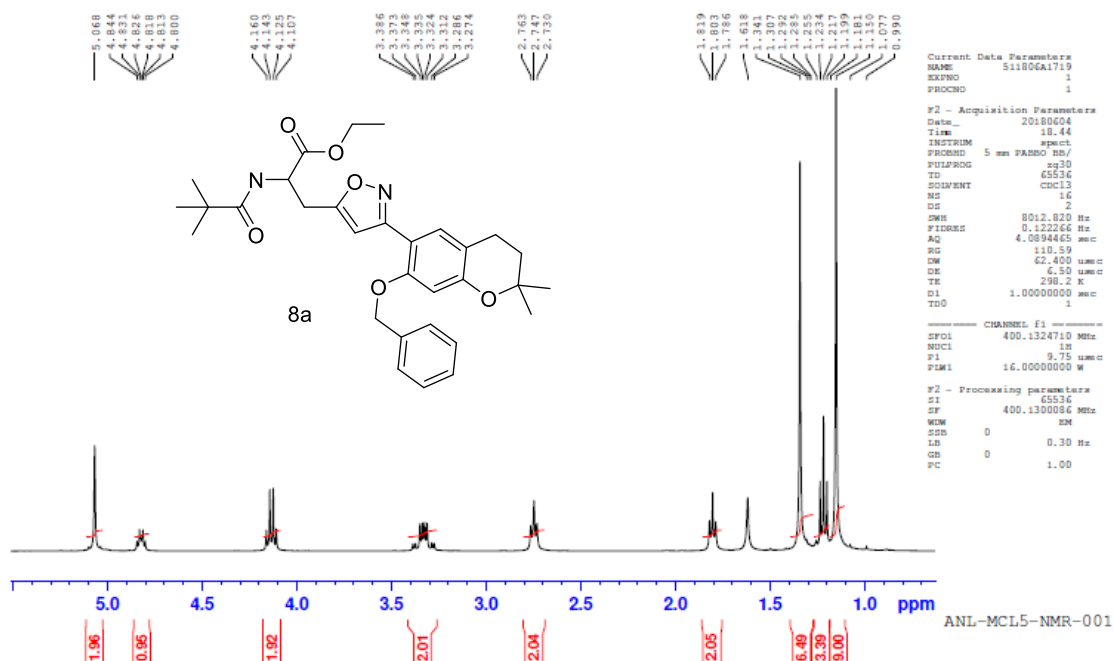



GVK-RAG-1-50

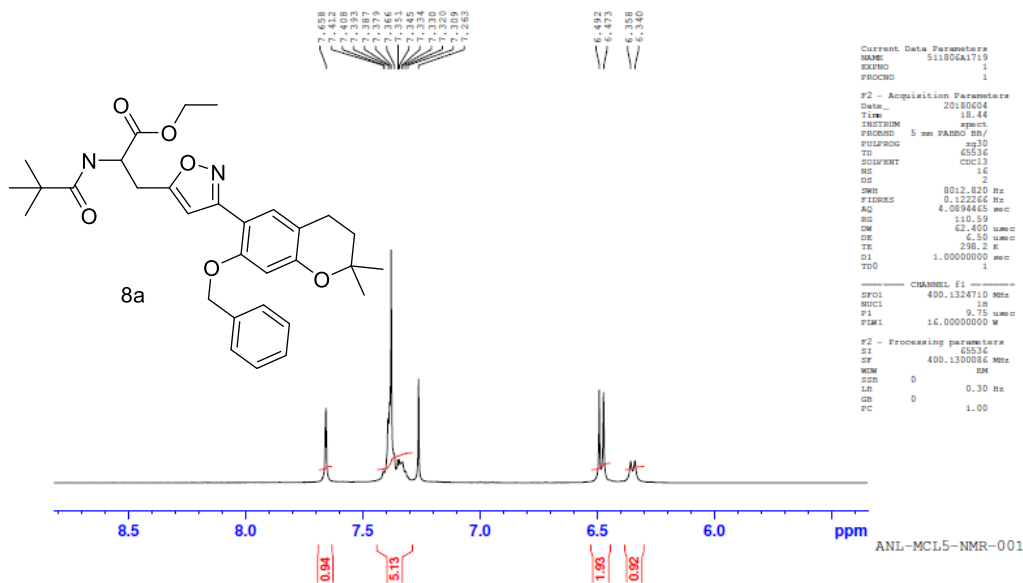

GVK-RAG-1-50

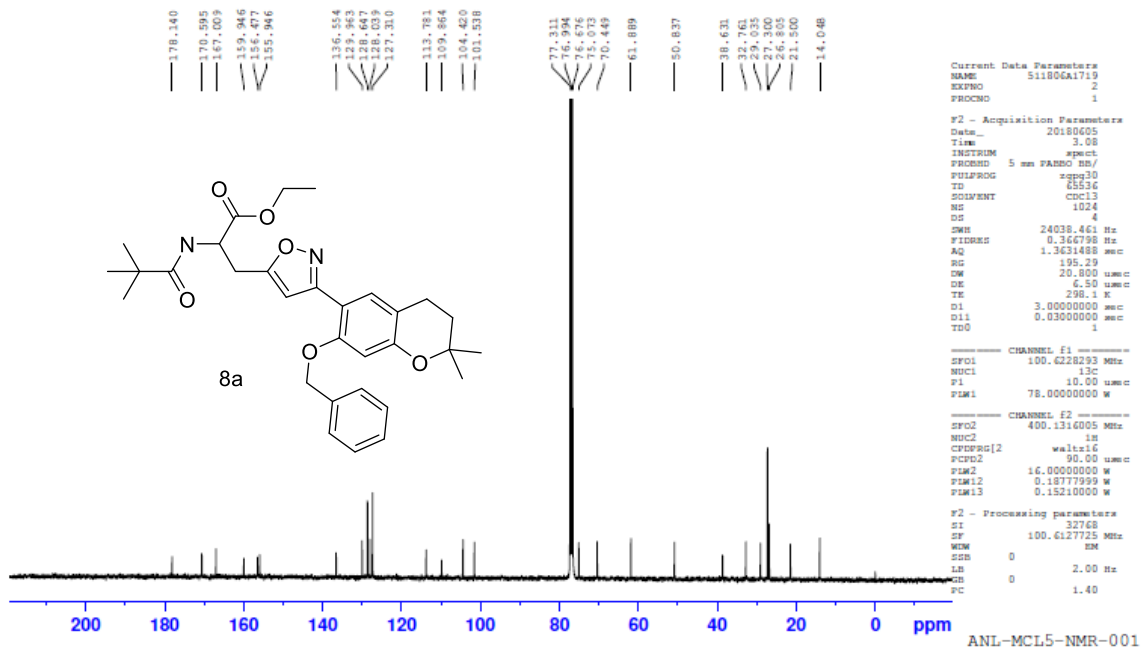

GVK-RAG-1-50

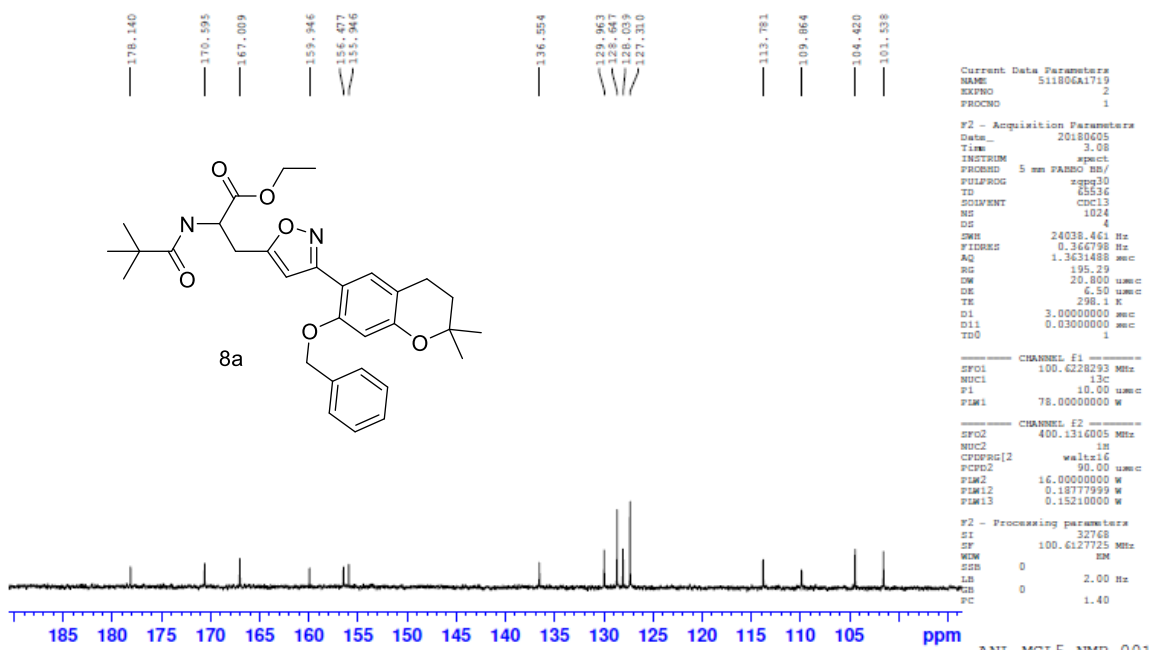

GVK-RAG-1-50

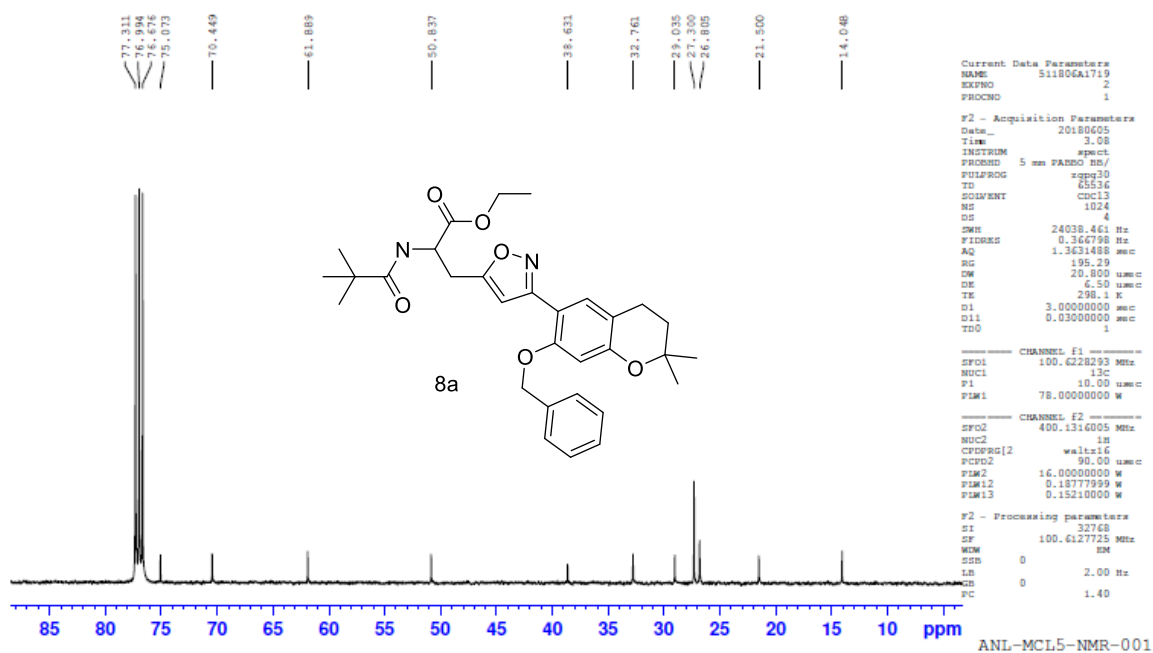

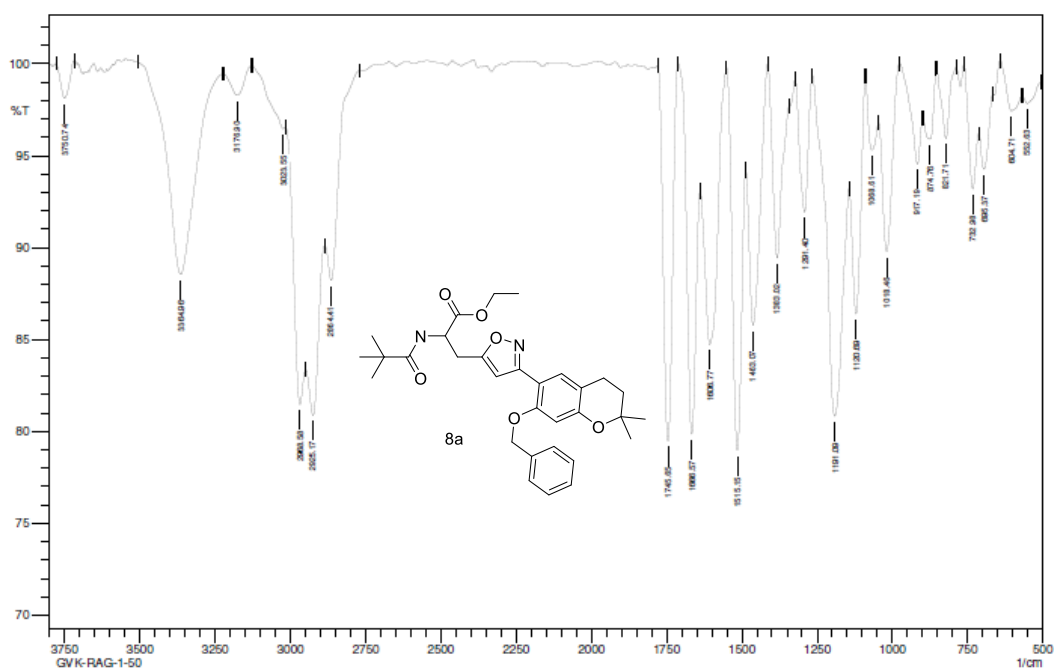

Comment: IN Kbr  
GVK-RAG-1-50

No. of Scans:  
Resolution:  
Apodization:

Date: 6/4/2018 4:08:01 PM  
User: Admin

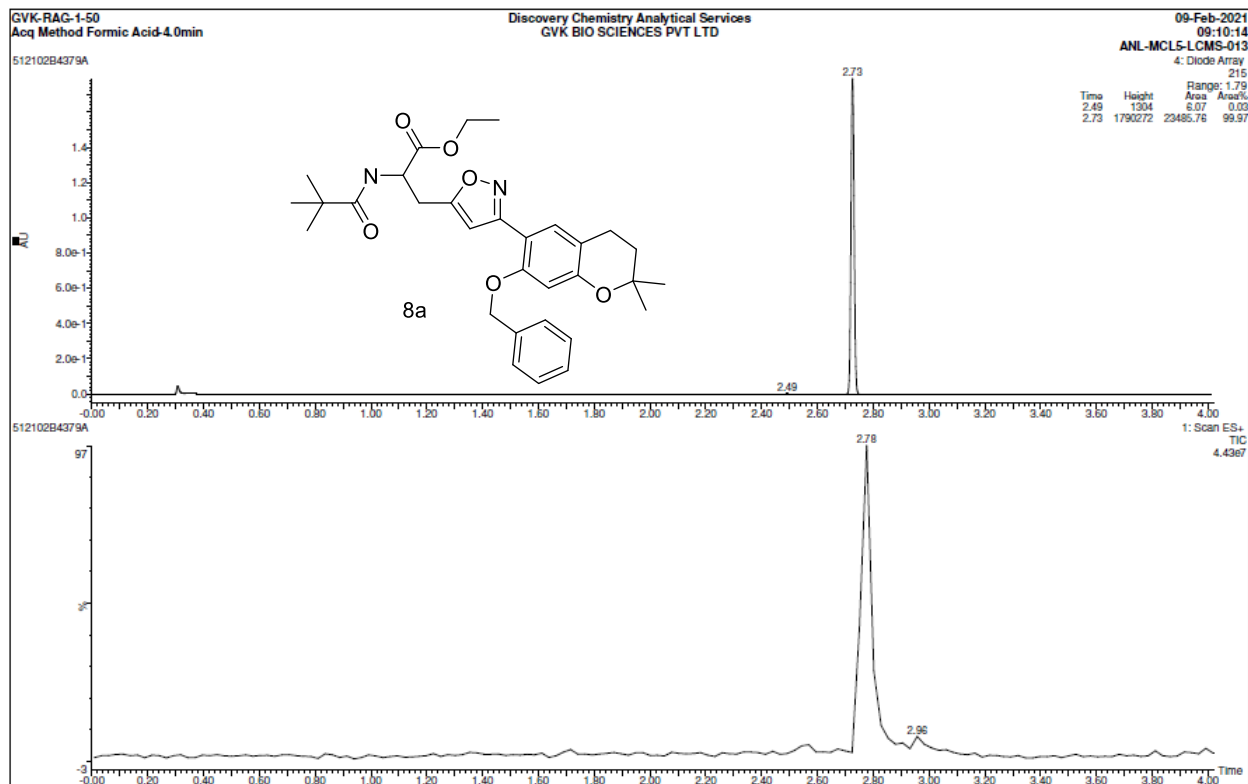





GVK-RAG-1-55p  
AR NO-NMR/18/08/0071

Reference Code: 511808A0875-GVK-RAG-1-55p  
Solvent: cdcl3  
Archive directory:  
/home/gvkbio/data/2018/Aug  
Agilent 400-MKDD2  
Data collected on: Aug 1 2018  
Experiment: PROTON

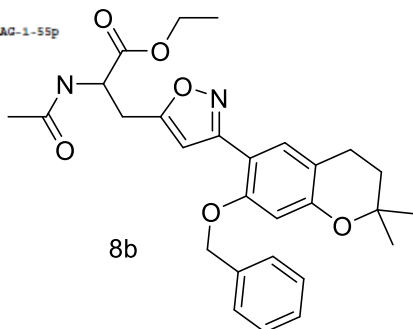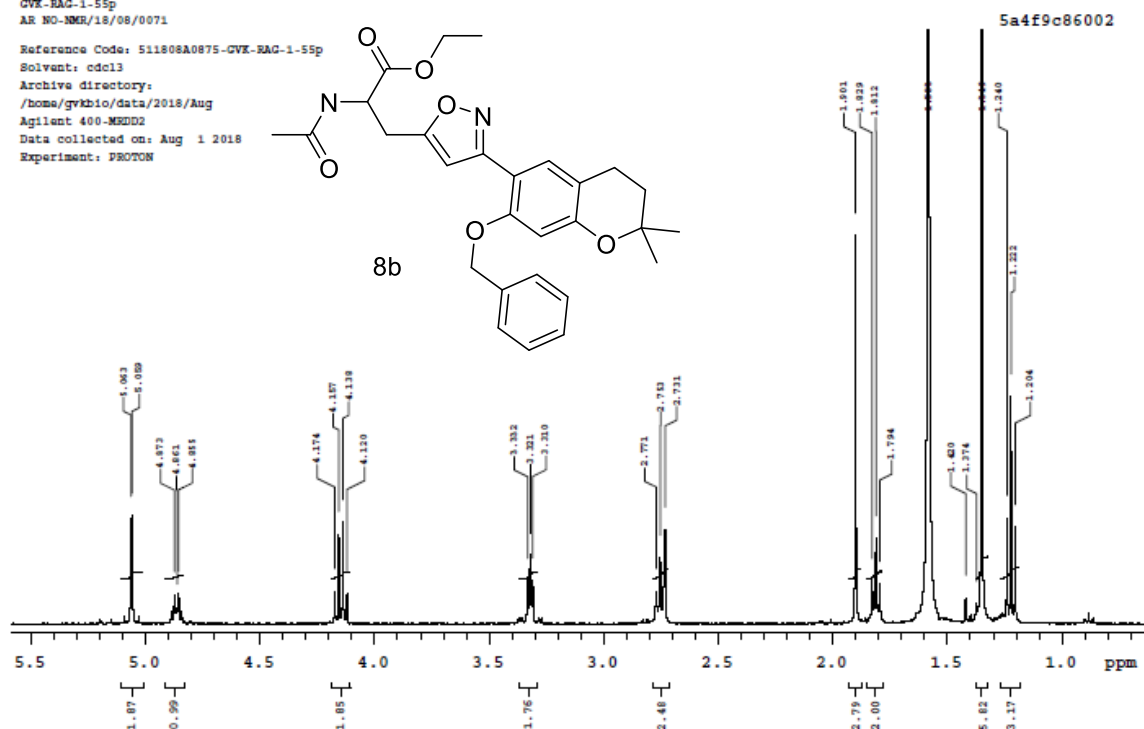

Plotname: 511808A0875-GVK-RAG-1-55p\_PROTON\_01.REC\_plot03

GVK-RAG-1-55  
AR NO-NMR/18/08/0134

Reference Code: 511808A1090-GVK-RAG-1-55  
Solvent: cdcl3  
Archive directory:  
/home/gvkbio/data/2018/Aug  
Agilent 400-MKDD2  
Data collected on: Aug 2 2018  
Experiment: CARBON

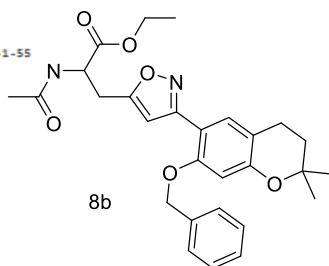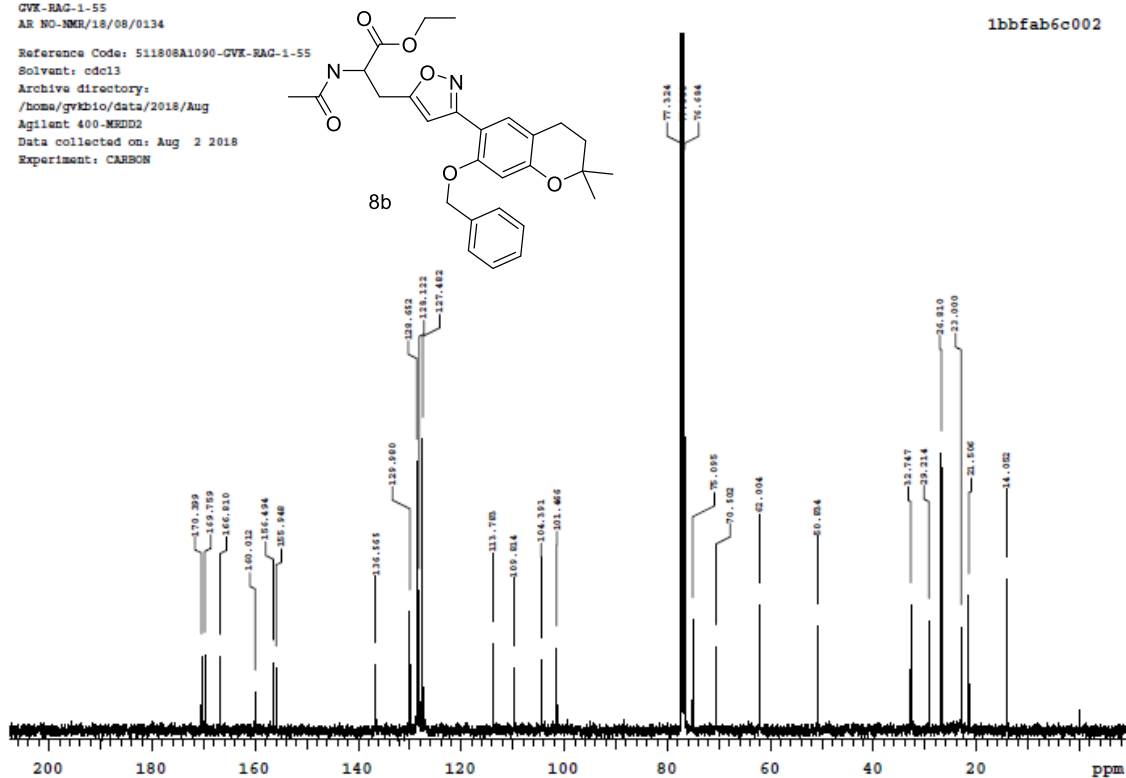

Plotname: 511808A1090-GVK-RAG-1-55\_CARBON\_01.REC\_plot01

GVK-RAG-1-55  
AR NO-NMR/18/08/0134

1bbfab6c002

Reference Code: 511808A1090-GVK-RAG-1-55  
Solvent: cdcl3  
Archive directory:  
/home/gvkbio/data/2018/Aug  
Agilent 400-MREDD2  
Data collected on: Aug 2 2020  
Experiment: CARBON

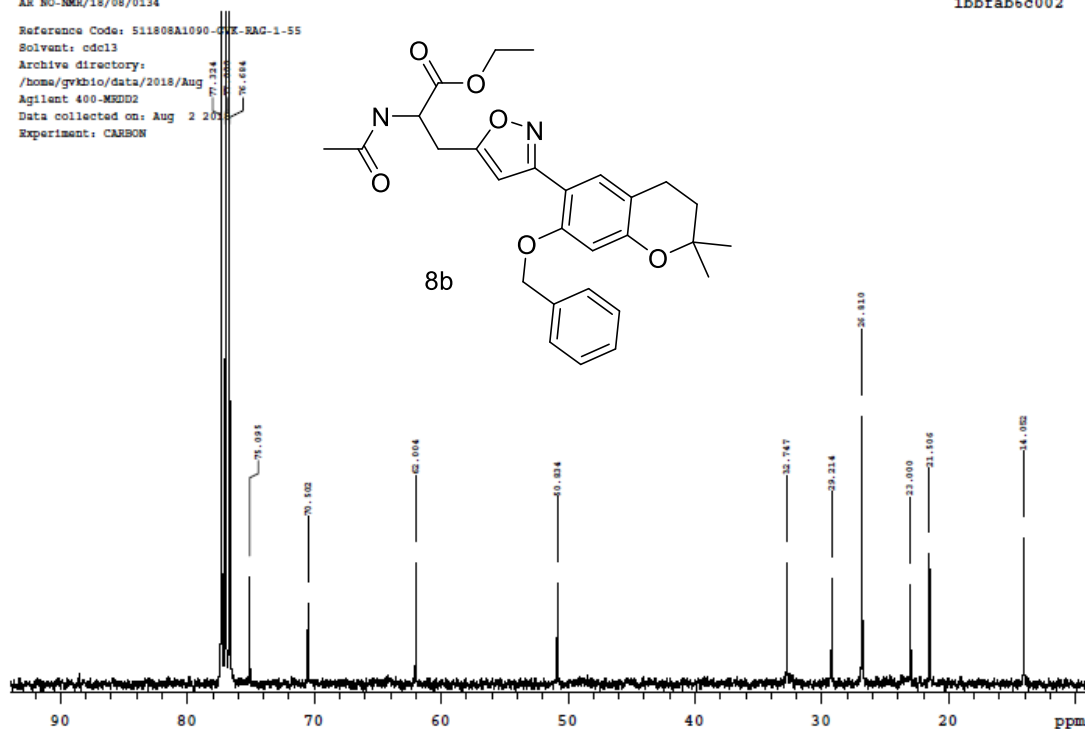

Plotname: 511808A1090-GVK-RAG-1-55\_CARBON\_01.REC\_plot03

SHIMADZU

GVK BIOScience Private Limited  
Discovery Chemistry- Analytical Services

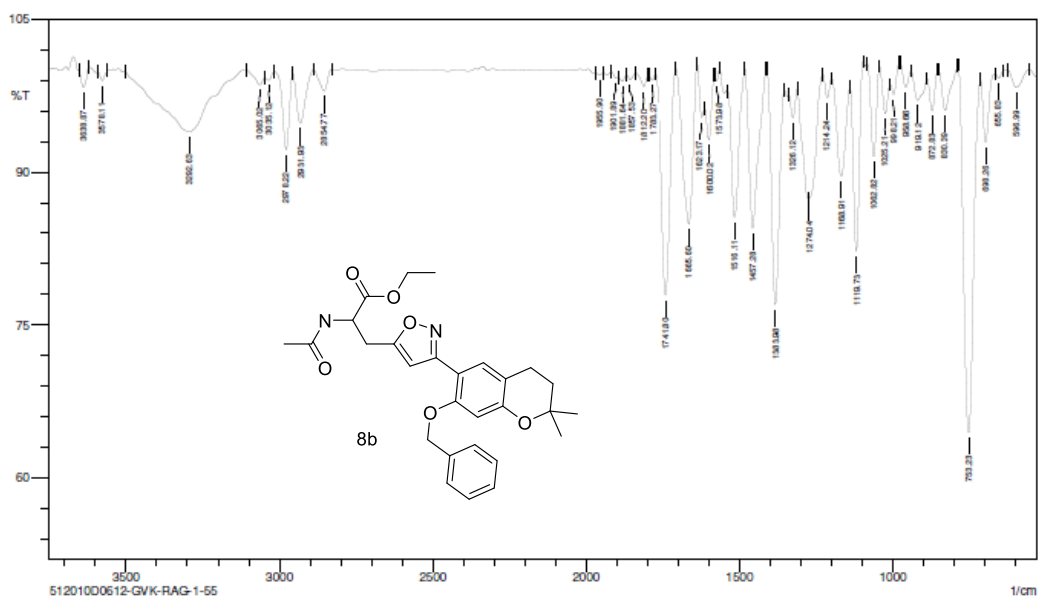

Sample Name:  
512010D0612-GVK-RAG-1-55

No. of Scans:

Date/Time: 10/31/2020 2:33:43 PM

User: GVKBIO

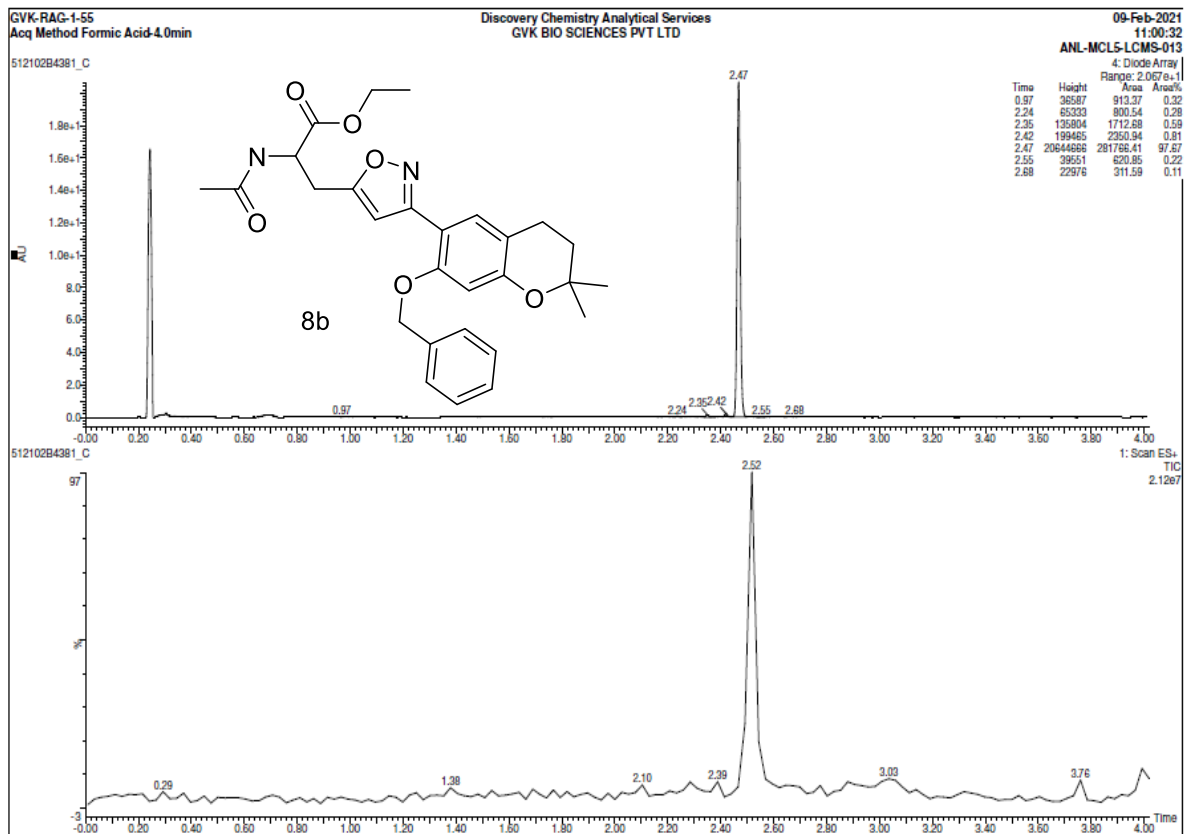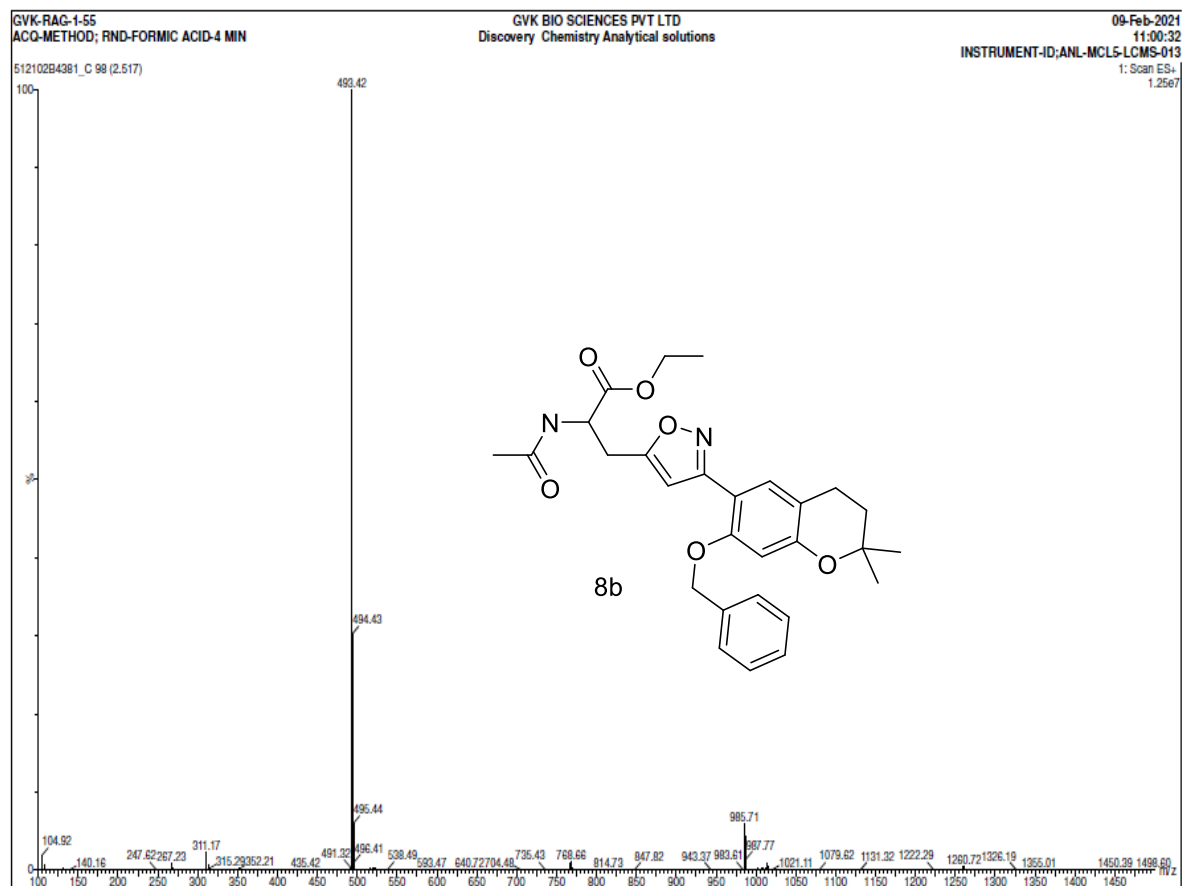



GVX-RAG-1-57  
AR NO-MMR/18/08/0376  
Reference Code: S11808A3467-GVX-RAG-1-57  
Solvent: cdcl3  
Archive directory:  
/home/gvxbio/data/2018/Aug  
Agilent 400-MRDD2  
Data collected on: Aug 3 2018  
Experiment: PROTON

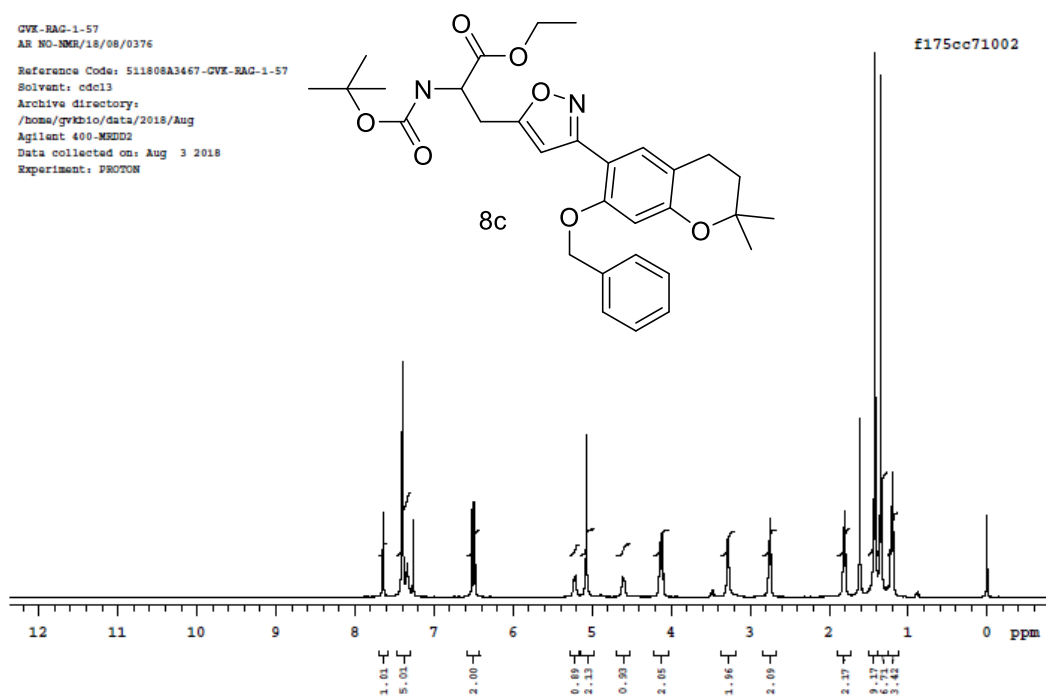

Plotname: S11808A3467-GVX-RAG-1-57\_PROTON\_01.REC\_plot01

GVK-RAG-1-57  
AR NO-NMR/18/08/0376  
Reference Code: 511808A3467-GVK-RAG-1-57  
Solvent: cdcl3  
Archive directory:  
/home/gvkbio/data/2018/Aug  
Agilent 400-MRDD2  
Data collected on: Aug 3 2018  
Experiment: PROTON

f175cc71002

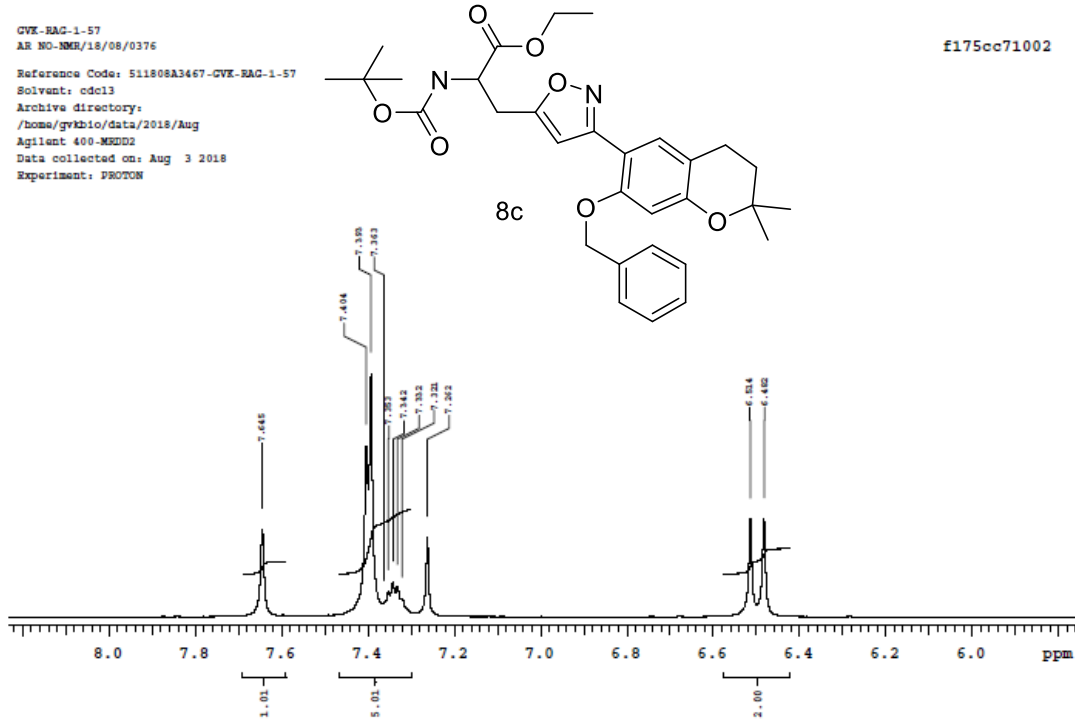

Plotname: 511808A3467-GVK-RAG-1-57\_PROTON\_01.RRC\_plot02

GVK-RAG-1-57  
AR NO-NMR/18/08/0376  
Reference Code: 511808A3467-GVK-RAG-1-57  
Solvent: cdcl3  
Archive directory:  
/home/gvkbio/data/2018/Aug  
Agilent 400-MRDD2  
Data collected on: Aug 3 2018  
Experiment: PROTON

f175cc71002

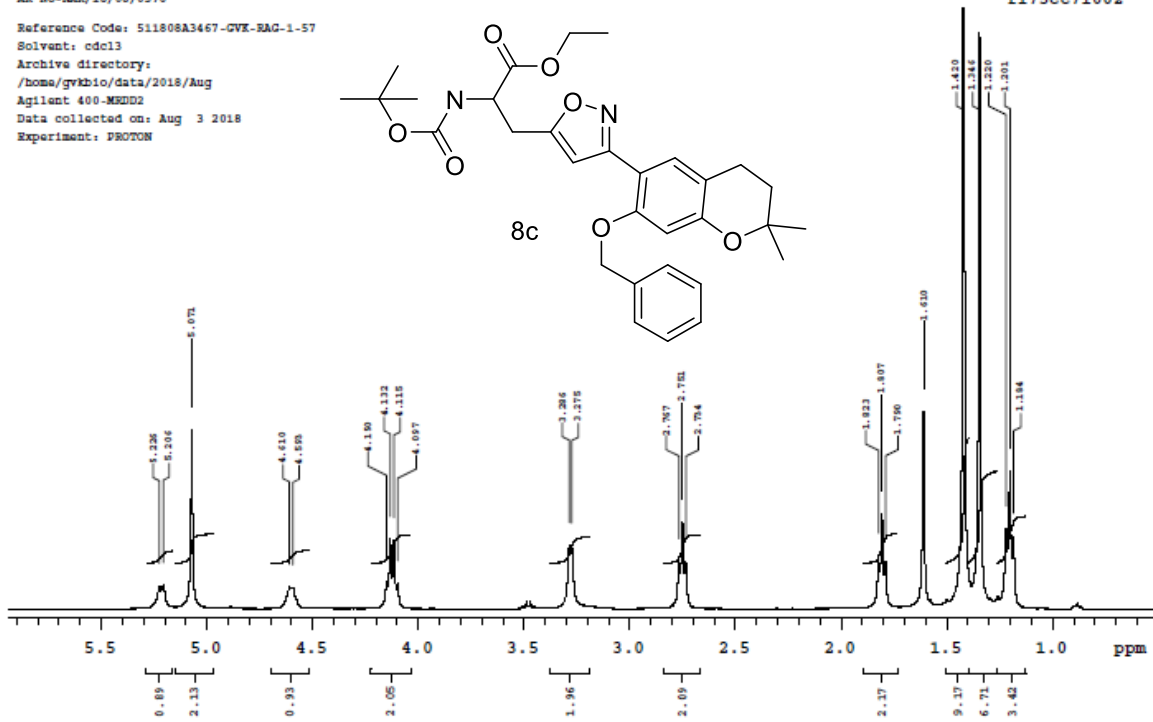

Plotname: 511808A3467-GVK-RAG-1-57\_PROTON\_01.RRC\_plot03

GVK-RAG-1-57  
AR NO-NMR/18/08/0376

fa8a8e2f001

Reference Code: 511808A3467-GVK-RAG-1-57  
Solvent: cdcl3  
Archive directory:  
/home/gvkbio/data/2018/Aug  
Agilent 400-MEDD2  
Data collected on: Aug 4 2018  
Experiment: CARBON

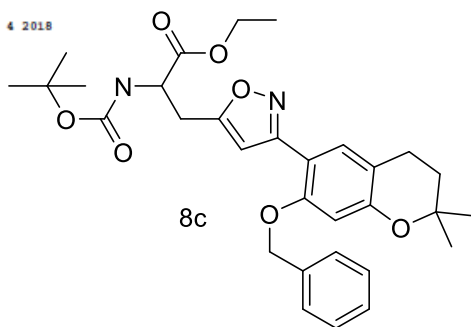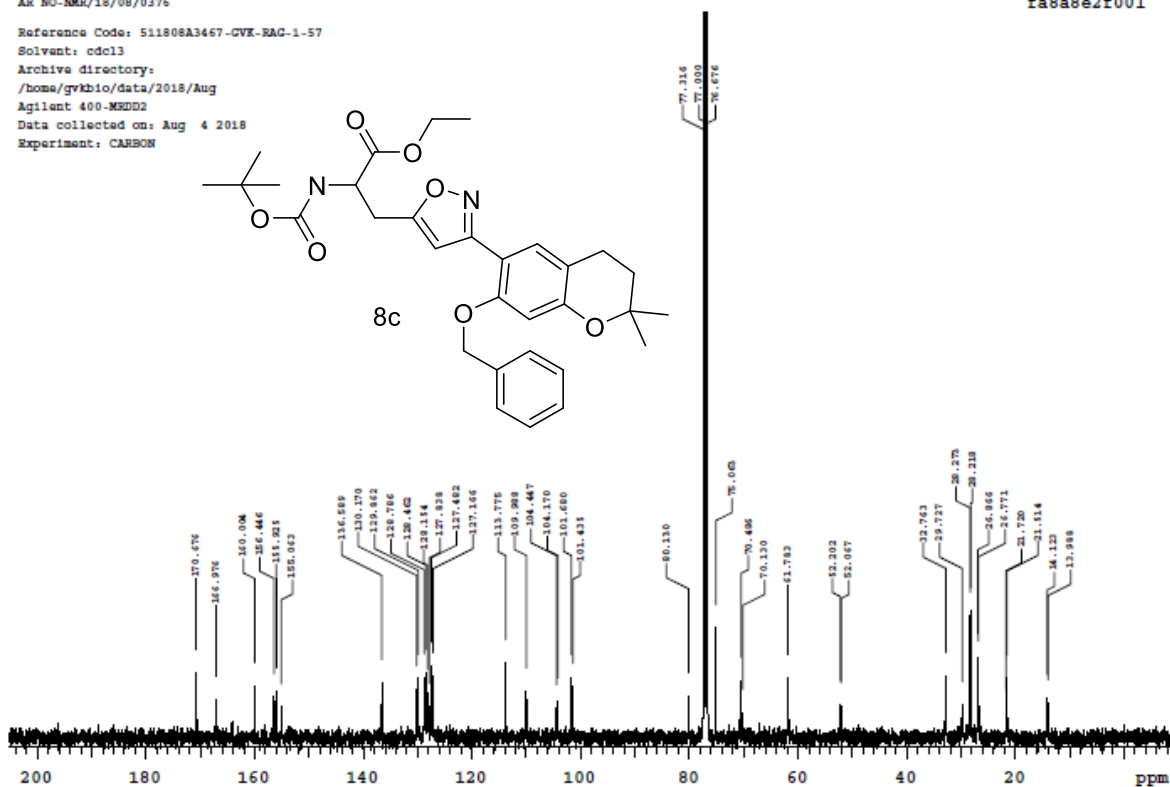

Plotname: 511808A3467-GVK-RAG-1-57 CARBON\_01.REC\_plot01

GVK BIOScience Private Limited  
Discovery Chemistry- Analytical Services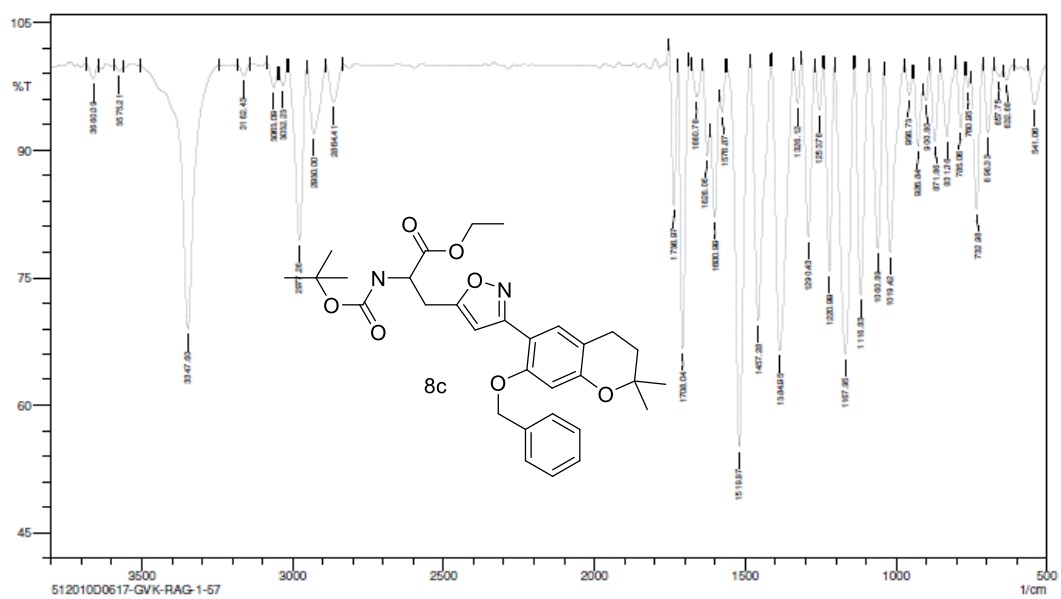Sample Name:  
512010D0617-GVK-RAG-1-57

No. of Scans:

Date/Time: 10/31/2020 12:52:12 PM

User: GVKBIO

GVK BIOSCIENCES PVT. LTD.  
MEDICINAL CHEMISTRY LABORATORY - ANALYTICAL RESEARCH  
LCMS REPORT

Sample Name : GVK-RAG-1-57 Vial position : P1-D-06  
Date of Analysis : 8/3/2018 5:23:44 PM Injection Vol : 1.000µl  
Acq. Method : RND-FA-4.01 Instrument ID : ANL-MCL5-LCMS-001

RND-FA-4.01 MIN :-

Column : ACQUITY UPLC BEH C18 (50mmx2.1mm, 1.7µm)  
Mobile Phase : A1 - 0.1 % FA IN WATER ; B1: 0.1%FA IN ACN  
Gradient : Time (min) / %B1:0/3,0.3/3,2.3/98,3.5/98,4.0/3,4.01/3  
Flow Rate : 0.6 ml/min  
Column Temp : 50°C

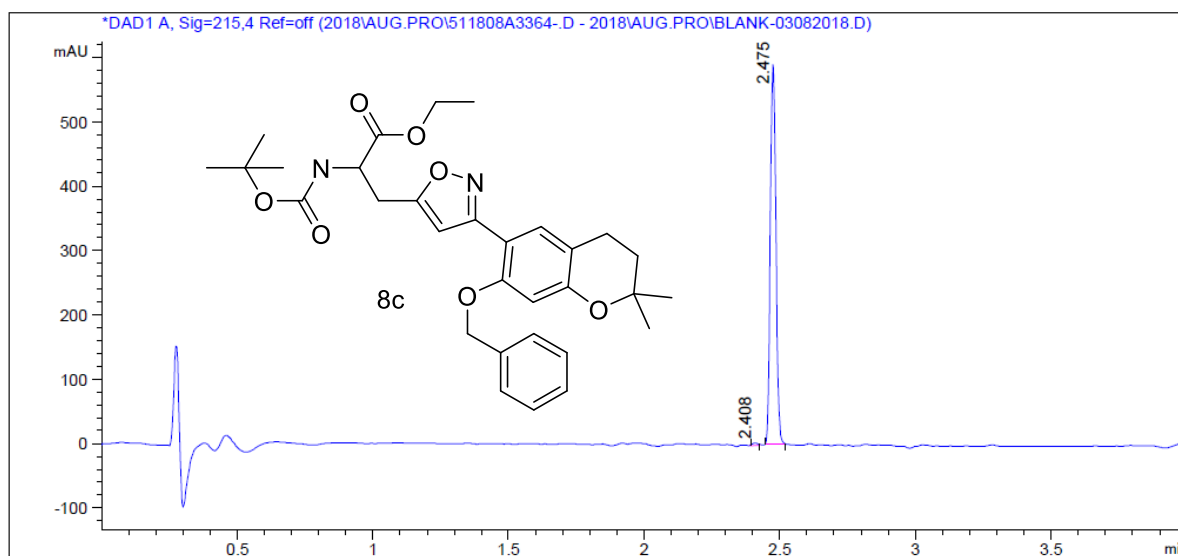

| Pea No | RT min | Area    | Area % |
|--------|--------|---------|--------|
| 1      | 2.41   | 4.887   | 0.565  |
| 2      | 2.48   | 859.452 | 99.435 |

Analysed by :

Page 1 of 2

MS Spectrum

\*MSD1 SPC, time=2.491 of C:\CHEM32\1\DATA\2018\AUG.PRO\511808A3364-D MM-ES+APCI, Pos, Scan, Frag: 70, "+VE"

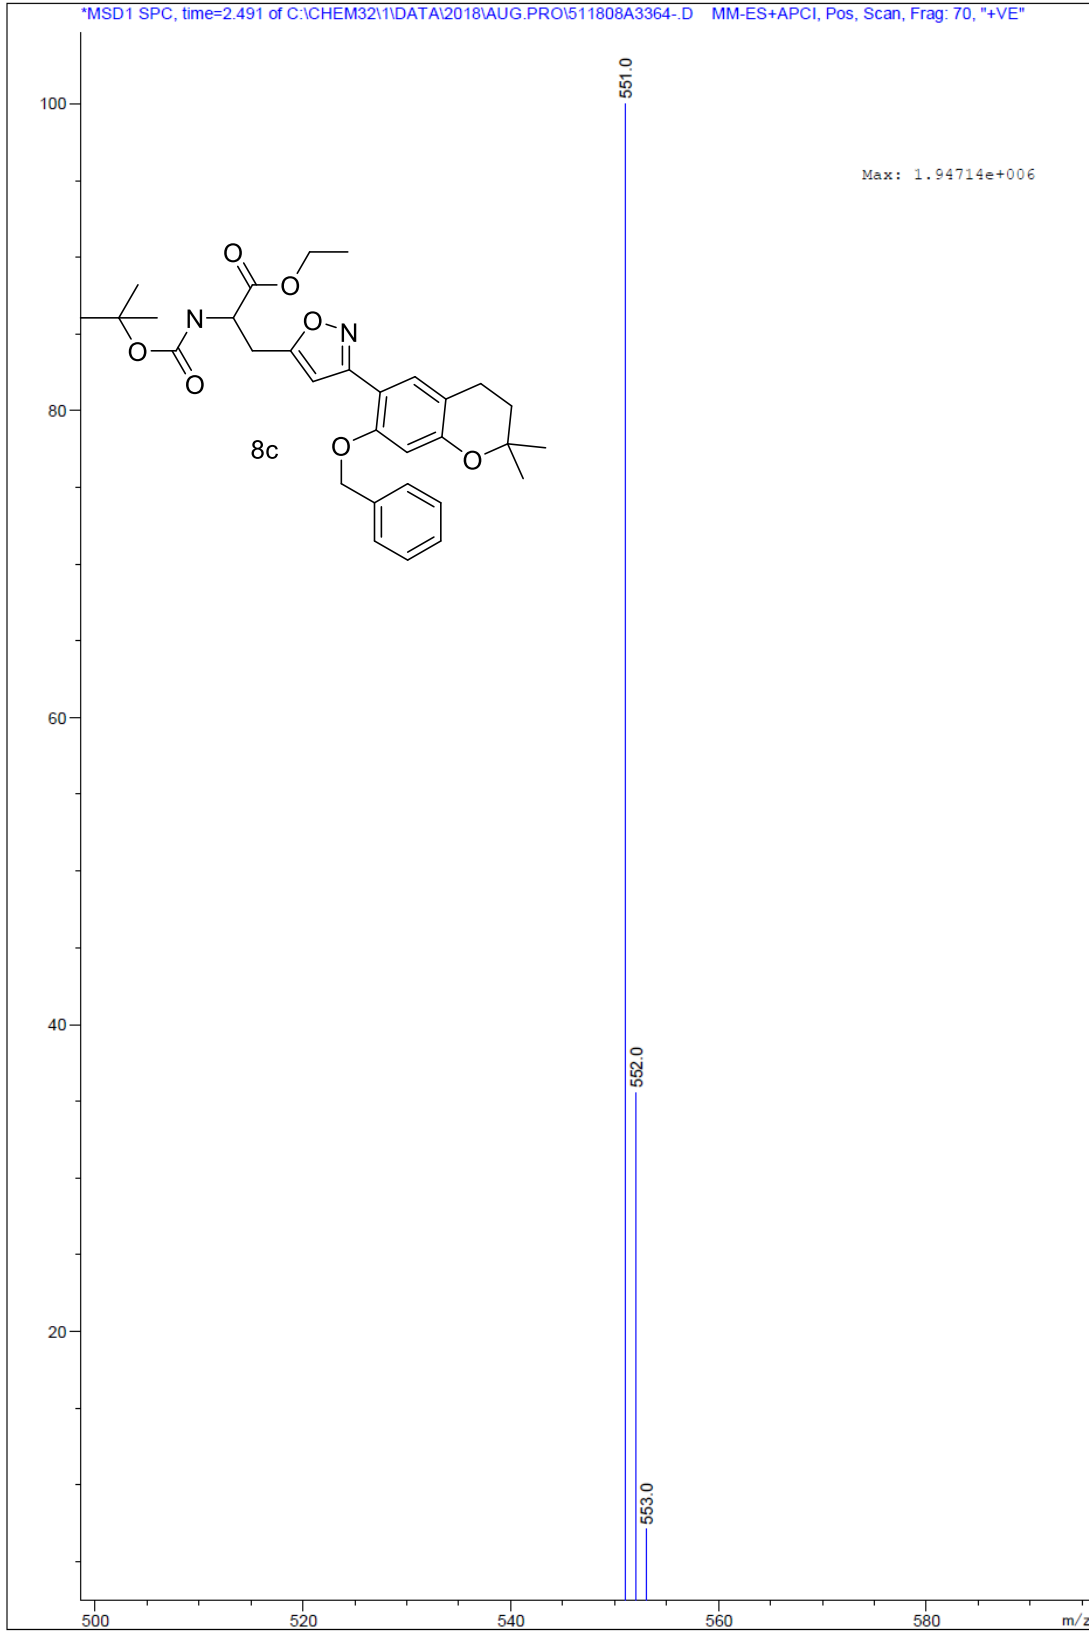

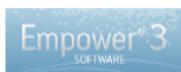

**GVK Biosciences Private Limited**  
**Discovery Chemistry - Analytical Services**  
**SFC Analytical Chromatogram**

User Name: analyst

Project Name: 2021\APR-2021\MALLAPUR\ANL-MCL5-SFC-006-APR-2021

|                   |                             |                     |                                                      |
|-------------------|-----------------------------|---------------------|------------------------------------------------------|
| Sample Name:      | GVK-RAG-1-57                | Acquired By:        | MLRAnalyst                                           |
| Vial:             | 1:C,1                       | Sample Set Name:    | 19_APRIL_2021                                        |
| Injection Volume: | 10.00 ul                    | Acq. Method Set:    | C2_SolvB2_3g_25                                      |
| Date Acquired:    | 19-Apr-2021 07:42:40 PM IST | Proc. Chnl. Descr.: | PDA Spectrum PDA 215.0 nm (PDA Spectrum (200-400)nm) |

SFC Method Conditions :

Column : CHIRALPAK AD-3 (4.6\*150mm)3µm  
Co-solvent : Methanol  
Total flow : 3g/min  
% of Co-Solvent : 25  
ABPR : 1500psi  
Temperature : 30°C

Auto-Scaled Chromatogram

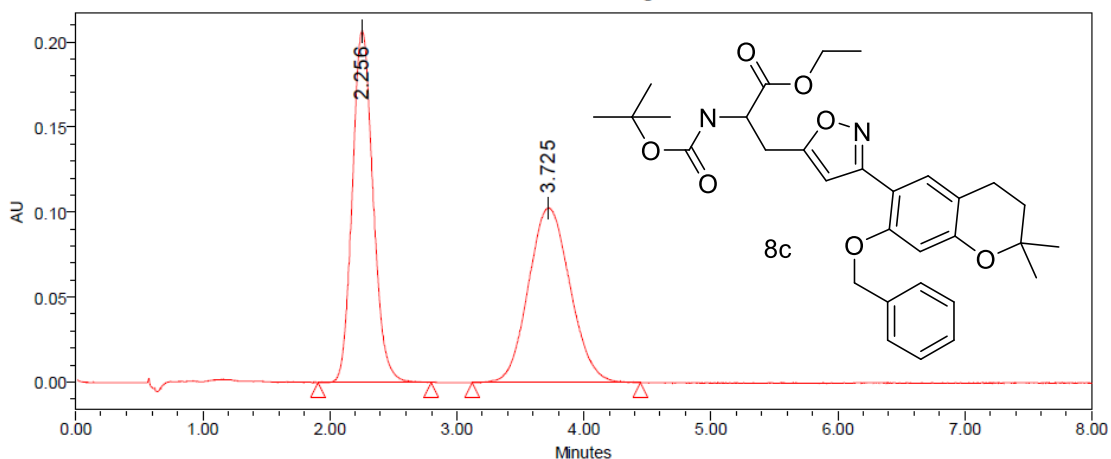

Peak Results

| Name | RT   | Area    | % Area |
|------|------|---------|--------|
| 1    | 2.26 | 2350432 | 50.01  |
| 2    | 3.73 | 2349802 | 49.99  |

Report Template: Chiral Report

Print Date & Time: 19-Apr-2021 07:54:58 PM Asia/Kolkata

GVK-RAG-1-57 PEAK 1

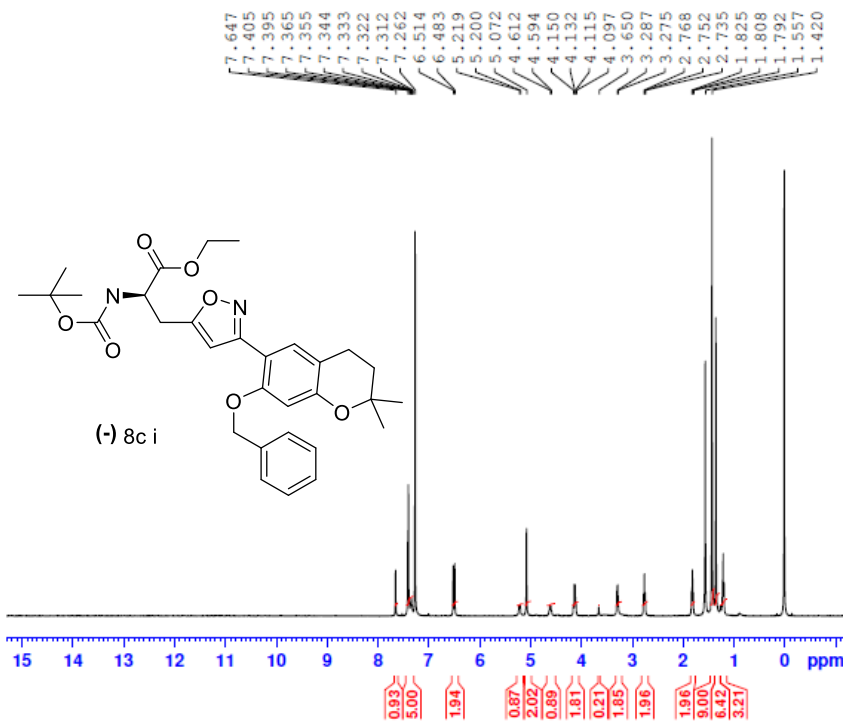

Current Data Parameters  
 NAME: 512104C2556A-GVK-RAG-1-57 PEAK 1  
 METHOD: 1  
 F2 - Acquisition Parameters  
 Date\_: 20210417  
 Time: 3.39 h  
 INJECTION: Average  
 FOLDER: E163739\_0135 (1)  
 FILENAME: 1930  
 TD: 65536  
 SOLVENT: CDCl3  
 NS: 8  
 DS: 0  
 SWH: 8196.722 Hz  
 FIDRES: 0.250144 Hz  
 AQ: 3.931900 sec  
 RG: 101  
 IN: 61.000 umsc  
 DE: 13.493 umsc  
 TE: 293.2  
 CD: 1.00000000 sec  
 TDD: 1  
 SFO1: 400.3024719 MHz  
 NUC1: 13C  
 P1: 2.07 umsc  
 F1: 8.00 umsc  
 PCMR: 22.47400093 M  
 F2 - Processing parameters  
 SI: 65536  
 SF: 400.3000092 MHz  
 MSK: 0  
 SSB: 0  
 LB: 1.00 Hz  
 GB: 0  
 PC: 1.00

ANL-MCL5-NMR-003

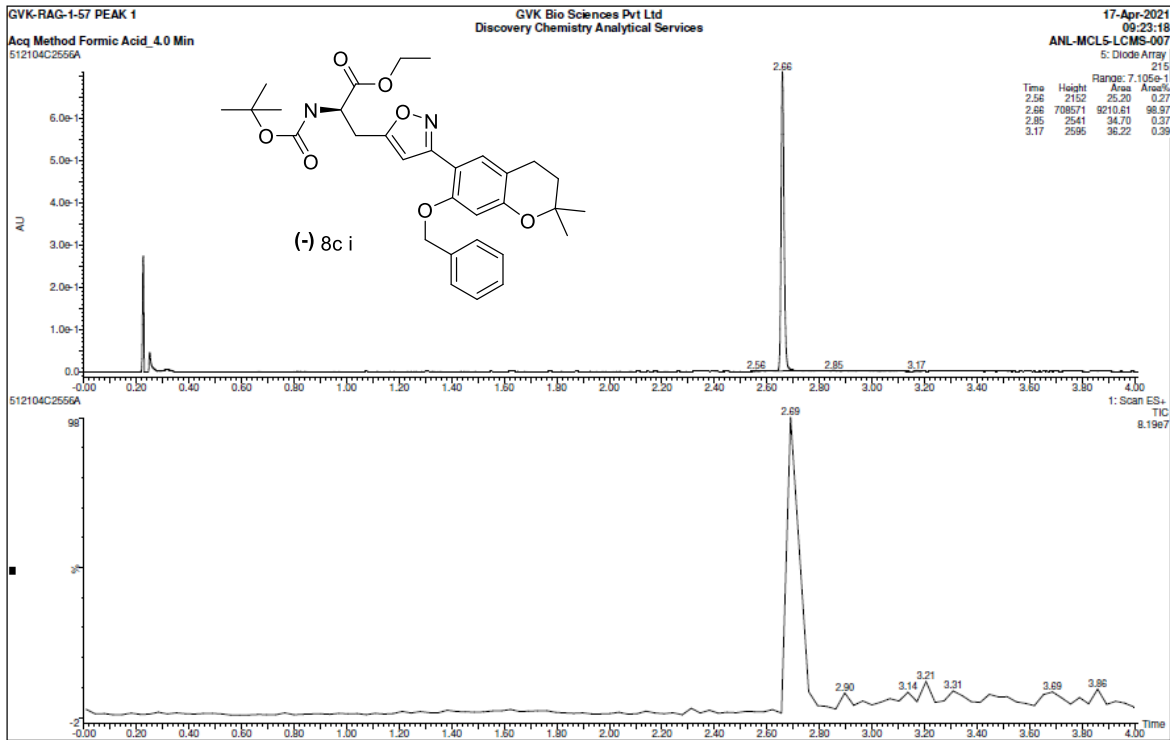



GVK-RAG-1-57 PEAK 1

Acq Method Formic Acid\_4.0 Min  
512104C2556A 79 (2.690)

GVK Bio Sciences Pvt Ltd  
Discovery Chemistry - Analytical Services

17-Apr-2021  
09:23:18  
ANL-MCLS-LCMS-007  
1: Scan ES-  
2.9767

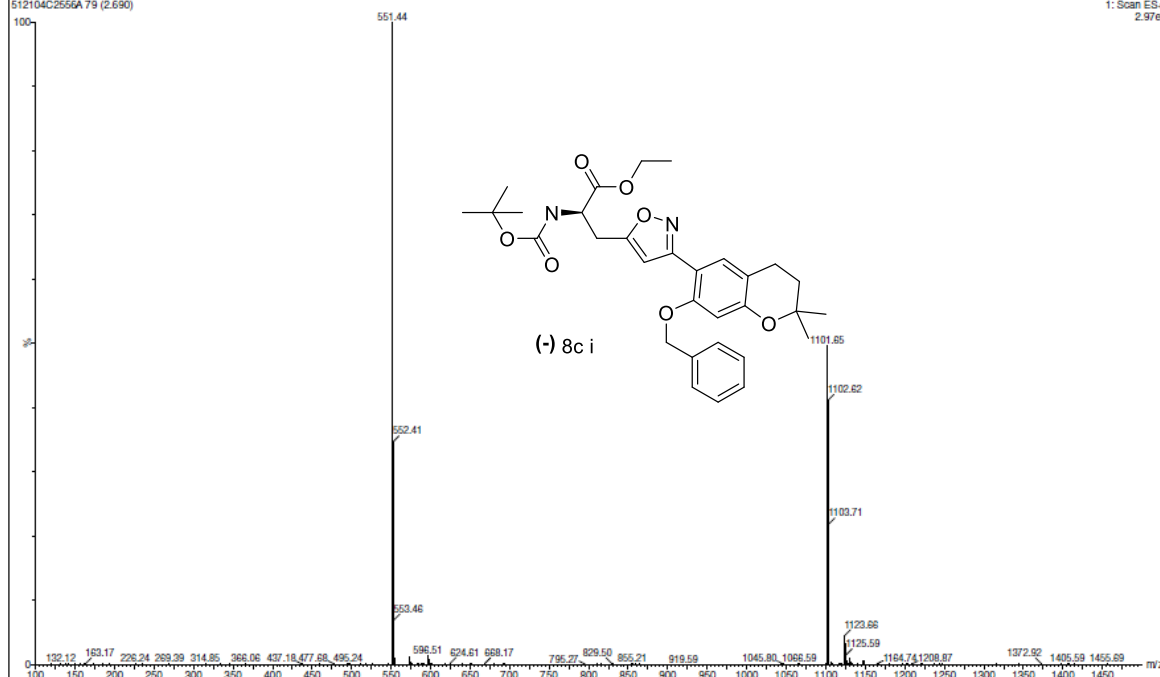

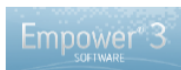

**GVK Biosciences Private Limited**  
**Discovery Chemistry - Analytical Services**

**SFC Analytical Chromatogram**

User Name: analyst

Project Name: 2021\APR-2021\MALLAPUR\ANL-MCL5-SFC-006-APR-2021

|                   |                             |                     |                                                      |
|-------------------|-----------------------------|---------------------|------------------------------------------------------|
| Sample Name:      | GVK-RAG-1-57-PEAK-1         | Acquired By:        | MLRAnalyst                                           |
| Vial:             | 1:C,2                       | Sample Set Name:    | 17_APRIL_2021                                        |
| Injection Volume: | 10.00 ul                    | Acq. Method Set:    | C2_SolvB2_3g_25                                      |
| Date Acquired:    | 17-Apr-2021 10:09:36 AM IST | Proc. Chnl. Descr.: | PDA Spectrum PDA 210.0 nm (PDA Spectrum (200-400)nm) |

SFC Method Conditions :

Column : CHIRALPAK AD-3 (4.6\*150mm)3µm  
Co-solvent : Methanol  
Total flow : 3g/min  
% of Co-Solvent : 25  
ABPR : 1500psi  
Temperature : 30°C

Auto-Scaled Chromatogram

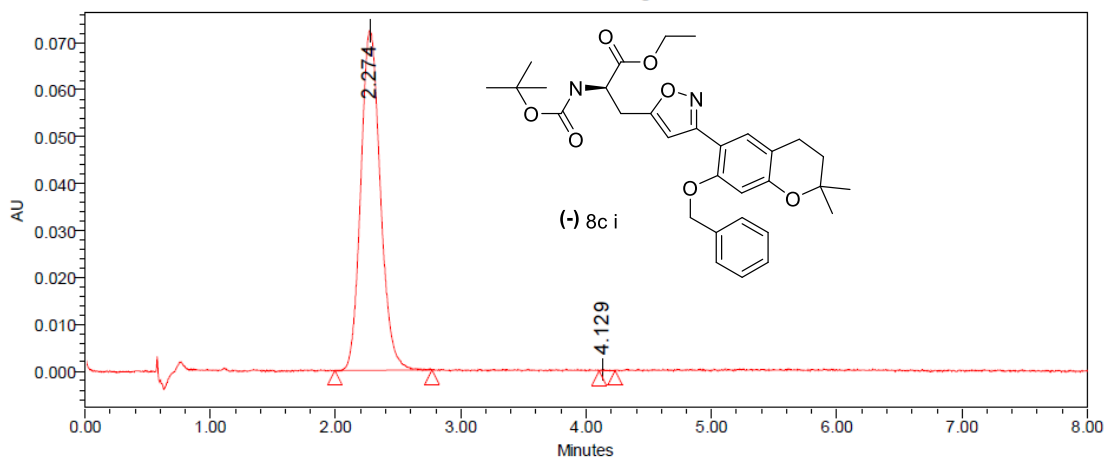

Peak Results

| Name | RT   | Area   | % Area |
|------|------|--------|--------|
| 1    | 2.27 | 787603 | 99.90  |
| 2    | 4.13 | 801    | 0.10   |

## GVK-RAG-1-57 PEAK 1

[Data Information]

Creation Date 17-Apr-2021 17:36

[Measurement Information]

Instrument Name POLARIMETER  
Model Name P-2000  
Serial No. B160661232  
Polarizer Dichrom  
Faraday Cell Flint Glass

Accessory PTC-262  
Accessory S/N C058861481  
Temperature 25.00 C  
Control Sensor Holder  
Monitor Sensor Holder  
Start Mode Start immediately

Light Source WI  
Monitor wavelength 589 nm  
D.I.T. 5 sec  
No. of cycle 5  
Cycle interval 5 sec  
Temp. Monitor Holder  
Temp. Corr. Factor None  
Aperture(S) 8.0mm  
Aperture(L) Auto  
Mode Specific O.R.  
Path Length 50 mm  
Concentration 0.2 w/v%  
Water content of sample 0 %  
Factor 1

[Comment]

Sample name GVK-RAG-1-57 PEAK 1  
Comment CONC= 0.2% in MeOH  
User  
Division  
Company GVK BIO SCIENCES PVT LTD

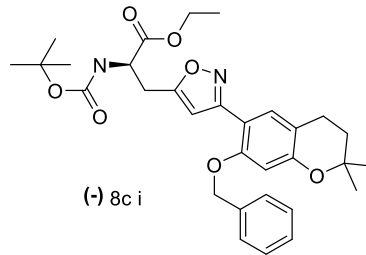

|   | No. | Sample No. | Mode                  | Calc. Data    | Meas. Data | Monitor(deg) | PMT Voltage[V] |     |
|---|-----|------------|-----------------------|---------------|------------|--------------|----------------|-----|
| 1 | *   | 1          | GVK-RAG-1-57 PEAK 1-1 | Specific O.R. | -0.9000    | -0.0009      | -0.0015        | 253 |
| 2 | *   | 2          | GVK-RAG-1-57 PEAK 1-2 | Specific O.R. | -1.5000    | -0.0015      | -0.0021        | 253 |
| 3 | *   | 3          | GVK-RAG-1-57 PEAK 1-3 | Specific O.R. | -1.4000    | -0.0014      | -0.0020        | 253 |
| 4 | *   | 4          | GVK-RAG-1-57 PEAK 1-4 | Specific O.R. | -1.1000    | -0.0011      | -0.0017        | 253 |
| 5 | *   | 5          | GVK-RAG-1-57 PEAK 1-5 | Specific O.R. | -1.3000    | -0.0013      | -0.0019        | 253 |
| 6 | *   | 6          | Avg.                  |               | -1.2400    |              |                |     |
| 7 |     | 7          | S.D                   |               | 0.2408     |              |                |     |
| 8 |     | 8          | C.V                   |               | 19.4219    |              |                |     |

|   | Temperature(C) | Blank   | Measurement Date  | Comment |
|---|----------------|---------|-------------------|---------|
| 1 | 24.99          | -0.0006 | 17-Apr-2021 17:35 |         |
| 2 | 24.99          | -0.0006 | 17-Apr-2021 17:35 |         |
| 3 | 24.99          | -0.0006 | 17-Apr-2021 17:36 |         |
| 4 | 25.00          | -0.0006 | 17-Apr-2021 17:36 |         |
| 5 | 25.00          | -0.0006 | 17-Apr-2021 17:36 |         |
| 6 |                |         |                   |         |
| 7 |                |         |                   |         |
| 8 |                |         |                   |         |

GVK-REAG-2-57 PEAK 2

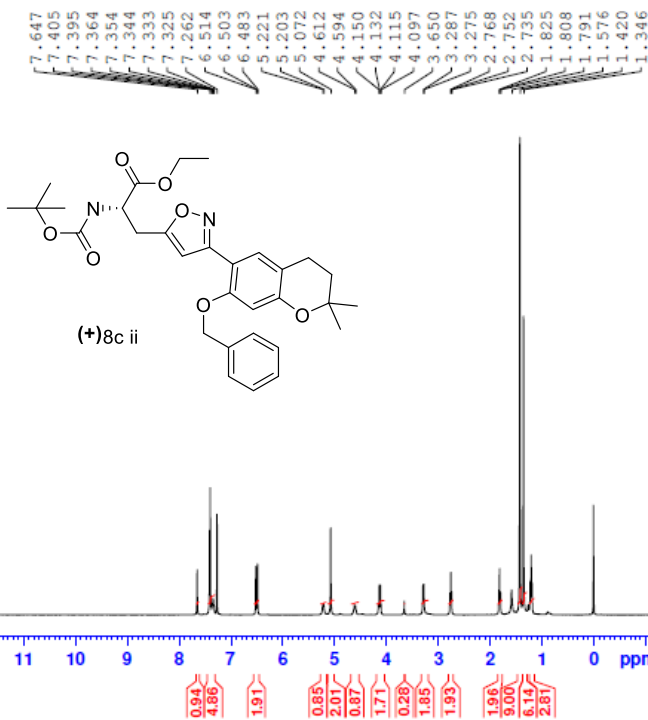

Current Data Parameters  
 NAME: 512104C2134-09-5-REAG-2-57 PEAK 2  
 EXPNO: 1  
 PROCNO: 1

F2 - Acquisition Parameters  
 Date\_: 20210417  
 Time: 3.42 h  
 INSTRUM: Avance  
 PROCNO: 2163731\_0135\_1  
 PULPROG: zg30  
 TD: 65536  
 SOLVENT: CDCl3  
 NS: 8  
 DS: 0  
 SWH: 8196.722 Hz  
 FIDRES: 0.250144 Hz  
 AQ: 3.9974959 sec  
 RG: 101  
 CW: 61.000 usec  
 DE: 13.89 usec  
 TE: 292.7 K  
 DQ: 1.0000000 sec  
 TDO: 1  
 SFO1: 400.3024719 MHz  
 NUC1: 1H  
 P0: 2.67 usec  
 F1: 8.00 usec  
 PL1: 22.47400093 W

F2 - Processing parameters  
 SI: 65536  
 SF: 400.3000091 MHz  
 NH: 8M  
 SSB: 0  
 LB: 1.00 Hz  
 GB: 0  
 PC: 1.00

ANL-MCL5-NMR-003

Acq Method Formic Acid\_4.0 Min

ANL-MCL5-LCMS-007

512104C2557A

5: DiodeArray

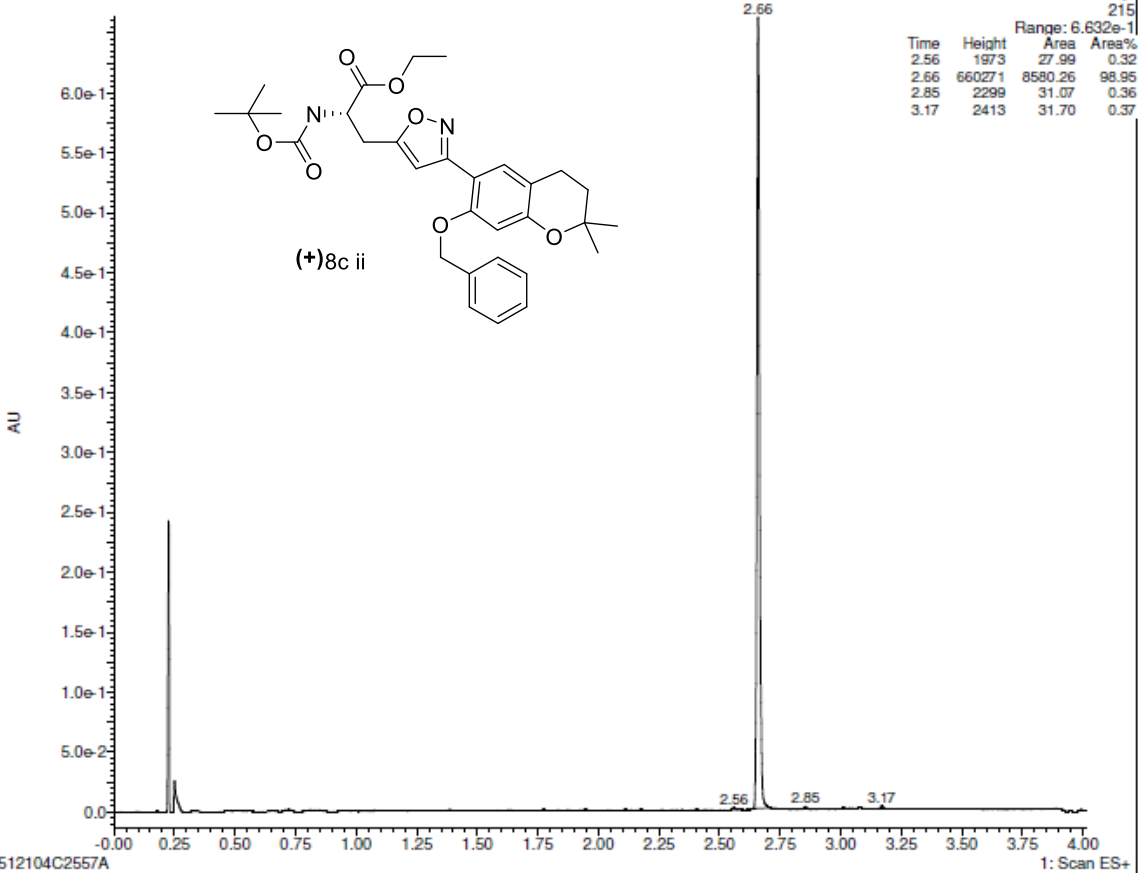

512104C2557A

1: Scan ES+

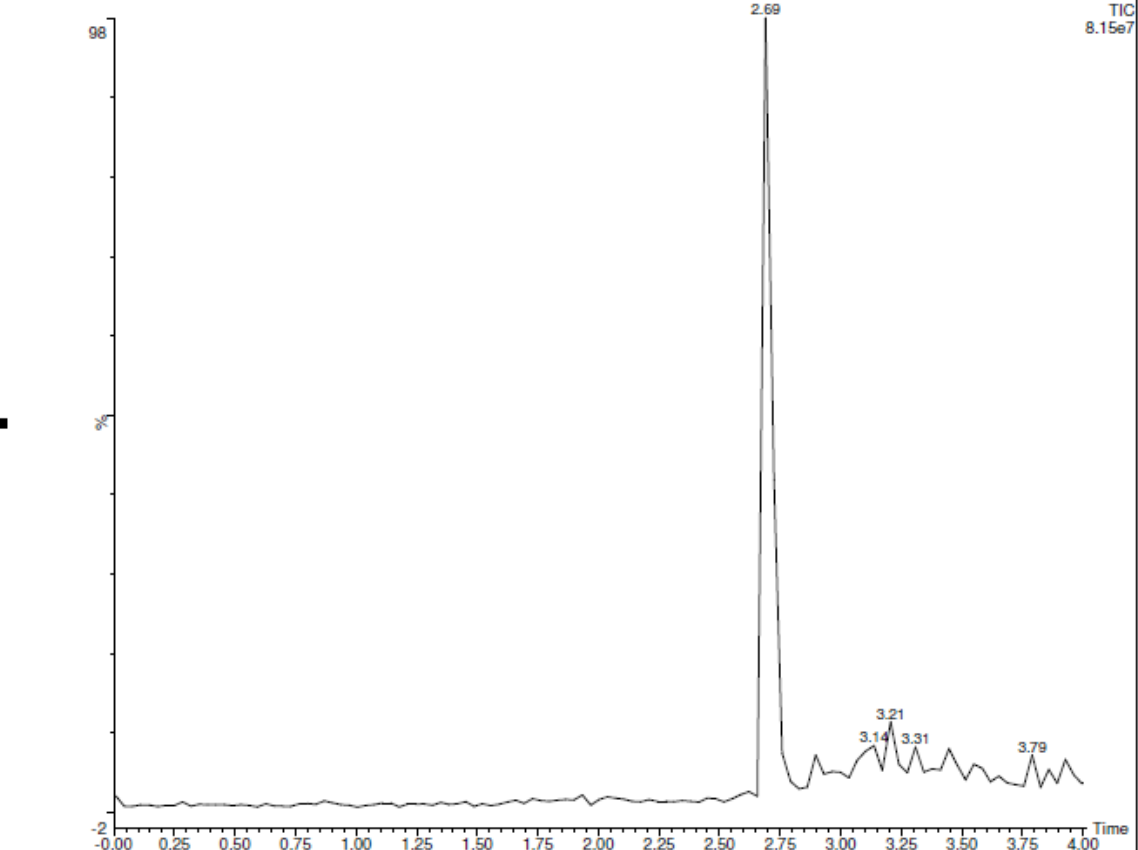

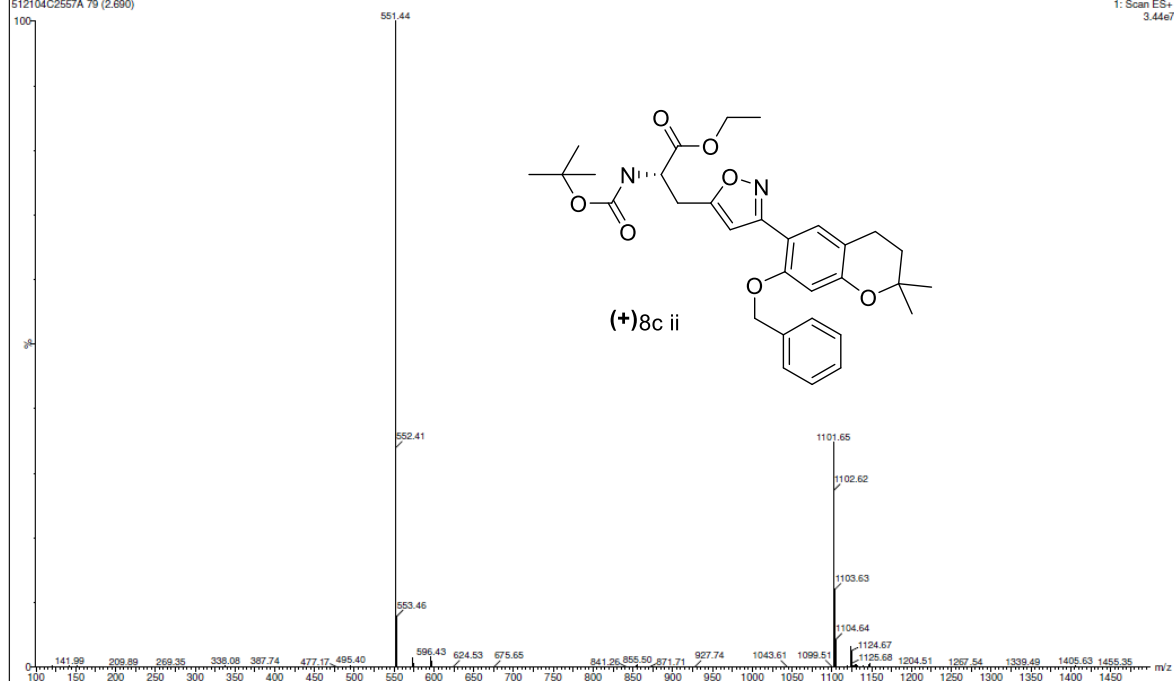

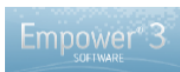

**GVK Biosciences Private Limited**  
**Discovery Chemistry - Analytical Services**

**SFC Analytical Chromatogram**

User Name: analyst

Project Name: 2021\APR-2021\MALLAPUR\ANL-MCL5-SFC-006-APR-2021

|                   |                             |                     |                                                      |
|-------------------|-----------------------------|---------------------|------------------------------------------------------|
| Sample Name:      | GVK-RAG-1-57-PEAK-2         | Acquired By:        | MLRAnalyst                                           |
| Vial:             | 1:C,1                       | Sample Set Name:    | 17_APRIL_2021                                        |
| Injection Volume: | 10.00 ul                    | Acq. Method Set:    | C2_SolVB2_3g_25                                      |
| Date Acquired:    | 17-Apr-2021 09:53:22 AM IST | Proc. Chnl. Descr.: | PDA Spectrum PDA 210.0 nm (PDA Spectrum (200-400)nm) |

SFC Method Conditions :

Column : CHIRALPAK AD-3 (4.6\*150mm)3µm  
Co-solvent : Methanol  
Total flow : 3g/min  
% of Co-Solvent : 25  
ABPR : 1500psi  
Temperature : 30°C

Auto-Scaled Chromatogram

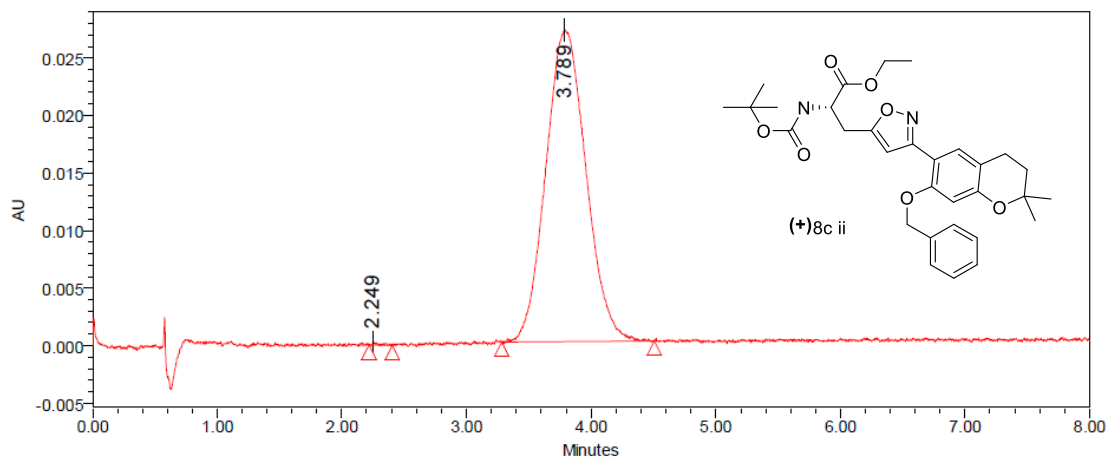

Peak Results

| Name | RT   | Area   | % Area |
|------|------|--------|--------|
| 1    | 2.25 | 876    | 0.14   |
| 2    | 3.79 | 607350 | 99.86  |

Report Template: Chiral Report

Print Date & Time: 17-Apr-2021 11:43:31 AM Asia/Kolkata

## C5748-PEAK 2

[Data Information]

Creation Date 17-Apr-2021 17:49

[Measurement Information]

Instrument Name POLARIMETER  
Model Name P-2000  
Serial No. B160661232  
Polarizer Dichrom  
Faraday Cell Flint Glass

Accessory PTC-262  
Accessory S/N C058861481  
Temperature 25.00 C  
Control Sensor Holder  
Monitor Sensor Holder  
Start Mode Start immediately

Light Source W1  
Monitor wavelength 589 nm  
D.I.T. 5 sec  
No. of cycle 5  
Cycle interval 5 sec  
Temp. Monitor Holder  
Temp. Corr. Factor None  
Aperture(S) 8.0mm  
Aperture(L) Auto  
Mode Specific O.R.  
Path Length 50 mm  
Concentration 0.2 w/v%  
Water content of sample 0 %  
Factor 1

[Comment]

Sample name C5748-PEAK 2  
Comment CONC= 0.2% in MeOH  
User  
Division  
Company GVK BIO SCIENCES PVT LTD

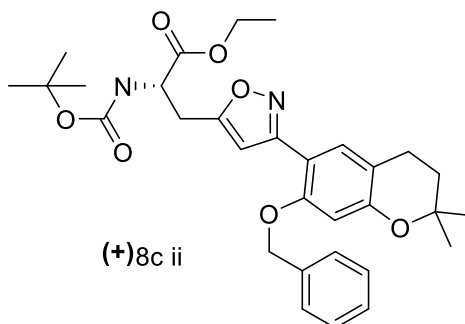

|   | No. | Sample No.       | Mode          | Calc. Data | Meas. Data | Monitor(deg) | PMT Voltage[V] | Temperature(C) |
|---|-----|------------------|---------------|------------|------------|--------------|----------------|----------------|
| 1 | *   | 1 C5748-PEAK 2-1 | Specific O.R. | +1.8000    | +0.0018    | +0.0012      | 263            | 25.00          |
| 2 | *   | 2 C5748-PEAK 2-2 | Specific O.R. | +1.7000    | +0.0017    | +0.0011      | 263            | 25.00          |
| 3 | *   | 3 C5748-PEAK 2-3 | Specific O.R. | +1.9000    | +0.0019    | +0.0013      | 263            | 24.99          |
| 4 | *   | 4 C5748-PEAK 2-4 | Specific O.R. | +1.5000    | +0.0015    | +0.0009      | 263            | 25.00          |
| 5 | *   | 5 C5748-PEAK 2-5 | Specific O.R. | +0.9000    | +0.0009    | +0.0003      | 263            | 25.00          |
| 6 | *   | 6 Avg.           |               | +1.5600    |            |              |                |                |
| 7 |     | 7 S.D            |               | 0.3975     |            |              |                |                |
| 8 |     | 8 C.V            |               | 25.4803    |            |              |                |                |

|   | Blank   | Measurement Date  | Comment |
|---|---------|-------------------|---------|
| 1 | -0.0006 | 17-Apr-2021 17:49 |         |
| 2 | -0.0006 | 17-Apr-2021 17:49 |         |
| 3 | -0.0006 | 17-Apr-2021 17:49 |         |
| 4 | -0.0006 | 17-Apr-2021 17:49 |         |
| 5 | -0.0006 | 17-Apr-2021 17:49 |         |
| 6 |         |                   |         |
| 7 |         |                   |         |
| 8 |         |                   |         |



GVK-RAG-1-33  
AR NO-NMR/18/03/0977

Reference Code: 511803A8655-GVK-RAG-1-33  
Solvent: cdcl3  
Archive directory:  
/home/gvkbio/data/2018/Mar  
Agilent 400-MXDD2  
Data collected on: Mar 9 2018  
Experiment: PROTON

edb17206003

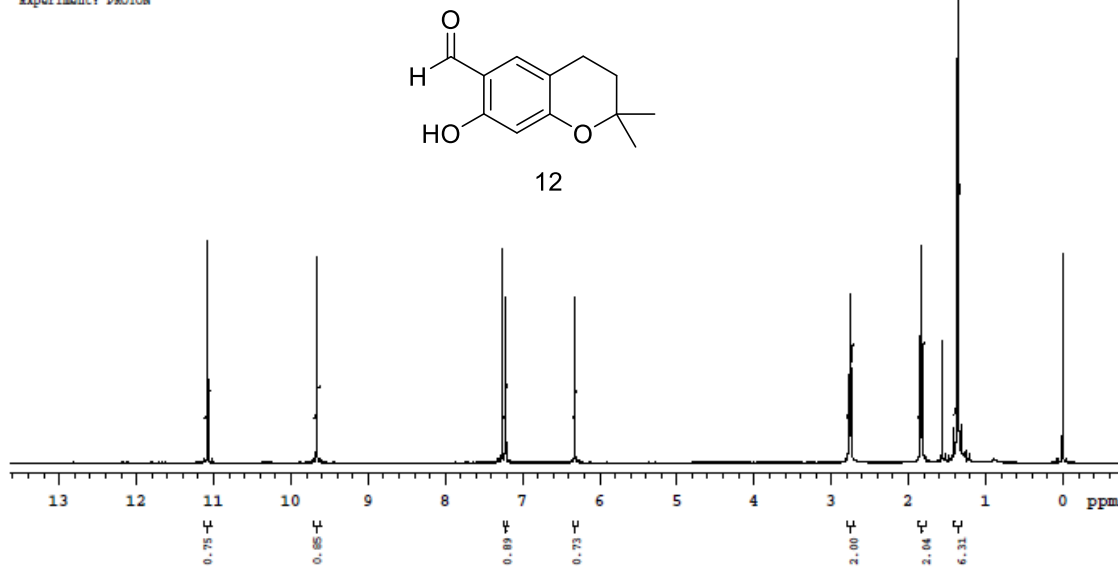

GVK-RAG-1-33  
AR NO-NMR/18/03/0977

Reference Code: 511803A8655-GVK-RAG-1-33  
Solvent: cdcl3  
Archive directory:  
/home/gvkbio/data/2018/Mar  
Agilent 400-MXDD2  
Data collected on: Mar 9 2018  
Experiment: PROTON

edb17206003

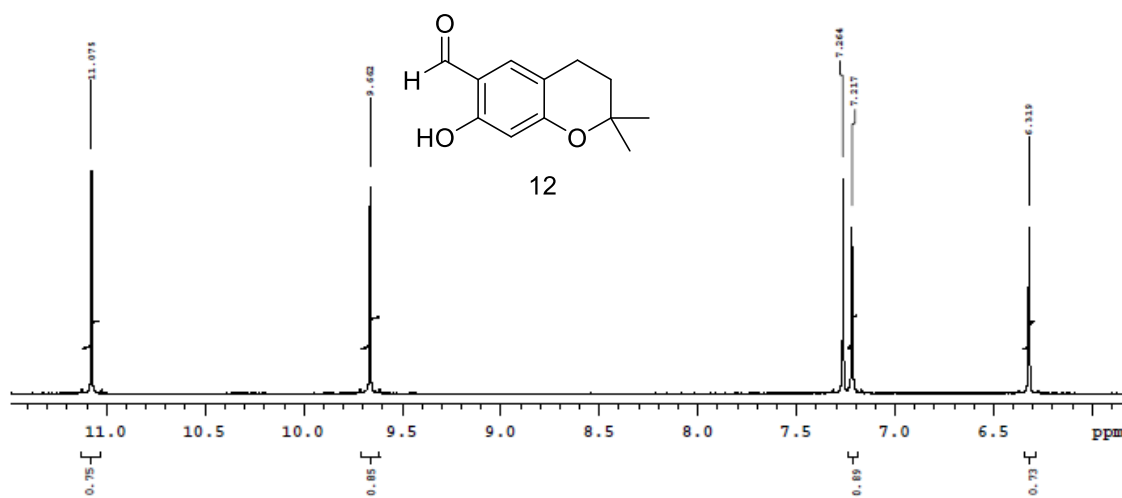

GVK-RAG-1-33  
AR NO-NMR/18/03/0977

edb17206003

Reference Code: 511803A8655-GVK-RAG-1-33  
Solvent: cdcl3  
Archive directory:  
/home/gvkbio/data/2018/Mar  
Agilent 400-MEED2  
Data collected on: Mar 9 2018  
Experiment: PROTON

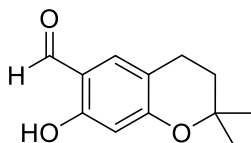

12

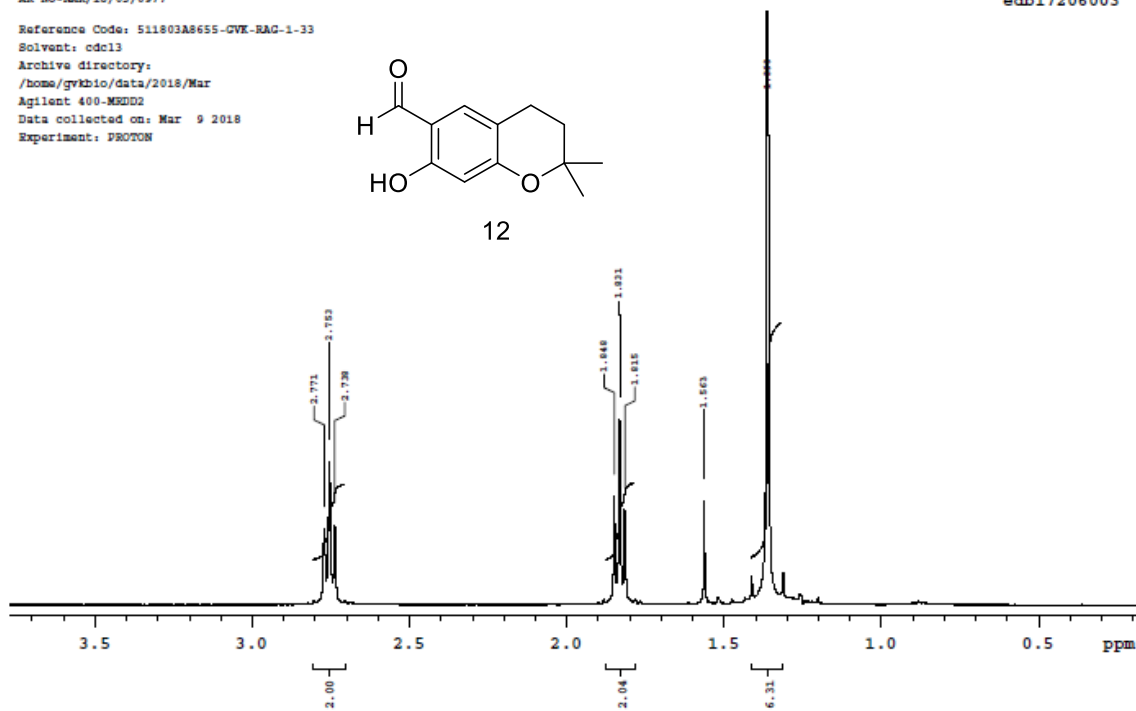

**GVK Biosciences (Pvt.) Ltd.**  
**Analytical Research and Development**

|                   |                      |                       |                           |
|-------------------|----------------------|-----------------------|---------------------------|
| Data File:        | BG_511803A8654       | Sample Name :         | P-3323-8-FMC-GVK-G4920-40 |
| Instrument Name : | N/A                  | Injection Volume(μl): | 2.00                      |
| Comments:         |                      | Vial:                 | GE7                       |
| Sample Type:      | Unknown              | Run Time(min):        | 5.01                      |
| Acquisition Date: | 03/09/18 05:45:29 PM |                       |                           |

**LC Method Details :**

---

Method : GVK\_5MIN; GVK\_LCMS\_40  
 Mobile Phase A: 0.1% FA in Water  
 Mobile Phase B: 0.1% FA in ACN  
 Gradient % of B: 0/80,8/80  
 Flow : 0.8ml/min  
 Column : Acquity UPLC BEH C18, 2.1\*50mm, 1.7um,  
 Column temperature : 40c

---

Detector Type: PDA  
 Wavelength Range 1 (nm): N/A

**UV Chromatogram**

RT: 0.00 - 5.01 SM: 11G

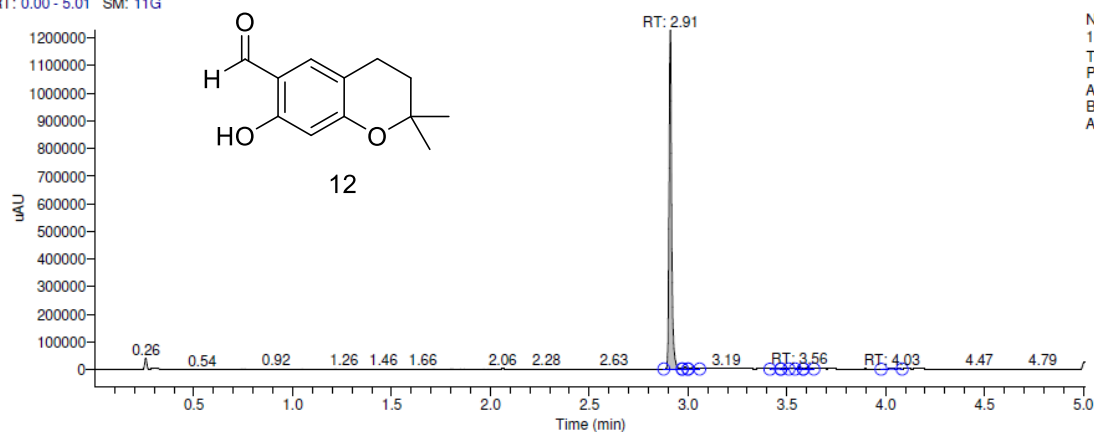

| RT   | Peak Height | Peak Area  | Area % |
|------|-------------|------------|--------|
| 2.91 | 1226029.98  | 1165595.71 | 95.37  |
| 2.99 | 7239.23     | 7425.10    | 0.61   |
| 3.03 | 8169.62     | 9797.23    | 0.80   |
| 3.43 | 3243.98     | 8213.00    | 0.67   |
| 3.49 | 4485.95     | 6531.16    | 0.53   |
| 3.56 | 6635.38     | 8743.25    | 0.72   |
| 3.60 | 6213.84     | 9172.04    | 0.75   |
| 4.03 | 2100.58     | 6669.41    | 0.55   |

Operator: Thermo Scientific  
 Instrument Name: N/A

Page 1 of 1  
 Friday, March 09, 2018, 17:46:04

IT: 0.00 - 5.01

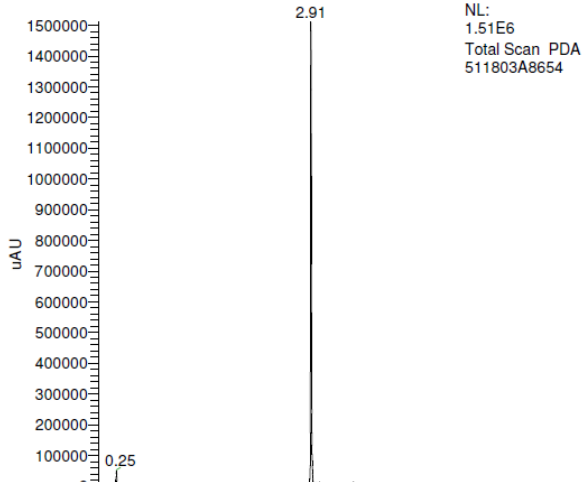

511803A8654 #303 RT: 2.95 AV: 1 NL: 2.30E4  
F: ITMS + c APCI corona Full ms [80.00-1000.00]

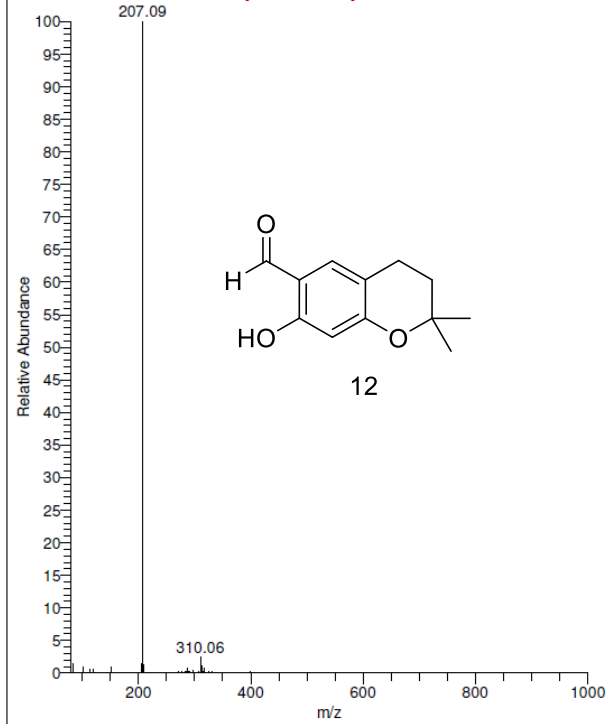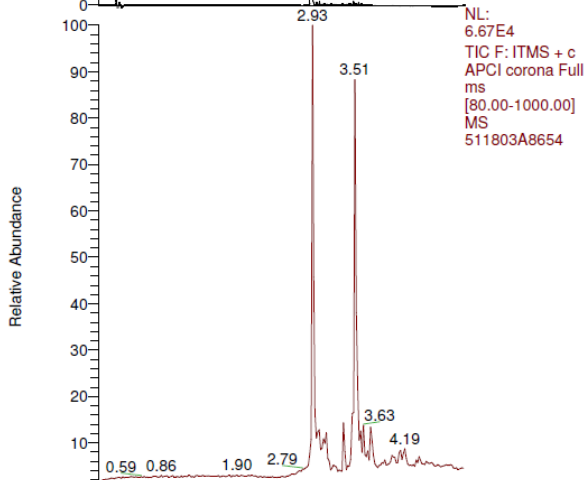

511803A8654 #311 RT: 3.03 AV: 1 NL: 1.94E3  
F: ITMS + c APCI corona Full ms [80.00-1000.00]

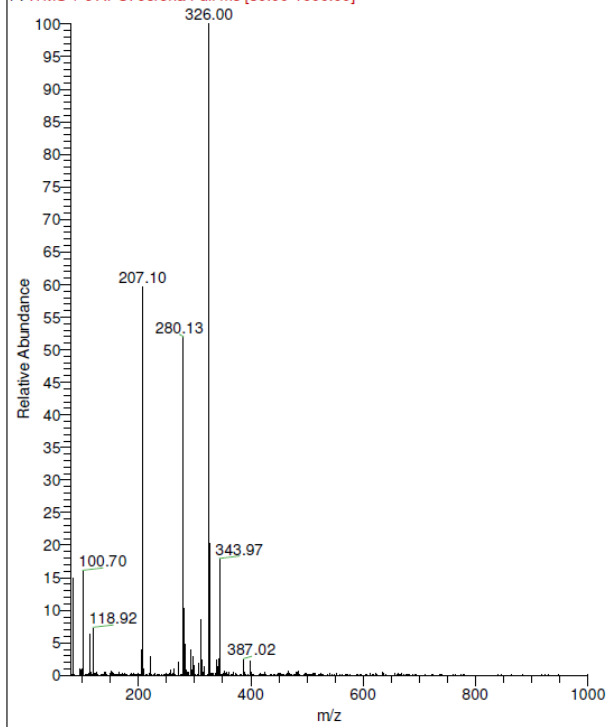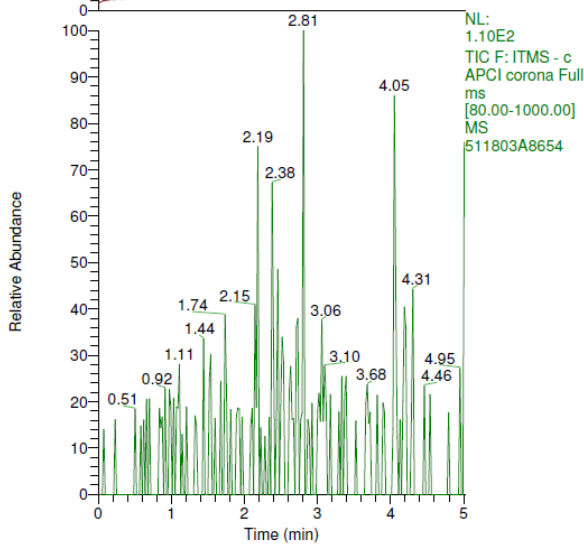

GVK-RAG-1-39  
AR NO-NMR/18/03/2066

Reference Code: 511803B8257-GVK-RAG-1-39  
Solvent: cdcl3  
Archive directory:  
/home/gvkhio/data/2018/Mar  
Agilent 400-MRDD2  
Data collected on: Mar 20 2018  
Experiment: PROTON

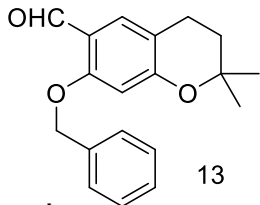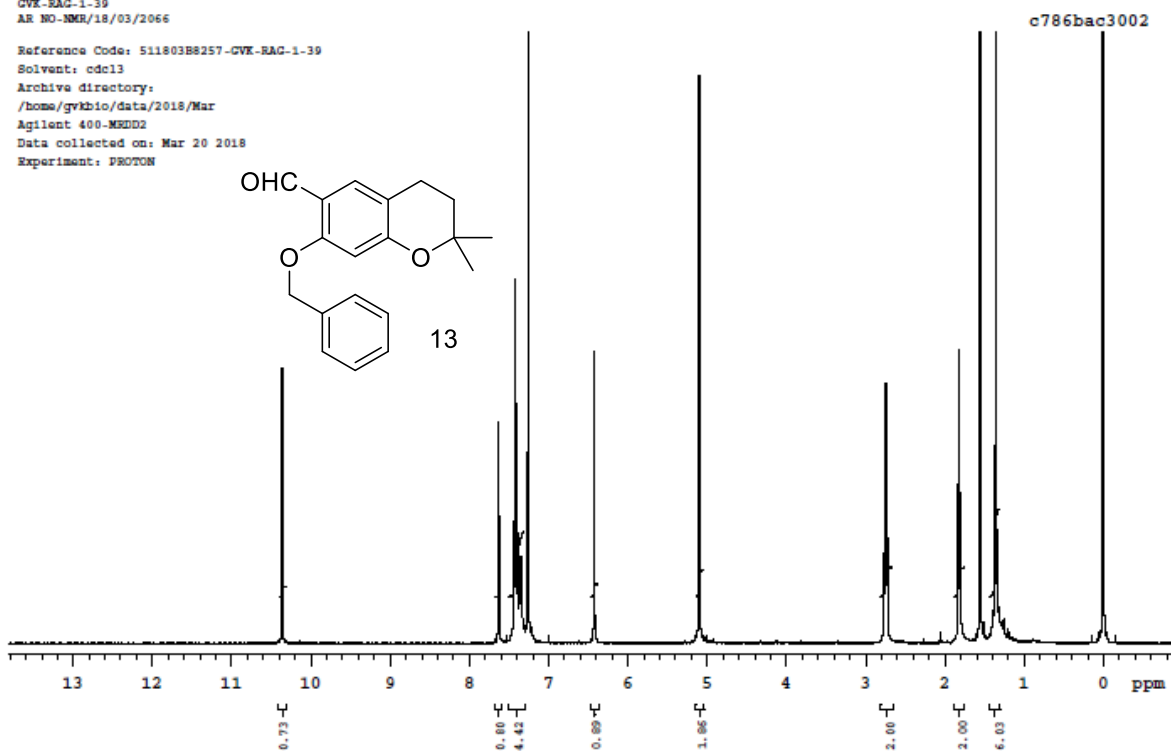

GVK-RAG-1-39  
AR NO-NMR/18/03/2066

c786bac3002

Reference Code: 511803B8257-GVK-RAG-1-39  
Solvent: cdcl3  
Archive directory:  
/home/gvkbio/data/2018/Mar  
Agilent 400-MXDD2  
Data collected on: Mar 20 2018  
Experiment: PROTON

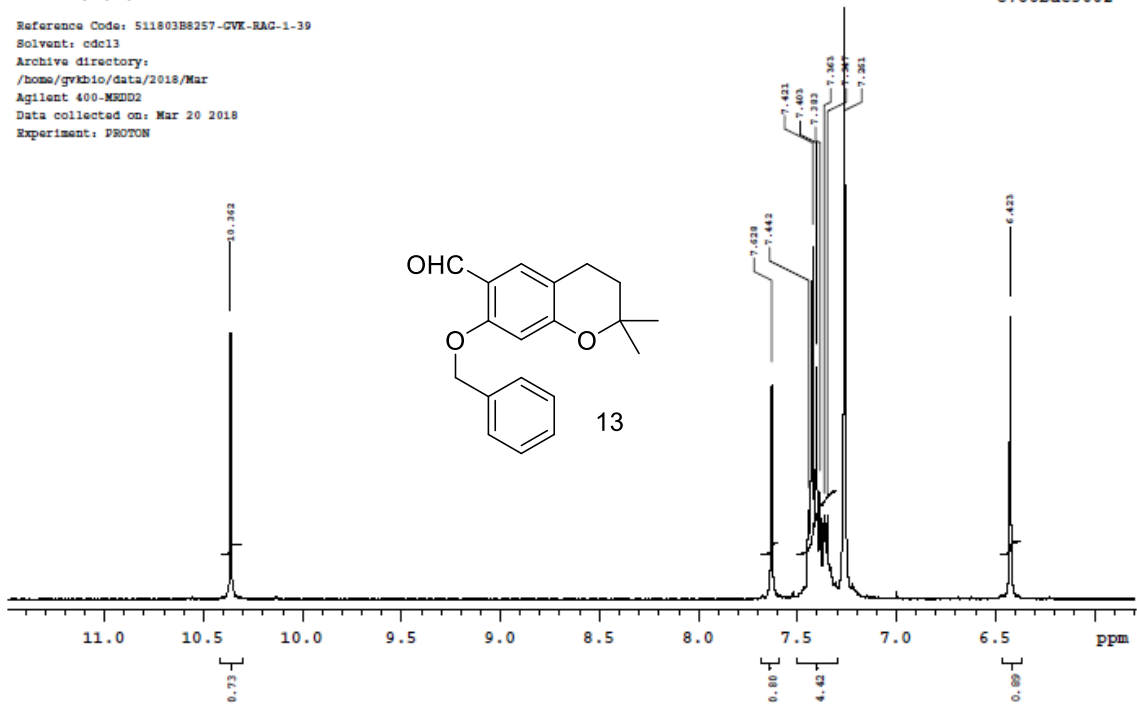

GVK-RAG-1-39  
AR NO-NMR/18/03/2066

c786bac3002

Reference Code: 511803B8257-GVK-RAG-1-39  
Solvent: cdcl3  
Archive directory:  
/home/gvkbio/data/2018/Mar  
Agilent 400-MXDD2  
Data collected on: Mar 20 2018  
Experiment: PROTON

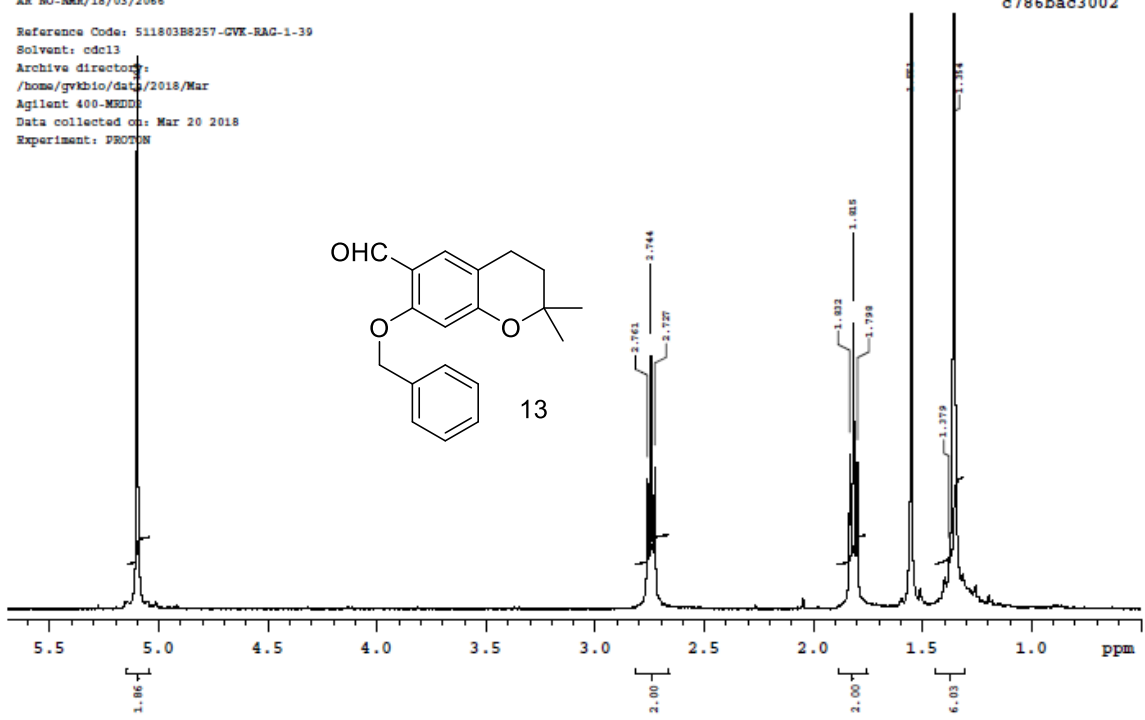

LC/MS REPORT

-----  
 Date of Analysis : 3/20/2018 TIME : 3:06:14 PM Vial position: P1-A-03  
 Sample Name : GVK-RAG-1-39 Injection Vol: 0.300 µL  
 Acq. Method : C:\CHEM32\1\METHODS\RND-FA-3.2-MIN.M Instrument Name:ANL-MCL5-LCMS-002  
 -----

Acq Method Conditions : RND-FA-3.2-MIN  
 Column : Acquity UPLC BEH C18 (50mmx2.1 mm,1.7µm)  
 Mobile phase:A: 0.1% of Formic Acid in Water,B: 0.1% of Formic acid in Acetonitrile  
 Gradient : Time(min)/ %B 0/2,0.2/2,1.5/98,2.6/98,2.61/2,3.2/2  
 Column temperature :45 C,Flow rate :0.8 ml/mn  
 -----

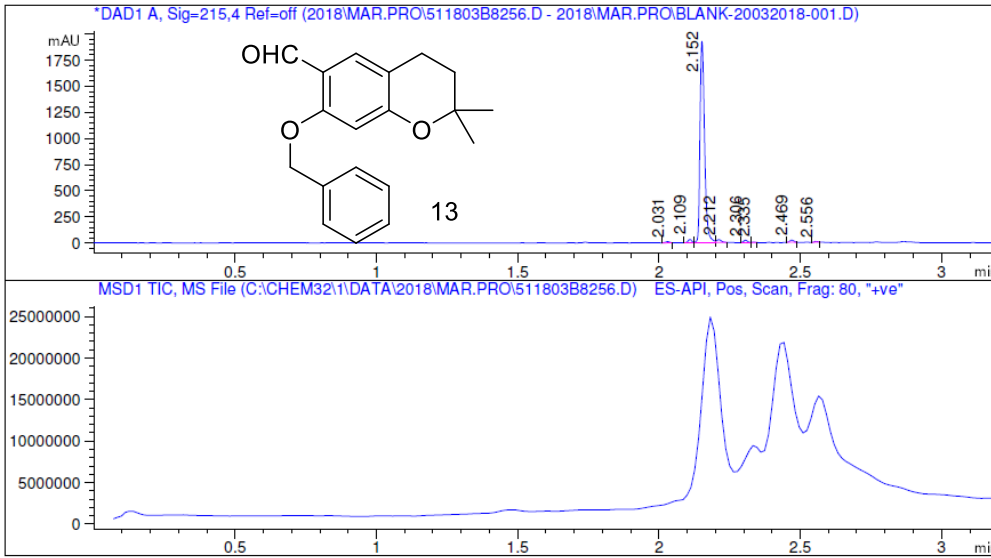

DAD1 A, Sig=215,4 Ref=off

| PEAK No | RT min | Height  | Area     | Area % |
|---------|--------|---------|----------|--------|
| 1       | 2.031  | 12.089  | 13.044   | 0.574  |
| 2       | 2.109  | 32.577  | 29.667   | 1.306  |
| 3       | 2.152  | 1.936e3 | 2144.274 | 94.360 |
| 4       | 2.212  | 27.662  | 32.752   | 1.441  |
| 5       | 2.306  | 20.950  | 19.598   | 0.862  |
| 6       | 2.335  | 3.254   | 2.783    | 0.122  |
| 7       | 2.469  | 20.614  | 21.121   | 0.929  |
| 8       | 2.556  | 8.668   | 9.187    | 0.404  |

MSD1 TIC, MS File

| PEAK No | RT min | Height | Area | Area % |
|---------|--------|--------|------|--------|
|         |        |        |      |        |

MS Spectrum

\*MSD1 SPC, time=2.182 of C:\CHEM32\1\DATA\2018\MAR.PRO\511803B8256.D ES-API, Pos, Scan, Frag: 80, "+ve"

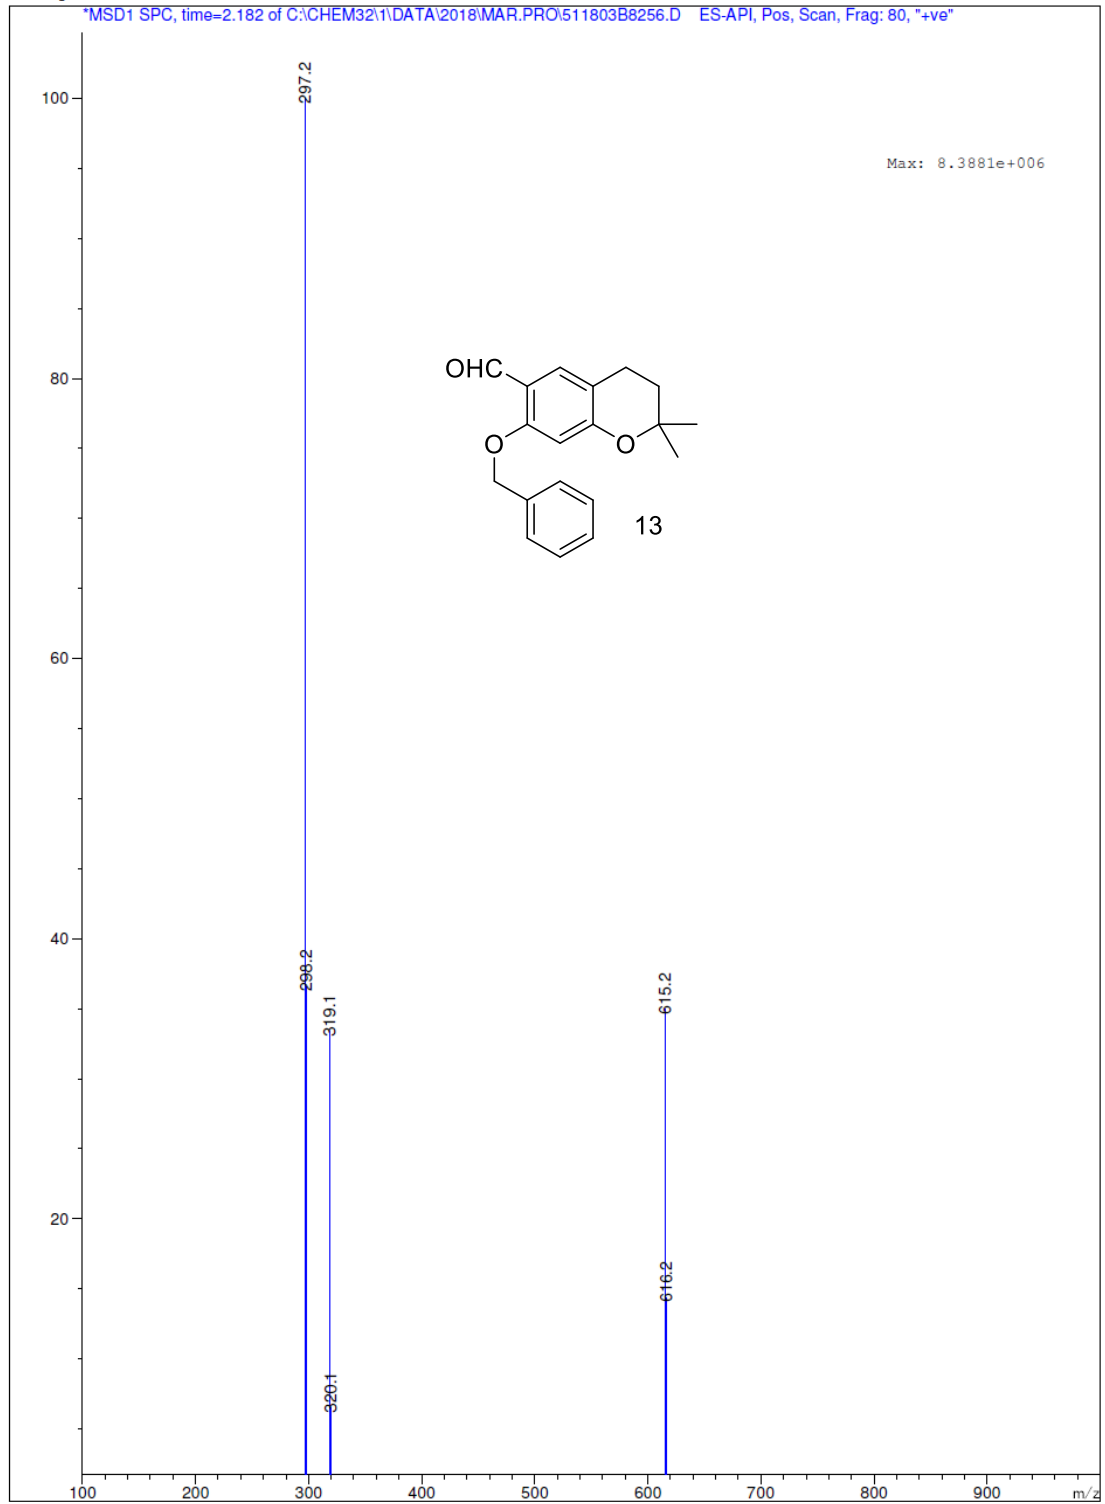



GVK-RAG-1-35  
AR NO-NMR/18/03/1480

Reference Code: 511803B3301-GVK-RAG-1-35  
Solvent: cdcl3  
Archive directory:  
/home/gvkbio/data/2018/Mar  
Agilent 400-MKDD2  
Data collected on: Mar 14 2018  
Experiment: PROTON

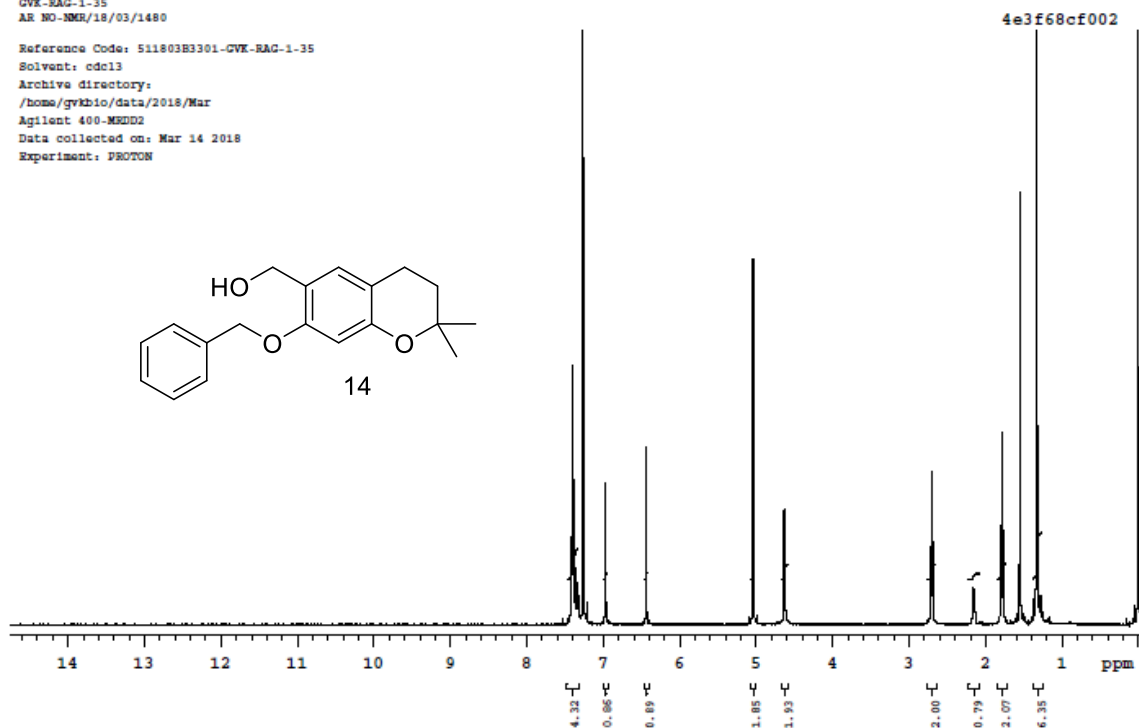

Plotname: 511803B3301-GVK-RAG-1-35\_PROTON\_01.REC\_plot01

GVK-RAG-1-35  
AR NO-NMR/18/03/1480

Reference Code: 511803B3301-GVK-RAG-1-35  
Solvent: cdcl3  
Archive directory:  
/home/gvkbio/data/2018/Mar  
Agilent 400-MKDD2  
Data collected on: Mar 14 2018  
Experiment: PROTON

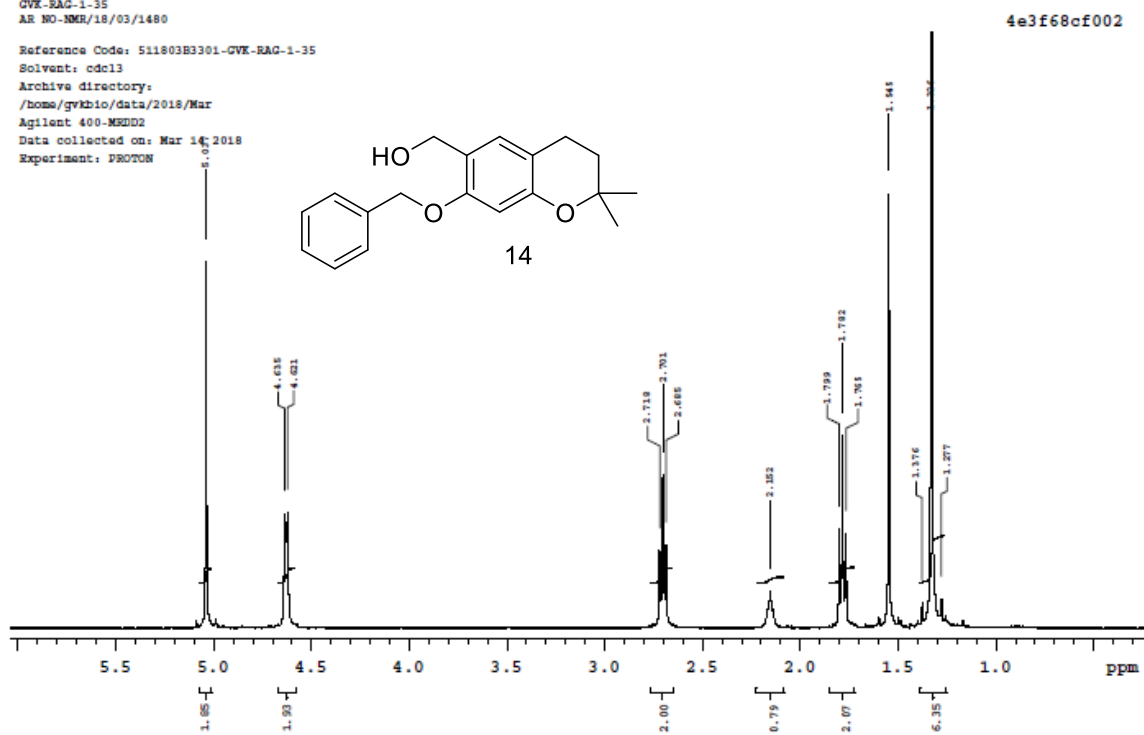

Plotname: 511803B3301-GVK-RAG-1-35\_PROTON\_01.REC\_plot03

GVK-RAG-1-35  
AR NO-NMR/18/03/1480

4e3f68cf002

Reference Code: 511803B3301-GVK-RAG-1-35  
Solvent: cdcl3  
Archive directory:  
/home/gvkbio/data/2018/Mar  
Agilent 400-MRDD2  
Data collected on: Mar 14 2018  
Experiment: PROTON

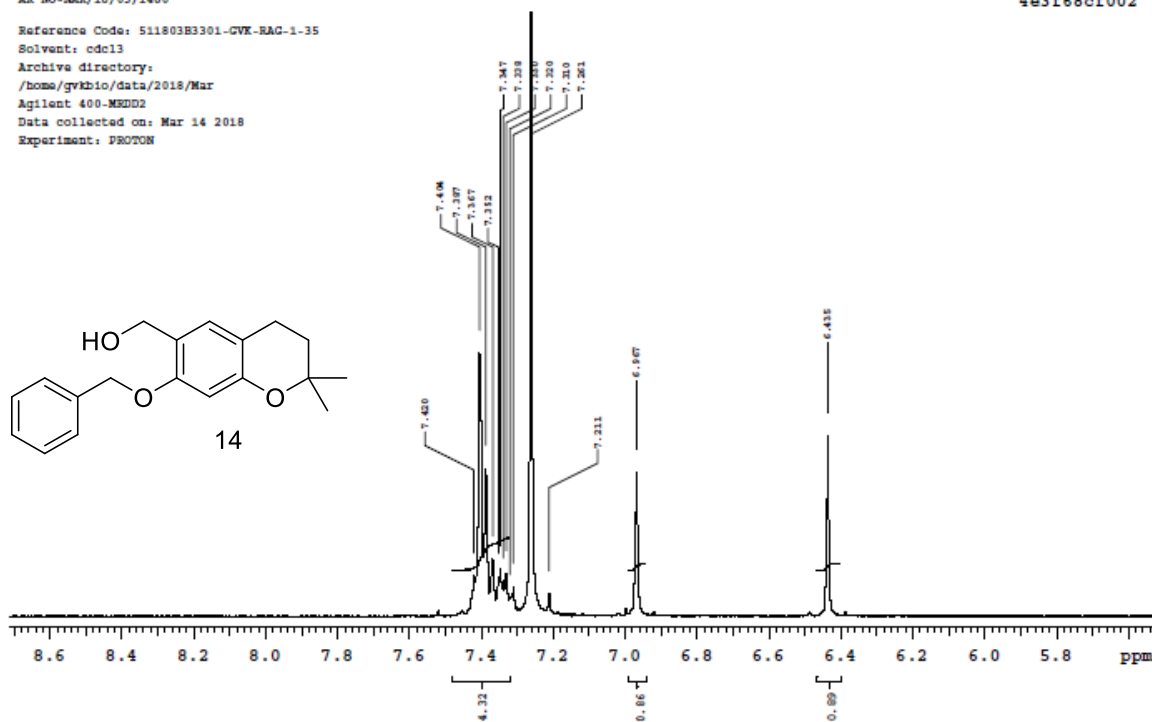

Plotname: 511803B3301-GVK-RAG-1-35\_PROTON\_01.REC plot02

GVK-RAG-1-35-D2OEXC  
AR NO-NMR/18/03/1480

1899e753002

Reference Code: 511803B3301-GVK-RAG-1-35-D2OEXC  
Solvent: cdcl3  
Archive directory:  
/home/gvkbio/data/2018/Mar  
Agilent 400-MRDD2  
Data collected on: Mar 15 2018  
Experiment: PROTON

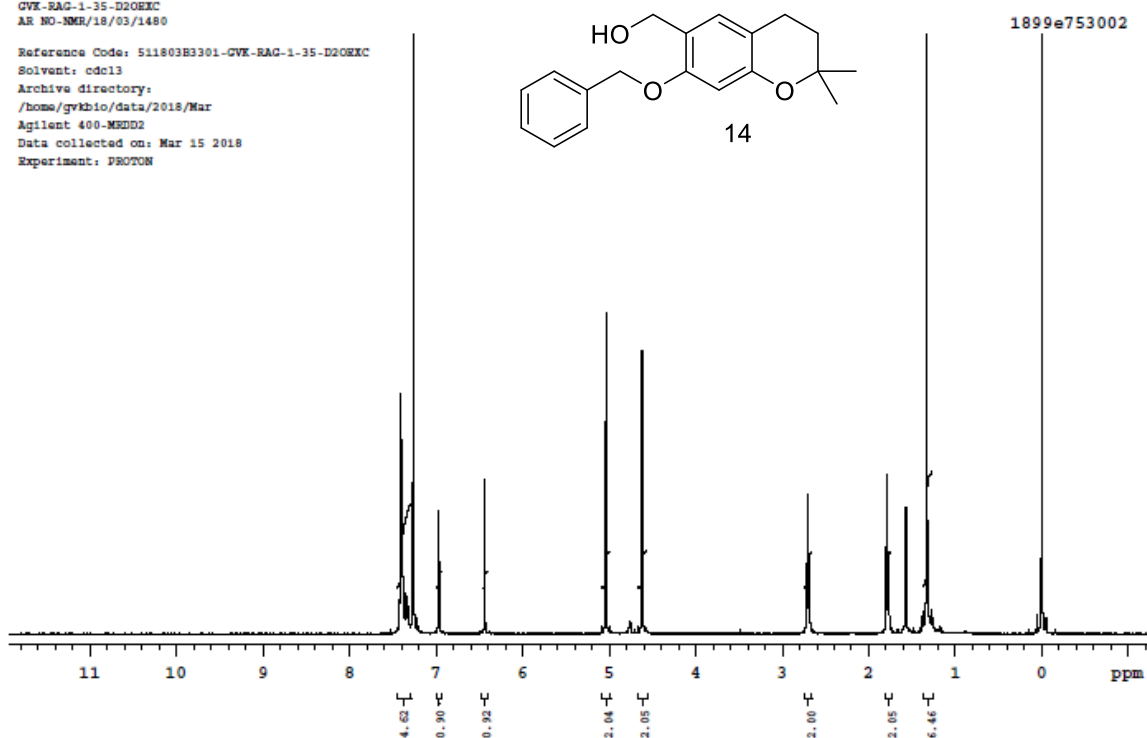

Plotname: 511803B3301-GVK-RAG-1-35-D2OEXC\_PROTON\_01.REC plot01

GVK Biosciences (Pvt.) Ltd.  
Analytical Research and Development

Data File: BG\_511803B3300 Sample ID: GVK-RAG-1-35  
Sample Type: Unknown Vial: BA4  
Instrument Name: N/A Injection Volume(μl): 2.00  
Operator: Thermo Scientific Acquisition Date: 03/14/18 09:40:46 PM  
Original Data Path: D:\GVKBIO\DATA\2018\DATA\MA R-2018\511803B3300 Run Time(min): 9.99

LC Method Details

Method : GVK\_10MIN  
Mobile Phase A: 0.1% FA in Water  
Mobile Phase B: 0.1% FA in ACN  
Gradient % of B: 0/2, 0.5/2, 9.5/98, 9.7/98, 10/2  
Flow : 0.6ml/min  
Column: BEH C18, 2.1\*50mm, 1.7um,

Detector Type: PDA  
Wavelength Range 1 (nm): 215.00000

UV Chromatogram

RT: 0.00 - 9.99 SM: 5G

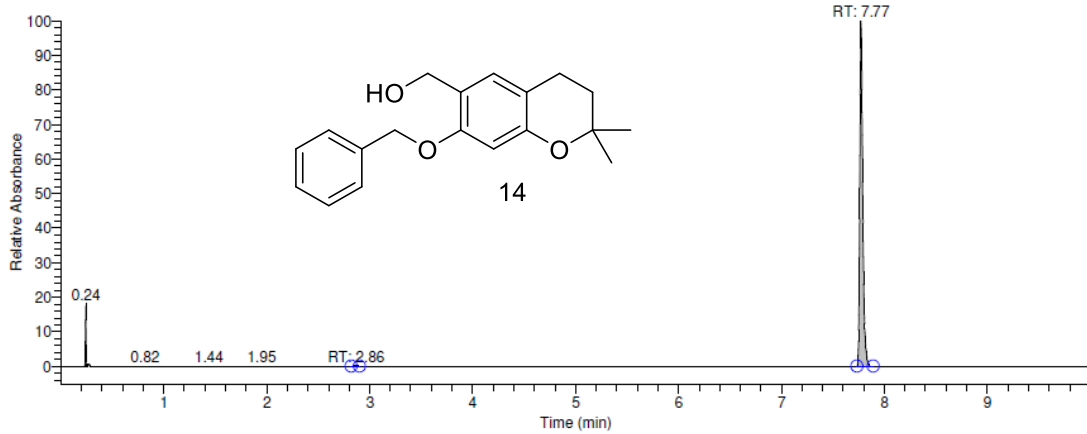

NL:  
1.81E6  
Spectrum  
Maximum  
nm=214.5  
215.5 PDA  
Avalon  
BG\_511803B:  
00

| RT   | Peak Area  | Area % |
|------|------------|--------|
| 2.86 | 9658.10    | 0.25   |
| 7.77 | 3786128.60 | 99.75  |

Operator: Thermo Scientific  
Instrument Name: N/A

Page 1 of 1  
Wednesday, March 14, 2018, 21:42:16

RT: 0.00 - 10.02

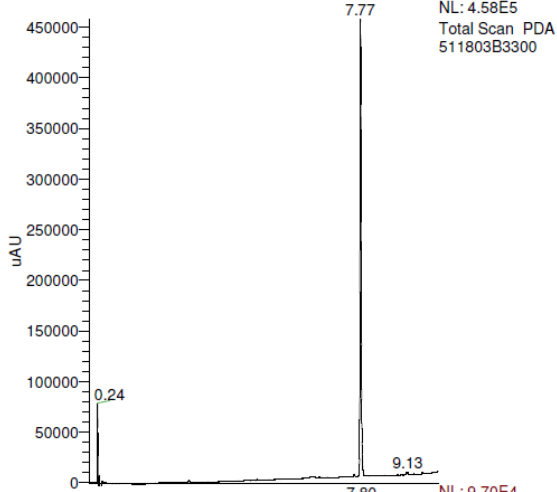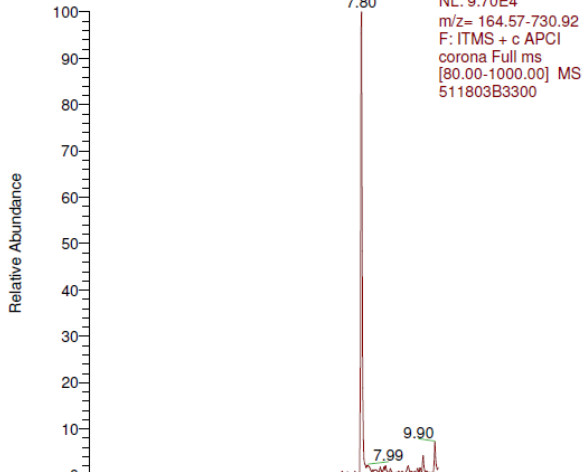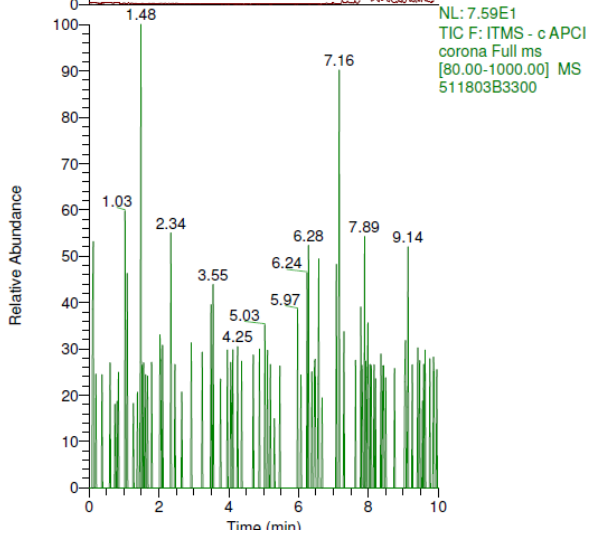

511803B3300 #801 RT: 7.80 AV: 1 NL: 8.31E4  
F: ITMS + c APCI corona Full ms [80.00-1000.00]

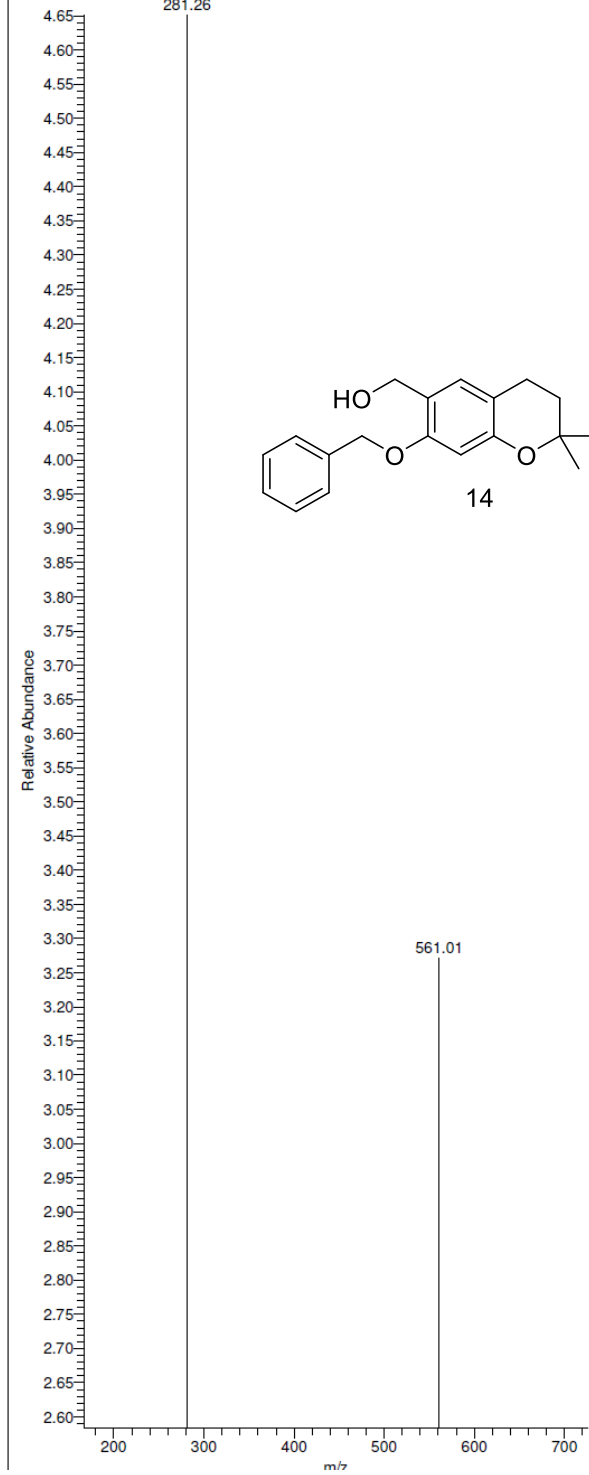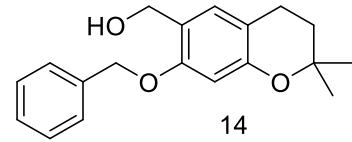

GVK-PRX-A139-45  
AR NO-/NMR/4/18/2311

Reference Code: 511804C0484-GVK-PRG-1-47P  
Solvent: cdcl3  
Archive directory:  
/home/gvkbio/data/2018/Apr  
Agilent 400-MRDD2  
Data collected on: Apr 23 2018  
Experiment: PROTON

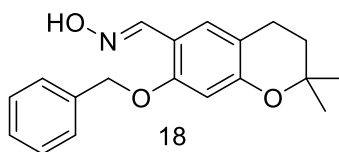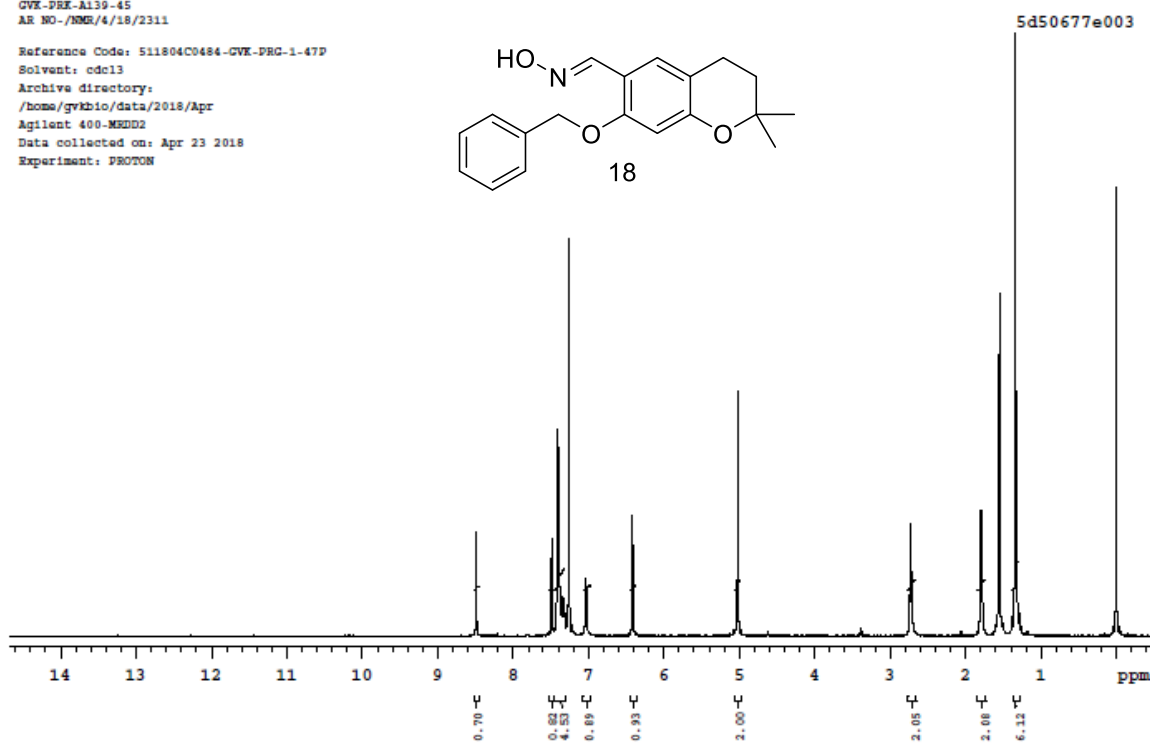

GVK-PRX-A139-45  
AR NO-/NMR/4/18/2311

Reference Code: 511804C0484-GVK-PRG-1-47P  
Solvent: cdcl3  
Archive directory:  
/home/gvkbio/data/2018/Apr  
Agilent 400-MRDD2  
Data collected on: Apr 23 2018  
Experiment: PROTON

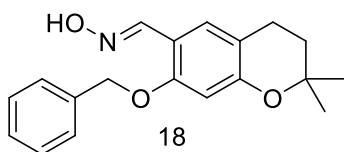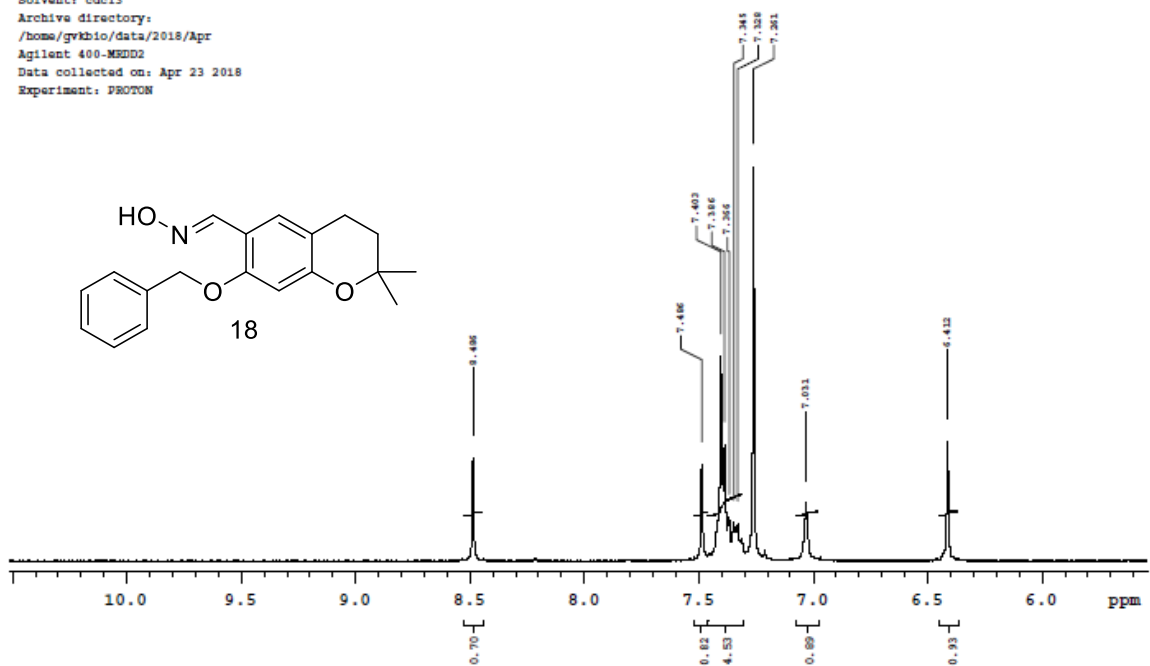

GVK-PRX-A139-45  
AR NO-/NMR/4/18/2311

5d50677e003

Reference Code: 511804C0484-GVK-PRG-1-47D  
Solvent: cdcl3  
Archive directory:  
/home/gvkbio/data/2018/Apr  
Agilent 400-ME802  
Data collected on: Apr 23 2018  
Experiment: PROTON

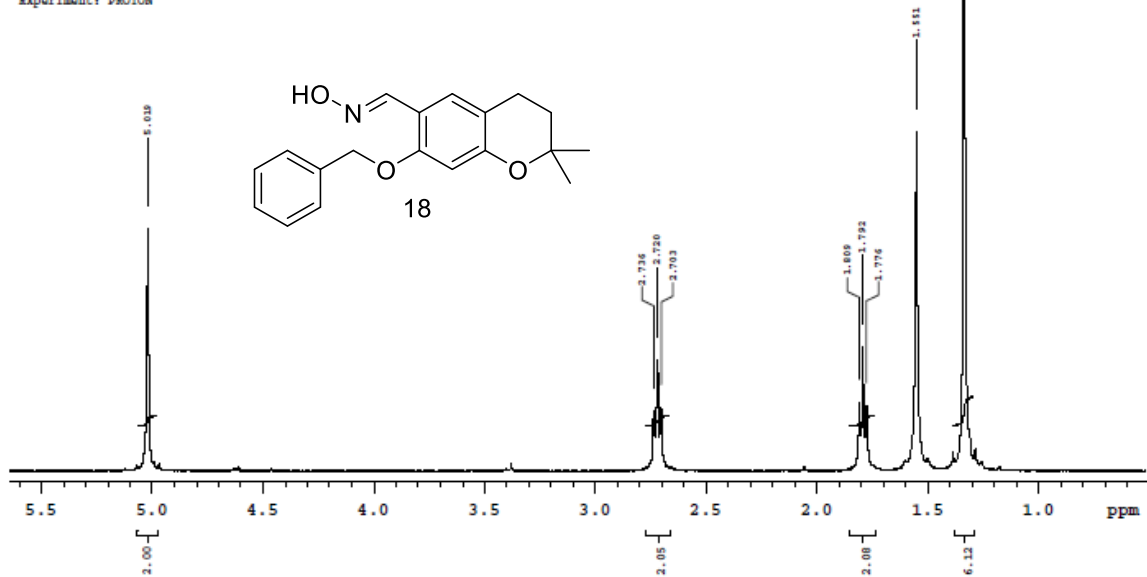

**GVK Biosciences (Pvt.) Ltd.**  
**Analytical Research and Development**

|                  |                   |                       |                      |
|------------------|-------------------|-----------------------|----------------------|
| Data File:       | BG_511804C0483-   | Sample ID:            | GVK-RAG-1-47p        |
| Sample Name:     |                   | Vial:                 | BC6                  |
| Instrument Name: | N/A               | Injection Volume(μl): | 1.00                 |
| Operator:        | Thermo Scientific | Run Time(min):        | 5.49                 |
| INSTRUMENT ID:   | ANL-MCL5-LCMS-005 | Acquisition Date:     | 04/23/18 09:19:06 AM |

**LC Method Details**

---

Method : GVK\_5.5MIN  
 Mobile Phase A : 0.1% FA in Water  
 Mobile Phase B : 0.1% FA in ACN  
 Gradient % of B : 0/3, 0.3/3, 1.8/98, 4.5/98,4.51/3,5.5/3  
 Flow Rate : 0.6ml/min  
 Column : BEH C18, (2.1\*50mm), 1.7um

---

Detector Type: PDA  
 Wavelength Range 1 (nm): 215.00000

**UV Chromatogram**

RT: 0.00 - 5.49 SM: 1G

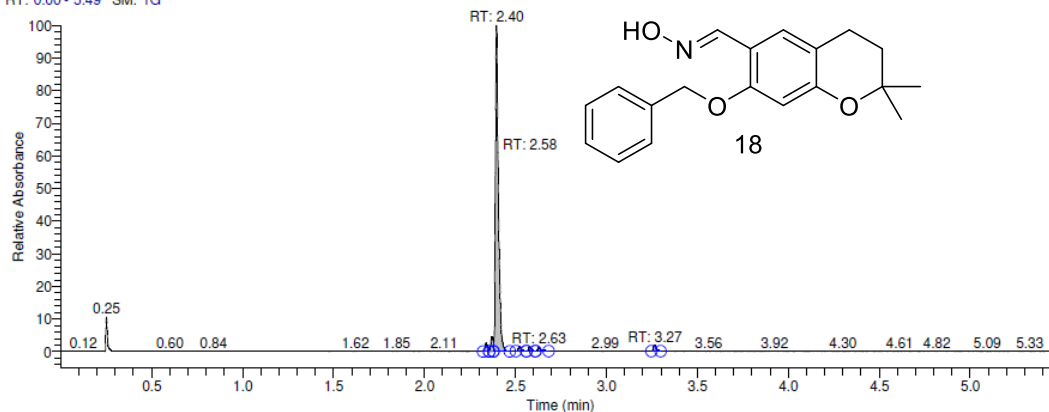

NL:  
 1.77E6  
 nm=214.5-  
 215.5 PDA  
 Avalon  
 BG\_511804  
 C0483-

| RT   | Peak Area  | Area % |
|------|------------|--------|
| 2.34 | 48482.70   | 2.19   |
| 2.37 | 70026.70   | 3.16   |
| 2.40 | 1963930.18 | 88.67  |
| 2.52 | 32040.58   | 1.45   |
| 2.58 | 27014.08   | 1.22   |
| 2.63 | 29576.42   | 1.34   |
| 3.27 | 43907.36   | 1.98   |

Operator: Thermo Scientific  
 Instrument Name: N/A

Page 1 of 1  
 Monday, April 23, 2018, 09:19:39

RT: 1.76 - 4.53

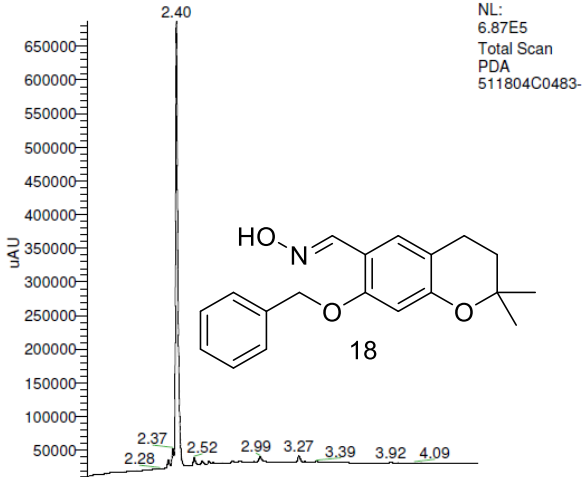

511804C0483- #167 RT: 2.43 AV: 1 NL: 1.66E5  
F: ITMS + c ESI Full ms [80.00-1000.00]

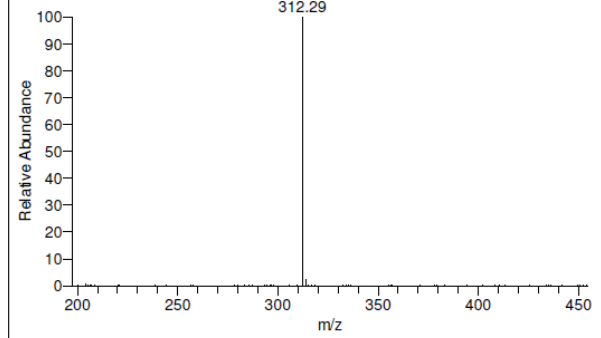

511804C0483- #163 RT: 2.38 AV: 1 NL: 1.33E4  
F: ITMS + c ESI Full ms [80.00-1000.00]

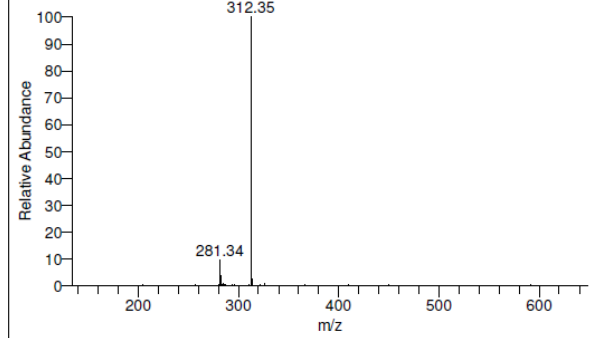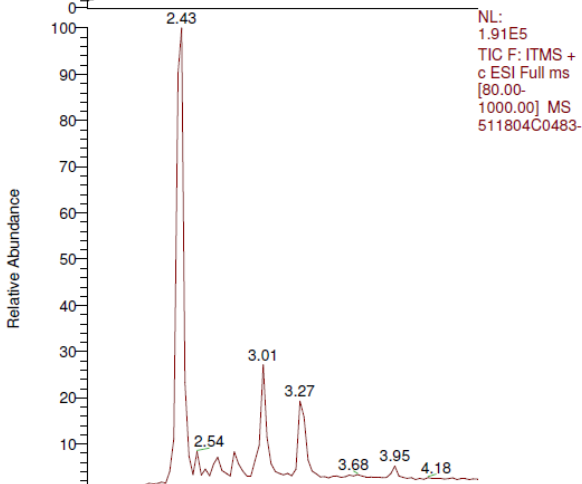

511804C0483- #161 RT: 2.35 AV: 1 NL: 2.56E3  
F: ITMS + c ESI Full ms [80.00-1000.00]

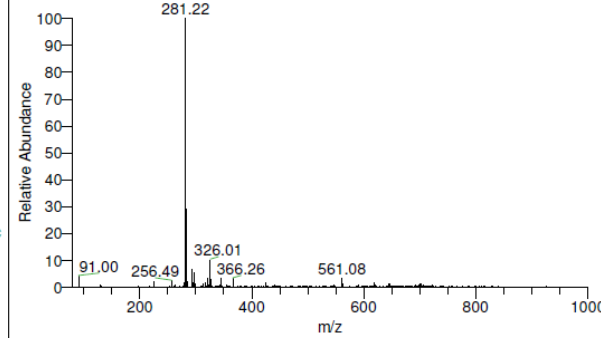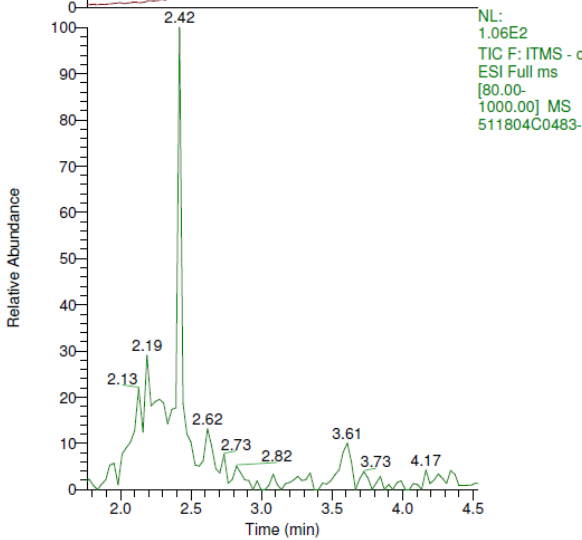

511804C0483- #175 RT: 2.54 AV: 1 NL: 4.45E3  
F: ITMS + c ESI Full ms [80.00-1000.00]

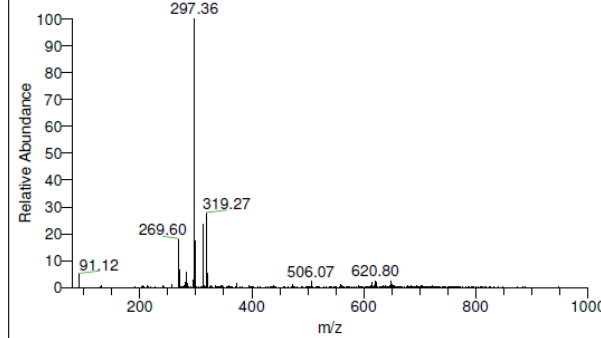



GVK-RAG-1-70  
AR NO-NMR/18/10/2064

Reference Code: 511581082064-GVK-RAG-1-70  
Solvent: cdcl3  
Archive directory:  
/home/gvkbio/data/2018/Oct  
Agilent 400-MRSD2  
Data collected on: Oct 12 2018  
Experiment: PROTON

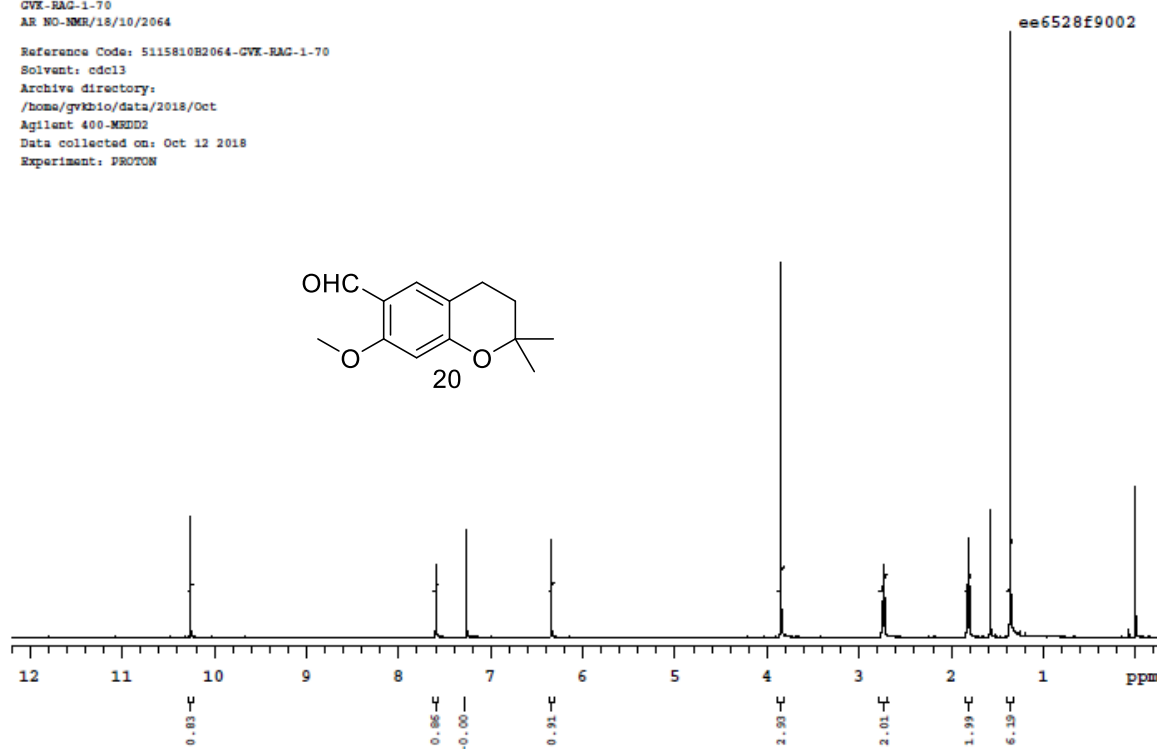

Plotname: 511581082064-GVK-RAG-1-70\_PROTON\_01.RRC\_plot01

GVK-RAG-1-70  
AR NO-NMR/18/10/2064

Reference Code: 511581082064-GVK-RAG-1-70  
Solvent: cdcl3  
Archive directory:  
/home/gvkbio/data/2018/Oct  
Agilent 400-MRSD2  
Data collected on: Oct 12 2018  
Experiment: PROTON

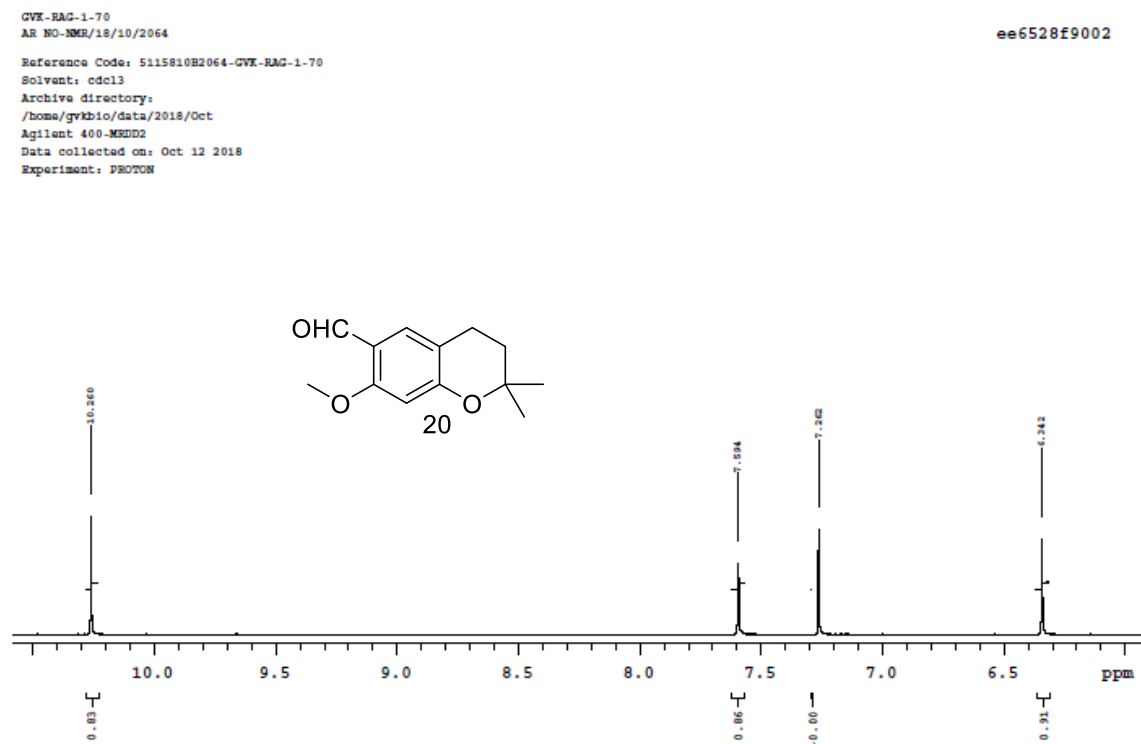

Plotname: 511581082064-GVK-RAG-1-70\_PROTON\_01.RRC\_plot02

GVK-RAG-1-70  
AR NO-NMR/18/10/2064

Reference Code: 5115810H2064-GVK-RAG-1-70

Solvent: cdcl3

Archive directory:

/home/gvkbio/data/2018/Oct

Agilent 400-MRSD2

Data collected on: Oct 12 2018

Experiment: PROTON

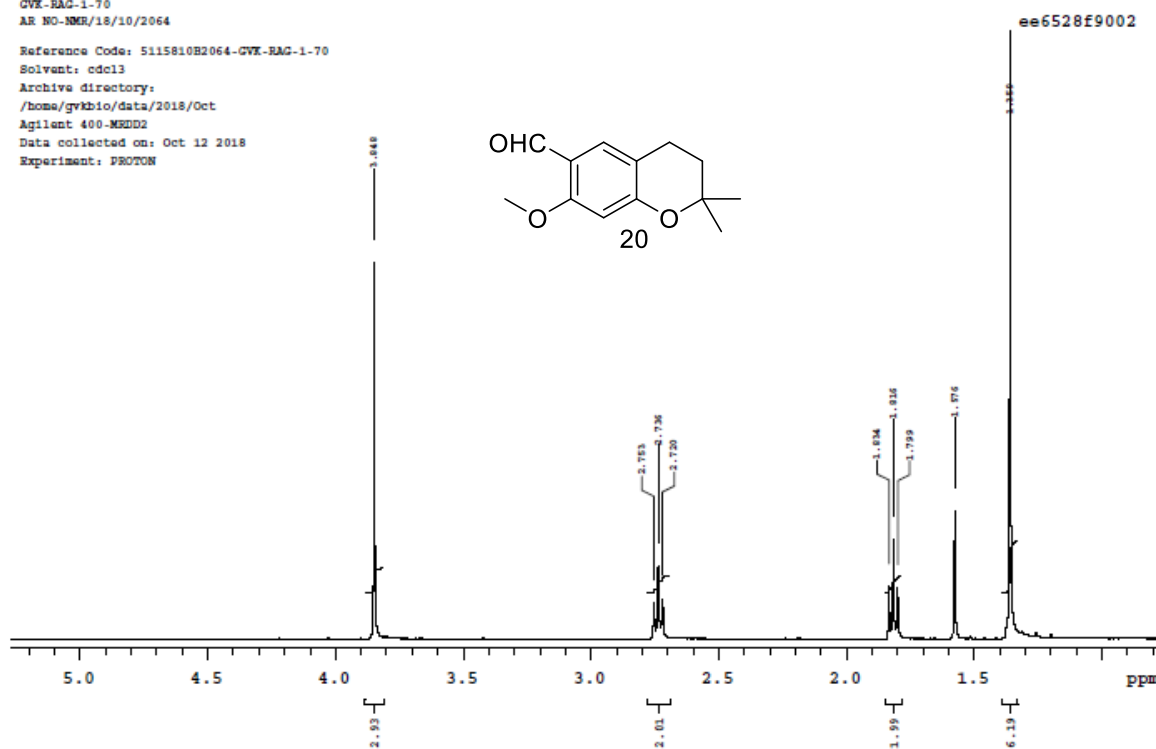

GVK BIOSCIENCES PVT. LTD.  
 MEDICINAL CHEMISTRY LABORATORY - ANALYTICAL RESEARCH  
 LCMS REPORT

Sample Name : GVK-RAG-1-70 Vial position : P1-C-01  
 Date of Analysis : 10/12/2018 12:20:50 PM Injection Vol : 0.300µl  
 Acq. Method : RND-FA-4.01 Instrument ID : ANL-MCL5-LCMS-001

RND-FA-4.01 MIN :-

Column : ACQUITY UPLC BEH C18 (50mmx2.1mm, 1.7µm)  
 Mobile Phase : A1 - 0.1 % FA IN WATER ; B1: 0.1%FA IN ACN  
 Gradient : Time (min) / %B1:0/3,0.3/3,2.3/98,3.5/98,4.0/3,4.01/3  
 Flow Rate : 0.6 ml/min  
 Column Temp : 50°C

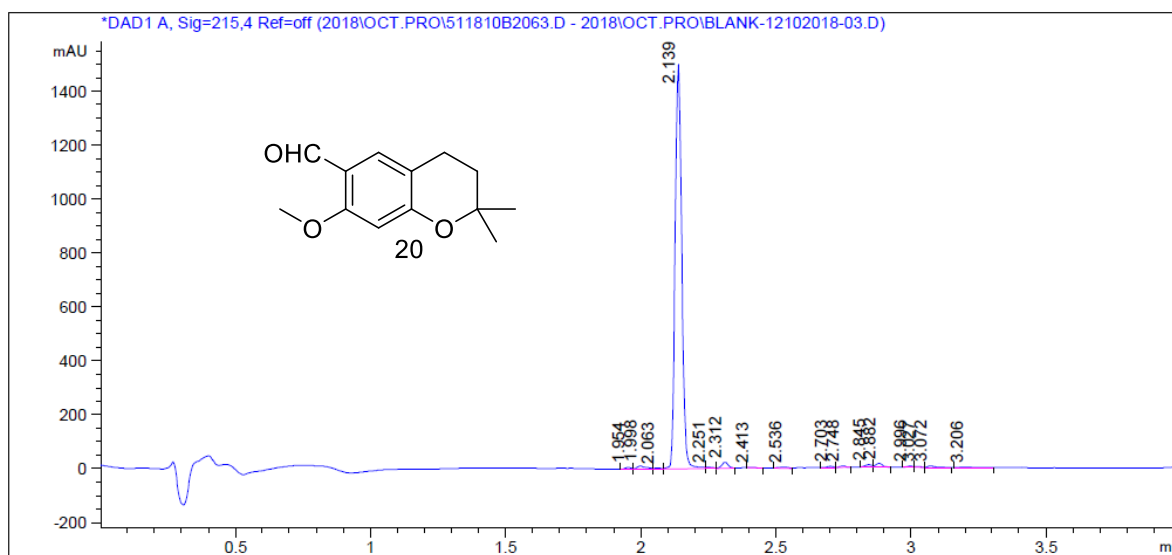

| Peak No | RT min | Area     | Area % |
|---------|--------|----------|--------|
| 1       | 1.95   | 10.942   | 0.401  |
| 2       | 2.00   | 27.523   | 1.008  |
| 3       | 2.06   | 6.110    | 0.224  |
| 4       | 2.14   | 2542.948 | 93.140 |
| 5       | 2.25   | 9.294    | 0.340  |
| 6       | 2.31   | 38.671   | 1.416  |
| 7       | 2.41   | 2.306    | 0.084  |
| 8       | 2.54   | 8.980    | 0.329  |
| 9       | 2.70   | 5.802    | 0.213  |
| 10      | 2.75   | 6.768    | 0.248  |
| 11      | 2.84   | 16.009   | 0.586  |
| 12      | 2.88   | 22.676   | 0.831  |
| 13      | 3.00   | 5.883    | 0.215  |
| 14      | 3.03   | 4.806    | 0.176  |
| 15      | 3.07   | 12.971   | 0.475  |
| 16      | 3.21   | 8.567    | 0.314  |

Analysed by :

Page 1 of 2

MS Spectrum

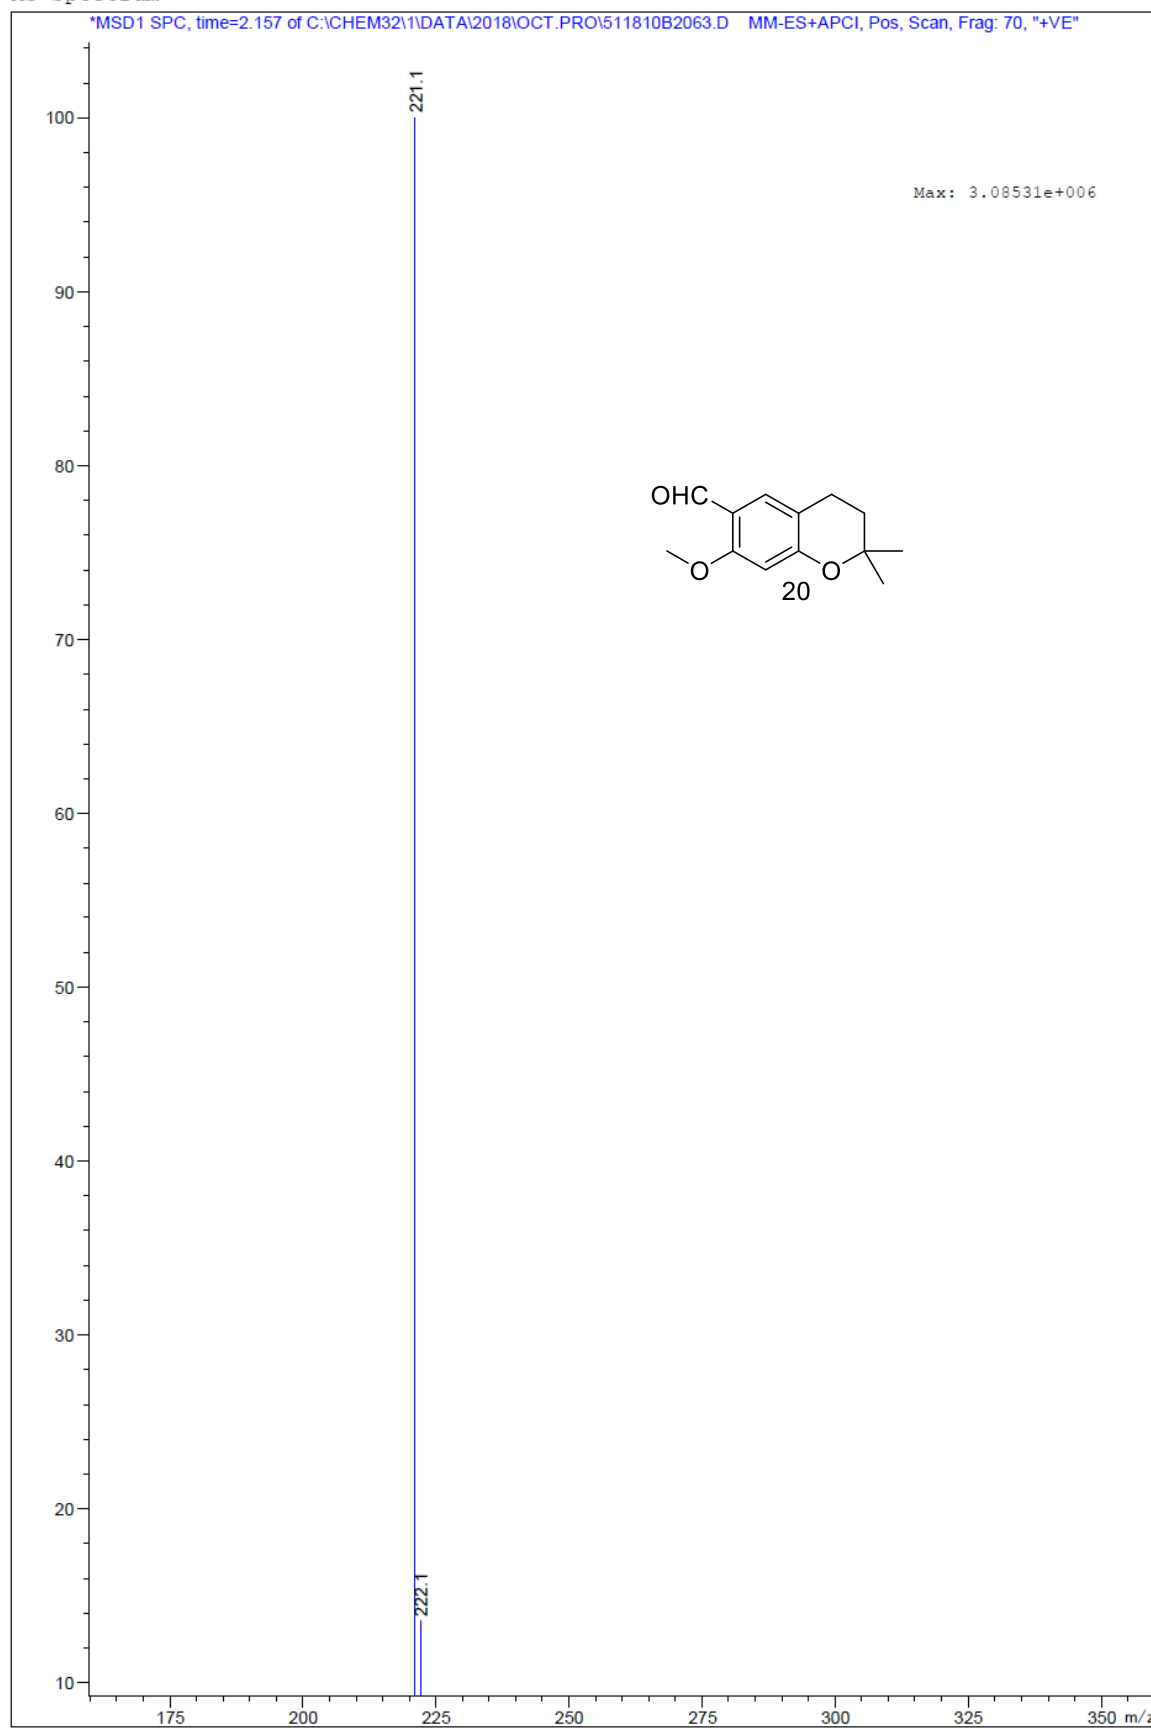

GVK-RAG-1-76

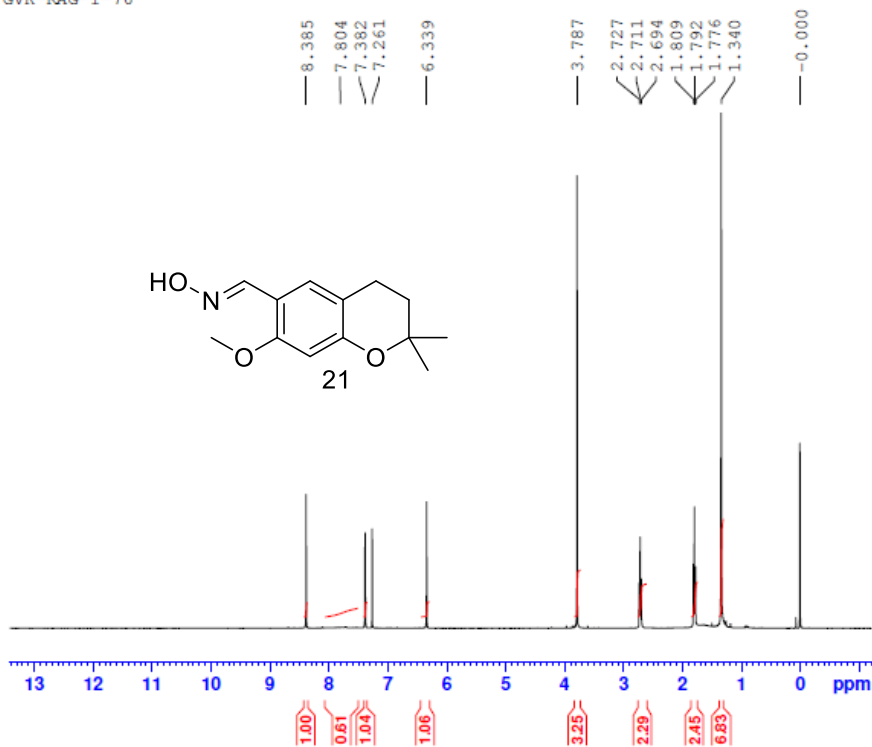

```

Current Data Parameters
NAME      5120100590-GVK-RAG-1-76
EXPNO    1
PROCNO   1

F2 - Acquisition Parameters
Date_    20201020
Time     20.51 h
INSTRUM  Avance Neo nanobay
PROBHD   Z163739_0247 (
PULPROG  zg30
TD        65536
SOLVENT  CDCl3
NS        8
DS        0
SWH       8196.722 Hz
FIDRES   0.250144 Hz
AQ        3.9976959 sec
RG        101
DW        61.000 usec
DE        13.89 usec
TE        298.0 K
D1        1.00000000 sec
TDO       1
SFO1     400.2024712 MHz
NUC1      1H
PQ        2.67 usec
PI        8.00 usec
PLW1     23.09399986 W

F2 - Processing parameters
SI        65536
SF        400.2000094 MHz
WDW       EM
SSB       0
LB        0.30 Hz
GB        0
PC        1.00
    
```

ANL-MCL5-NMR-004

GVK-RAG-1-76

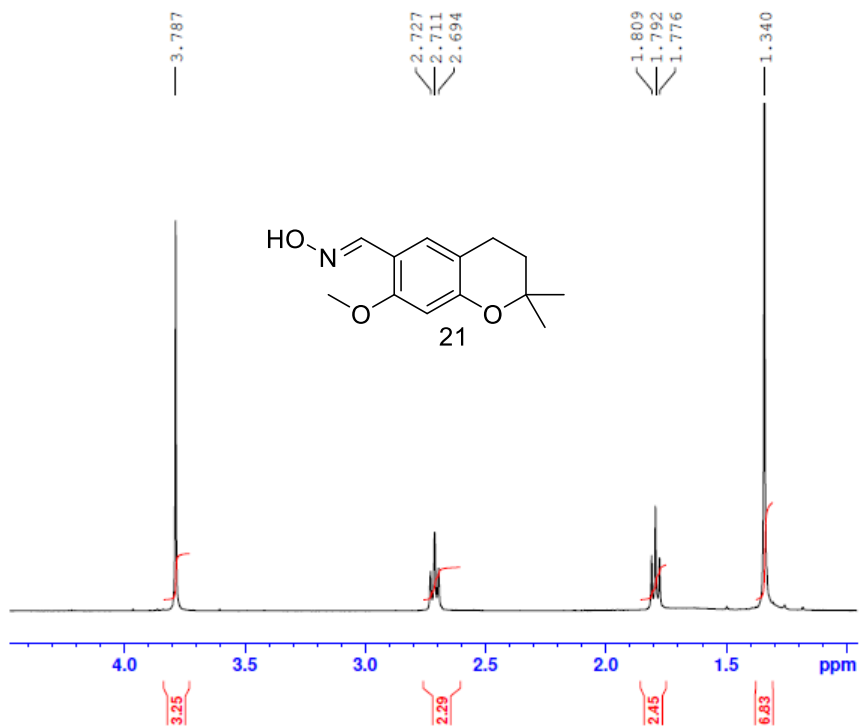

```

Current Data Parameters
NAME      5120100590-GVK-RAG-1-76
EXPNO    1
PROCNO   1

F2 - Acquisition Parameters
Date_    20201020
Time     20.51 h
INSTRUM  Avance Neo nanobay
PROBHD   Z163739_0247 (
PULPROG  zg30
TD        65536
SOLVENT  CDCl3
NS        8
DS        0
SWH       8196.722 Hz
FIDRES   0.250144 Hz
AQ        3.9976959 sec
RG        101
DW        61.000 usec
DE        13.89 usec
TE        298.0 K
D1        1.00000000 sec
TDO       1
SFO1     400.2024712 MHz
NUC1      1H
PQ        2.67 usec
PI        8.00 usec
PLW1     23.09399986 W

F2 - Processing parameters
SI        65536
SF        400.2000094 MHz
WDW       EM
SSB       0
LB        0.30 Hz
GB        0
PC        1.00
    
```

ANL-MCL5-NMR-004

GVK-RAG-1-76

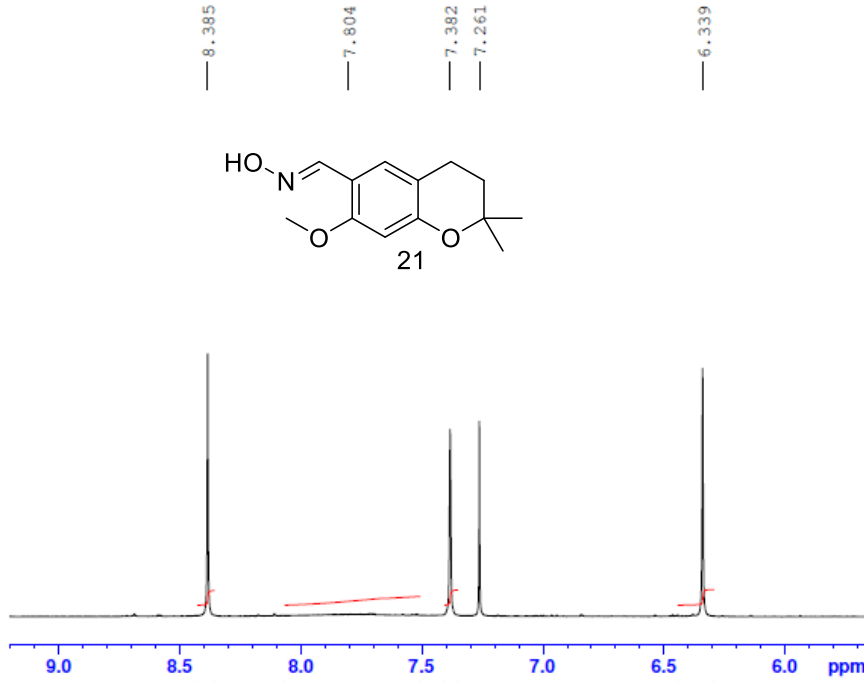

Current Data Parameters  
 Name 512010D0590-GVK-RAG-1-76  
 EXPNO 1  
 PROCNO 1

F2 - Acquisition Parameters  
 Date\_ 20201020  
 Time 20.51 h  
 INSTRUM Avance Neo nanobay  
 PROBRD z163739\_0247 f1  
 PULPROG zg30  
 TD 65536  
 SOLVENT CDCl3  
 NS 8  
 DS 0  
 SWH 8196.722 Hz  
 FIDRES 0.250144 Hz  
 AQ 3.9976959 sec  
 RG 101  
 DW 61.000 usec  
 DE 13.89 usec  
 TE 298.0 K  
 D1 1.00000000 sec  
 TDO 1  
 SFO1 400.2024712 MHz  
 NUC1 1H  
 PD 2.67 usec  
 P1 8.00 usec  
 P1M1 23.09399986 W

F2 - Processing parameters  
 SI 65536  
 SF 400.2000094 MHz  
 WDW EM  
 SSB 0  
 LB 0.30 Hz  
 GB 0  
 PC 1.00

ANL-MCL5-NMR-004

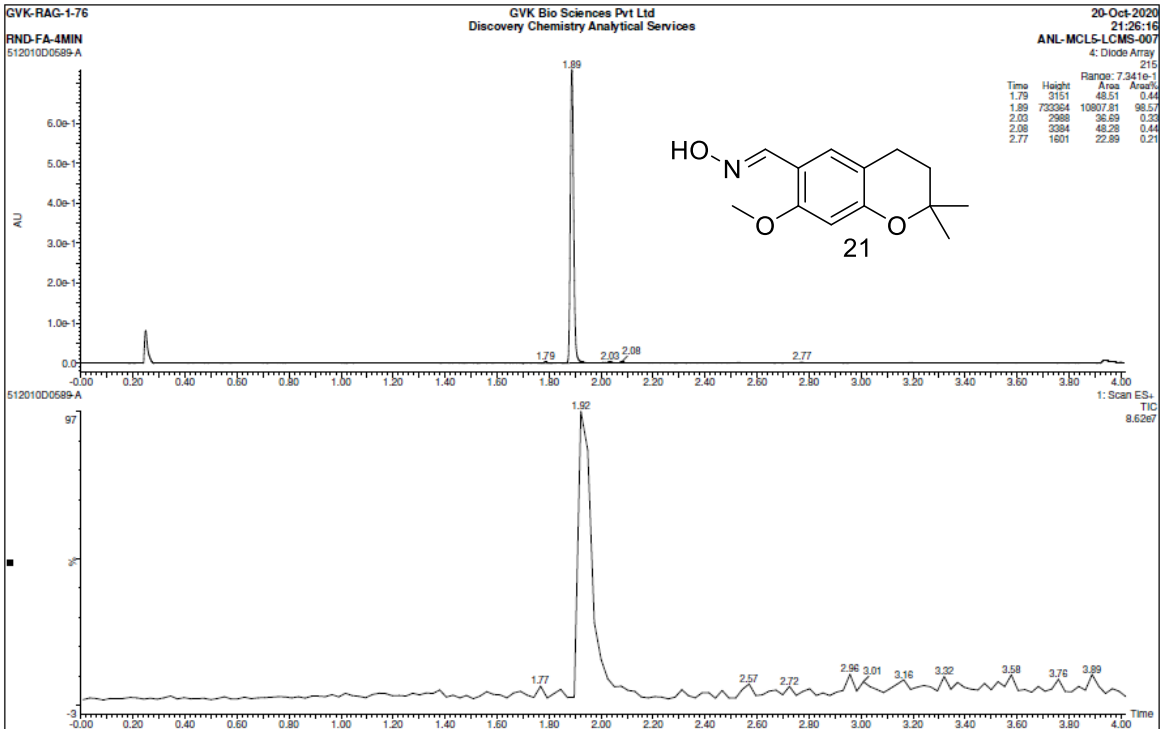

Acq Method Formic Acid\_4.0 Min

21:26:16

512010D0589-A 75 (1.522)

ANL-MCLS-LCMS-007

1: Scan ES+

6.72e7

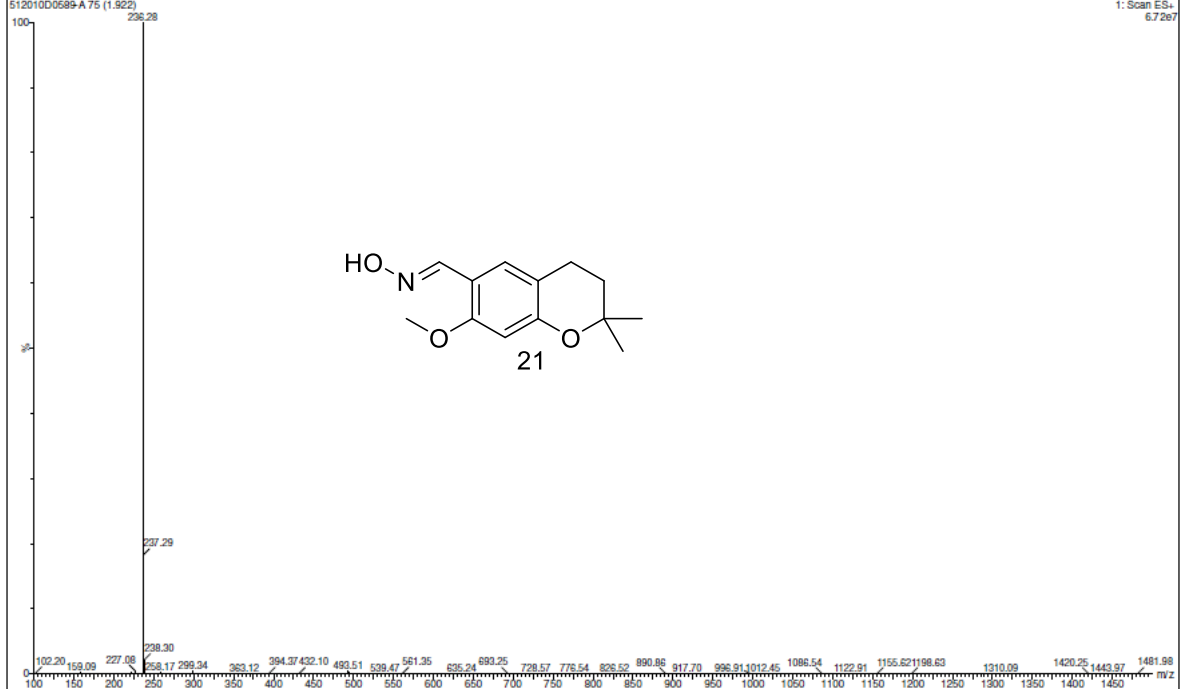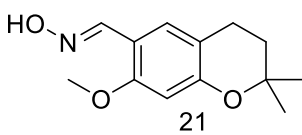

Supplement: d1nj01985f1.pdf [file d1nj01985f1.pdf]
